# Supplementary material for: How many measurements are needed to estimate accurate daily and annual soil respiration fluxes? Analysis using data from a temperate rainforest
Source: Copernicus journal article supplement (doi:10.5194/bg-13-6599-2016), 2016-12-15
Supplement: Supplementary file 1 [file bg-13-6599-2016-supplement.zip]

Archive with 3 entries (3 files):
- bg-13-6599-2016-supplement-title-page.pdf
- Supplement.pdf
- RS_Dataset.xlsx
