# Supplementary material for: How many measurements are needed to estimate accurate daily and annual soil respiration fluxes? Analysis using data from a temperate rainforest
Source: Copernicus journal article supplement (doi:10.5194/bg-13-6599-2016), 2016-12-15
Supplement: Supplementary file 1 [file bg-13-6599-2016-supplement.zip › bg-13-6599-2016-supplement-title-page.pdf]

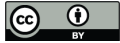

## *Supplement of*

# **How many measurements are needed to estimate accurate daily and annual soil respiration fluxes? Analysis using data from a temperate rainforest**

**Jorge F. Perez-Quezada et al.**

*Correspondence to:* Jorge F. Perez-Quezada ([jorgepq@uchile.cl](mailto:jorgepq@uchile.cl))

- [bg-13-6599-2016-supplement-title-page.pdf](#)
- [RS\\_Dataset.xlsx](#)
- [Supplement.pdf](#)

The copyright of individual parts of the supplement might differ from the CC-BY 3.0 licence.
