# Supplementary material for: How many measurements are needed to estimate accurate daily and annual soil respiration fluxes? Analysis using data from a temperate rainforest
Source: Copernicus journal article supplement (doi:10.5194/bg-13-6599-2016), 2016-12-15
Supplement: Supplementary file 1 [file RS_Dataset.xlsx]

## Sheet:  Data
Year	Date	DOY	Hour	RS_C1	RS_C2	RS_C3	SWC_1	SWC_2	SWC_3	Tsoil_1	Tsoil_2	Tsoil_3
2013	2013-08-08	220	0	1.4	1.91	0.99	0.681516	0.713607	0.733758	7.50547	7.70373	7.60925
2013	2013-08-08	220	1	1.55	2.02	0.9	0.681295	0.713592	0.733717	7.39736	7.62522	7.53129
2013	2013-08-08	220	2	1.41	1.9	0.87	0.681007	0.713573	0.733664	7.27395	7.5424	7.43467
2013	2013-08-08	220	3	1.37	1.83	0.95	0.680708	0.713547	0.733605	7.13566	7.44466	7.32085
2013	2013-08-08	220	4	1.32	1.88	0.83	0.680423	0.713521	0.733553	7.01428	7.35698	7.21289
2013	2013-08-08	220	5	1.37	1.82	0.78	0.68012	0.713502	0.733506	6.88818	7.25804	7.09973
2013	2013-08-08	220	6	1.36	2.06	1.02	0.679846	0.71349	0.733469	6.73104	7.16151	6.9547
2013	2013-08-08	220	7	1.34	1.51	0.89	0.67963	0.713477	0.733458	6.65245	7.0864	6.87263
2013	2013-08-08	220	8	1.44	1.99	1.04	0.679414	0.713468	0.733434	6.53199	6.99364	6.75486
2013	2013-08-08	220	9	1.36	1.65	0.92	0.679167	0.71346	0.733406	6.39166	6.898	6.62038
2013	2013-08-08	220	10	1.29	1.5	1	0.679073	0.713454	0.733401	6.25762	6.79596	6.49303
2013	2013-08-08	220	11	1.42	1.6	1.38	0.679289	0.713478	0.733449	6.1955	6.72885	6.40966
2013	2013-08-08	220	12	1.51	1.65	1.39	0.679476	0.713571	0.73348	6.19645	6.69371	6.35956
2013	2013-08-08	220	13	1.55	1.63	1.67	0.679513	0.713627	0.7335	6.30081	6.73885	6.38166
2013	2013-08-08	220	14	1.82	1.79	1.44	0.67939	0.713645	0.733519	6.38746	6.75652	6.38647
2013	2013-08-08	220	15	1.57	1.71	1.53	0.679153	0.713651	0.733539	6.51328	6.8136	6.42887
2013	2013-08-08	220	16	1.76	1.85	1.66	0.678912	0.713647	0.733547	6.61149	6.85173	6.46255
2013	2013-08-08	220	17	1.72	1.68	1.49	0.678637	0.713639	0.733555	6.74012	6.92672	6.53319
2013	2013-08-08	220	18	1.49	2.21	0.79	0.678293	0.713626	0.733553	6.84929	7.00303	6.60533
2013	2013-08-08	220	19	1.59	1.86	1.26	0.677947	0.713612	0.733544	6.90491	7.05369	6.66345
2013	2013-08-08	220	20	1.47	1.69	1.34	0.677655	0.713599	0.733535	6.89956	7.06238	6.68311
2013	2013-08-08	220	21	1.53	1.63	0.94	0.677388	0.713582	0.733519	6.86079	7.04162	6.68761
2013	2013-08-08	220	22	1.5	1.94	1.05	0.67712	0.713566	0.733501	6.77842	7.0095	6.6537
2013	2013-08-08	220	23	1.37	1.54	0.81	0.676844	0.713548	0.733481	6.67176	6.94286	6.59473
2013	2013-08-09	221	0	1.38	1.6	0.7	0.676636	0.713528	0.733455	6.54586	6.86681	6.51246
2013	2013-08-09	221	1	1.32	1.69	0.7	0.676463	0.713509	0.733422	6.3908	6.77331	6.39814
2013	2013-08-09	221	2	1.33	1.54	0.71	0.67629	0.713492	0.733389	6.25244	6.68069	6.28959
2013	2013-08-09	221	3	1.28	1.47	0.78	0.676133	0.713474	0.733358	6.10841	6.58325	6.16814
2013	2013-08-09	221	4	1.28	1.62	0.69	0.675954	0.713459	0.733328	5.95281	6.4713	6.03391
2013	2013-08-09	221	5	1.4	1.44	0.72	0.675823	0.71344	0.733304	5.84902	6.39265	5.93198
2013	2013-08-09	221	6	1.4	1.53	0.78	0.67567	0.713425	0.733268	5.71172	6.29892	5.7988
2013	2013-08-09	221	7	1.25	1.86	0.86	0.675484	0.713413	0.733247	5.61343	6.21783	5.69942
2013	2013-08-09	221	8	1.31	1.49	0.92	0.675368	0.713401	0.733217	5.55015	6.16051	5.62513
2013	2013-08-09	221	9	1.28	1.54	0.95	0.675253	0.71339	0.733183	5.47978	6.09681	5.54717
2013	2013-08-09	221	10	1.26	1.48	1.01	0.675154	0.713388	0.733155	5.36706	6.00228	5.44015
2013	2013-08-09	221	11	1.43	1.55	1.3	0.67511	0.713388	0.733151	5.33723	5.95068	5.38247
2013	2013-08-09	221	12	1.71	1.55	1.37	0.675104	0.713389	0.733146	5.4454	5.99573	5.40567
2013	2013-08-09	221	13	1.68	1.57	1.39	0.67509	0.713395	0.733143	5.57361	6.03631	5.42453
2013	2013-08-09	221	14	1.64	1.65	1.62	0.675063	0.713325	0.733142	5.74586	6.10036	5.47429
2013	2013-08-09	221	15	1.56	1.62	1.43	0.675	0.712955	0.733126	5.96524	6.19954	5.56226
2013	2013-08-09	221	16	1.61	1.63	1.47	0.674901	0.712955	0.733119	6.14314	6.28281	5.63757
2013	2013-08-09	221	17	1.54	1.59	1.45	0.674934	0.712964	0.733188	6.29348	6.36048	5.71661
2013	2013-08-09	221	18	1.3	1.67	1.44	0.675752	0.713314	0.733715	6.40971	6.42963	5.79337
2013	2013-08-09	221	19	0.87	1.44	1.56	0.68217	0.713954	0.735213	6.4833	6.48058	5.85781
2013	2013-08-09	221	20	0.83	1.49	1.2	0.69485	0.714407	0.736007	6.53647	6.52255	5.91228
2013	2013-08-09	221	21	1.01	1.94	1.36	0.69384	0.714163	0.735819	6.58328	6.56571	5.97276
2013	2013-08-09	221	22	0.98	1.56	1.36	0.693054	0.714132	0.735766	6.63	6.61132	6.038
2013	2013-08-09	221	23	1.16	1.64	1.21	0.692562	0.714079	0.735753	6.68608	6.6643	6.1111
2013	2013-08-10	222	0	1.16	1.98	1.24	0.691019	0.713978	0.735575	6.74612	6.72018	6.18907
2013	2013-08-10	222	1	1.07	1.56	1.43	0.690469	0.713991	0.735581	6.80978	6.77424	6.27089
2013	2013-08-10	222	2	1.01	1.71	1.51	0.692599	0.714151	0.735855	6.87906	6.82961	6.35233
2013	2013-08-10	222	3	0.53	1.65	1.31	0.704895	0.714662	0.73688	6.96684	6.89848	6.44984
2013	2013-08-10	222	4	0.49	1.7	1.35	0.710976	0.714861	0.737097	7.09282	6.9955	6.57754
2013	2013-08-10	222	5	0.68	1.65	1.64	0.713311	0.715084	0.737035	7.23938	7.11516	6.72176
2013	2013-08-10	222	6	0.73	1.73	1.48	0.715966	0.715907	0.736952	7.3903	7.27924	6.87615
2013	2013-08-10	222	7	0.67	1.72	1.5	0.718433	0.716174	0.736937	7.53809	7.44478	7.0259
2013	2013-08-10	222	8	0.91	1.66	1.59	0.719354	0.716275	0.736828	7.67413	7.59387	7.17293
2013	2013-08-10	222	9	0.96	1.91	1.54	0.719617	0.716336	0.736789	7.7941	7.71513	7.30307
2013	2013-08-10	222	10	1.2	1.68	1.62	0.717136	0.716267	0.736533	7.90456	7.81687	7.42328
2013	2013-08-10	222	11	1.29	1.85	1.69	0.715771	0.71618	0.736408	8.01645	7.90868	7.5345
2013	2013-08-10	222	12	1.32	1.8	1.49	0.712652	0.716056	0.736226	8.13729	7.99551	7.64625
2013	2013-08-10	222	13	1.52	2.06	2.02	0.709992	0.715938	0.736009	8.25778	8.07389	7.749
2013	2013-08-10	222	14	1.69	2.11	1.94	0.707172	0.715826	0.735807	8.41147	8.17074	7.86542
2013	2013-08-10	222	15	1.73	1.98	1.81	0.70368	0.715671	0.735615	8.57447	8.2683	7.98185
2013	2013-08-10	222	16	1.74	2	1.73	0.701861	0.715266	0.735403	8.68697	8.33657	8.06965
2013	2013-08-10	222	17	1.66	2.23	1.91	0.700616	0.714784	0.735214	8.76839	8.39805	8.14679
2013	2013-08-10	222	18	1.76	2.11	2.05	0.699383	0.714607	0.735029	8.83469	8.46024	8.22016
2013	2013-08-10	222	19	1.61	2.21	1.77	0.698258	0.714451	0.734861	8.87202	8.50261	8.27758
2013	2013-08-10	222	20	1.69	1.89	2.03	0.697091	0.714329	0.73473	8.82086	8.48381	8.27431
2013	2013-08-10	222	21	1.58	1.99	1.84	0.695475	0.714232	0.734637	8.80772	8.5025	8.3004
2013	2013-08-10	222	22	1.66	2.18	1.92	0.694159	0.714153	0.734543	8.76239	8.48845	8.30083
2013	2013-08-10	222	23	1.74	2.58	1.96	0.693094	0.714077	0.734456	8.70545	8.47025	8.29414
2013	2013-08-11	223	0	1.8	1.87	1.92	0.692115	0.714004	0.734375	8.64689	8.44433	8.28077
2013	2013-08-11	223	1	1.71	2.51	2.02	0.691156	0.713919	0.734306	8.5815	8.40827	8.25753
2013	2013-08-11	223	2	1.89	1.98	2.03	0.690348	0.713869	0.734261	8.54421	8.39197	8.25058
2013	2013-08-11	223	3	1.75	1.61	1.81	0.689596	0.713827	0.734265	8.51464	8.37658	8.24362
2013	2013-08-11	223	4	1.83	1.65	1.95	0.689169	0.713805	0.734316	8.49401	8.36579	8.23985
2013	2013-08-11	223	5	1.8	1.97	1.89	0.68863	0.713798	0.734348	8.47096	8.35332	8.23429
2013	2013-08-11	223	6	1.74	2.19	2.03	0.688135	0.713805	0.734418	8.475	8.36316	8.24888
2013	2013-08-11	223	7	1.66	1.93	2.22	0.687747	0.713808	0.734486	8.43989	8.34253	8.23669
2013	2013-08-11	223	8	1.78	2.51	1.91	0.686678	0.713792	0.734519	8.43035	8.34709	8.24641
2013	2013-08-11	223	9	1.91	2.05	2.12	0.685819	0.71377	0.734522	8.3964	8.32449	8.23269
2013	2013-08-11	223	10	1.87	1.87	2.06	0.685303	0.713774	0.734566	8.36837	8.305	8.21753
2013	2013-08-11	223	11	1.92	2.43	2.01	0.684974	0.71381	0.734612	8.40735	8.32535	8.23742
2013	2013-08-11	223	12	1.9	1.89	2.11	0.684844	0.713808	0.734663	8.47661	8.35684	8.26711
2013	2013-08-11	223	13	1.74	1.84	2.01	0.684752	0.713818	0.734701	8.52217	8.37343	8.28419
2013	2013-08-11	223	14	1.82	1.76	1.99	0.684448	0.7138	0.734686	8.60463	8.41218	8.3204
2013	2013-08-11	223	15	1.74	1.79	1.75	0.683927	0.713771	0.734658	8.71389	8.47488	8.37838
2013	2013-08-11	223	16	1.78	1.89	1.5	0.683272	0.713733	0.734604	8.79822	8.51566	8.42628
2013	2013-08-11	223	17	1.82	1.86	1.66	0.682824	0.713688	0.734541	8.82332	8.53599	8.44651
2013	2013-08-11	223	18	1.73	2.16	1.32	0.682296	0.713644	0.734458	8.80702	8.53364	8.44562
2013	2013-08-11	223	19	1.64	1.76	1.16	0.681767	0.713615	0.73437	8.77024	8.52709	8.43806
2013	2013-08-11	223	20	1.7	1.69	1.18	0.681345	0.713585	0.734272	8.66759	8.46205	8.38771
2013	2013-08-11	223	21	1.61	1.68	1.02	0.680946	0.713554	0.734196	8.51402	8.3661	8.29475
2013	2013-08-11	223	22	1.63	1.74	0.91	0.68054	0.71352	0.734121	8.33564	8.26324	8.18145
2013	2013-08-11	223	23	1.56	1.63	0.78	0.6802	0.713492	0.734042	8.14531	8.13016	8.04268
2013	2013-08-12	224	0	1.39	1.93	0.77	0.679884	0.713469	0.733964	7.92688	7.99754	7.87254
2013	2013-08-12	224	1	1.36	1.55	0.88	0.679572	0.713445	0.733889	7.70329	7.87087	7.68941
2013	2013-08-12	224	2	1.46	1.56	0.9	0.679302	0.713421	0.733823	7.49749	7.71898	7.51497
2013	2013-08-12	224	3	1.39	1.55	0.85	0.679019	0.713398	0.73376	7.29273	7.56444	7.34413
2013	2013-08-12	224	4	1.31	1.59	0.77	0.678726	0.713376	0.733704	7.08254	7.39884	7.16358
2013	2013-08-12	224	5	1.29	1.49	0.81	0.678499	0.713354	0.733653	6.8898	7.25806	6.99256
2013	2013-08-12	224	6	1.27	1.75	0.91	0.678293	0.713335	0.733629	6.70235	7.12842	6.81977
2013	2013-08-12	224	7	1.23	1.44	0.87	0.678069	0.713321	0.733632	6.52632	6.99402	6.65141
2013	2013-08-12	224	8	1.24	1.92	0.84	0.677838	0.713313	0.733619	6.3507	6.85417	6.48728
2013	2013-08-12	224	9	1.25	1.42	0.78	0.677632	0.713301	0.733581	6.16647	6.71101	6.31014
2013	2013-08-12	224	10	1.34	1.83	0.87	0.677475	0.71328	0.733507	5.98792	6.5846	6.13708
2013	2013-08-12	224	11	1.42	1.31	0.89	0.677324	0.713262	0.733438	5.80501	6.41931	5.95522
2013	2013-08-12	224	12	1.35	2.13	1.11	0.677136	0.713253	0.733393	5.73823	6.34492	5.85386
2013	2013-08-12	224	13	1.38	1.86	1.25	0.676948	0.713246	0.733345	5.67664	6.2767	5.76657
2013	2013-08-12	224	14	1.58	1.87	1.43	0.676756	0.713058	0.733308	5.73469	6.28311	5.75522
2013	2013-08-12	224	15	1.49	2.55	1.39	0.676545	0.713018	0.733276	5.83057	6.3102	5.76493
2013	2013-08-12	224	16	1.46	2.13	1.33	0.676325	0.713001	0.73325	5.93006	6.33902	5.77952
2013	2013-08-12	224	17	1.61	1.68	1.65	0.676104	0.712986	0.733228	6.07233	6.3998	5.82441
2013	2013-08-12	224	18	1.54	1.82	1.42	0.675896	0.712973	0.733203	6.17843	6.44598	5.85411
2013	2013-08-12	224	19	1.52	1.61	1.65	0.675747	0.71296	0.733182	6.26742	6.49425	5.89398
2013	2013-08-12	224	20	1.44	1.64	1.63	0.675599	0.712953	0.733157	6.30031	6.51989	5.91158
2013	2013-08-12	224	21	1.5	1.64	1.37	0.675444	0.712944	0.733144	6.34621	6.56279	5.9489
2013	2013-08-12	224	22	1.37	1.59	1.14	0.675313	0.712935	0.733127	6.31516	6.54582	5.94152
2013	2013-08-12	224	23	1.25	1.51	0.87	0.675187	0.712925	0.733109	6.23772	6.50253	5.90959
2013	2013-08-13	225	0	1.25	1.46	0.91	0.675064	0.712911	0.73309	6.13239	6.44008	5.84598
2013	2013-08-13	225	1	1.25	1.44	0.84	0.674961	0.712892	0.733071	6.00007	6.36781	5.75955
2013	2013-08-13	225	2	1.42	1.44	0.85	0.674867	0.712882	0.733048	5.84926	6.26845	5.64626
2013	2013-08-13	225	3	1.23	1.47	0.83	0.674778	0.712871	0.733043	5.75345	6.20017	5.57581
2013	2013-08-13	225	4	1.28	1.43	0.76	0.674694	0.71286	0.73303	5.66483	6.12523	5.49906
2013	2013-08-13	225	5	1.18	1.61	0.79	0.674604	0.712847	0.733024	5.53986	6.03035	5.40077
2013	2013-08-13	225	6	1.18	1.43	0.78	0.674521	0.71284	0.733011	5.41276	5.94261	5.29502
2013	2013-08-13	225	7	1.16	1.4	0.99	0.674452	0.712836	0.732993	5.28283	5.84459	5.18702
2013	2013-08-13	225	8	1.13	1.56	0.75	0.674381	0.712826	0.732973	5.19345	5.77438	5.103
2013	2013-08-13	225	9	1.13	1.81	0.95	0.674305	0.712814	0.732954	5.07586	5.69305	4.9975
2013	2013-08-13	225	10	1.27	1.64	1.07	0.674224	0.712797	0.732919	4.94879	5.60134	4.88421
2013	2013-08-13	225	11	1.22	1.28	0.91	0.674159	0.712782	0.732886	4.80855	5.47769	4.75569
2013	2013-08-13	225	12	1.22	1.44	1.25	0.674122	0.712774	0.732867	4.7858	5.43636	4.70714
2013	2013-08-13	225	13	1.34	1.54	1.17	0.674115	0.712769	0.732845	4.73672	5.36589	4.63541
2013	2013-08-13	225	14	1.62	2.18	1.66	0.674061	0.712767	0.732832	4.87332	5.42017	4.66252
2013	2013-08-13	225	15	1.65	1.75	1.61	0.674017	0.712761	0.73282	5.13832	5.54124	4.75597
2013	2013-08-13	225	16	1.49	1.49	1.67	0.673849	0.712757	0.73281	5.37977	5.63974	4.84149
2013	2013-08-13	225	17	1.39	1.95	1.72	0.67368	0.712746	0.732782	5.56546	5.73225	4.92056
2013	2013-08-13	225	18	1.75	1.87	1.78	0.673498	0.712758	0.73275	5.7133	5.83	5.00793
2013	2013-08-13	225	19	1.56	1.5	1.63	0.673337	0.712747	0.732732	5.79878	5.89966	5.08097
2013	2013-08-13	225	20	1.26	1.43	1.26	0.673208	0.712742	0.732715	5.81315	5.92026	5.11223
2013	2013-08-13	225	21	1.22	1.4	1.02	0.673071	0.71273	0.7327	5.77772	5.91839	5.12346
2013	2013-08-13	225	22	1.21	1.61	0.94	0.672972	0.712746	0.732684	5.70083	5.88198	5.10522
2013	2013-08-13	225	23	1.21	1.41	0.79	0.672885	0.712739	0.732668	5.61091	5.83722	5.07348
2013	2013-08-14	226	0	1.16	1.65	0.81	0.672809	0.712712	0.732655	5.4898	5.78624	5.00783
2013	2013-08-14	226	1	1.26	1.39	0.77	0.672735	0.712691	0.73264	5.36352	5.71966	4.93307
2013	2013-08-14	226	2	1.27	1.35	0.76	0.67267	0.71268	0.732626	5.24071	5.64603	4.85583
2013	2013-08-14	226	3	1.15	1.34	0.94	0.672614	0.712669	0.73261	5.13083	5.57053	4.78108
2013	2013-08-14	226	4	1.27	1.31	0.72	0.672518	0.712661	0.732594	5.02167	5.49671	4.70755
2013	2013-08-14	226	5	1.22	1.75	0.92	0.672446	0.712651	0.732575	4.91479	5.41902	4.62745
2013	2013-08-14	226	6	1.23	1.34	1	0.672378	0.712643	0.73256	4.8239	5.34778	4.55349
2013	2013-08-14	226	7	1.22	1.68	0.9	0.6723	0.712638	0.732546	4.76774	5.29691	4.49982
2013	2013-08-14	226	8	1.2	1.66	0.97	0.672246	0.712635	0.732533	4.75651	5.27448	4.47471
2013	2013-08-14	226	9	1.29	1.76	1.06	0.672189	0.712644	0.732522	4.75235	5.25593	4.45275
2013	2013-08-14	226	10	1.29	1.55	1.08	0.672117	0.712648	0.732507	4.76514	5.24823	4.44895
2013	2013-08-14	226	11	1.35	1.56	1.14	0.672071	0.712652	0.732468	4.78892	5.2397	4.43941
2013	2013-08-14	226	12	1.35	1.43	1.14	0.672011	0.712636	0.732436	4.86714	5.28006	4.46851
2013	2013-08-14	226	13	1.09	1.66	1.17	0.67212	0.712689	0.732542	4.99911	5.34578	4.53475
2013	2013-08-14	226	14	0.65	1.48	1.06	0.674512	0.713357	0.733877	5.12518	5.40604	4.60582
2013	2013-08-14	226	15	0.96	1.47	1.08	0.681283	0.713902	0.734782	5.25984	5.47625	4.69827
2013	2013-08-14	226	16	0.89	1.5	1.25	0.686659	0.714147	0.735289	5.40951	5.56141	4.80212
2013	2013-08-14	226	17	0.96	1.53	1.24	0.688482	0.714076	0.735472	5.5573	5.65045	4.91396
2013	2013-08-14	226	18	1	1.51	1.22	0.68792	0.713985	0.735415	5.69767	5.74214	5.03162
2013	2013-08-14	226	19	0.63	1.42	1.34	0.691538	0.714303	0.735798	5.82424	5.81882	5.15019
2013	2013-08-14	226	20	0.65	1.31	1.35	0.709048	0.714888	0.736641	5.95539	5.92362	5.28236
2013	2013-08-14	226	21	1.05	1.34	1.89	0.70587	0.714675	0.736433	6.09314	6.04115	5.42698
2013	2013-08-14	226	22	0.89	1.7	1.63	0.703311	0.714693	0.73637	6.20992	6.14263	5.55591
2013	2013-08-14	226	23	0.87	1.49	2.28	0.701352	0.714719	0.736362	6.29573	6.22091	5.65603
2013	2013-08-15	227	0	0.99	1.52	1.5	0.700989	0.714697	0.736286	6.36539	6.29668	5.74224
2013	2013-08-15	227	1	0.88	1.68	2.11	0.700406	0.714636	0.736149	6.42829	6.38206	5.81822
2013	2013-08-15	227	2	0.98	1.84	1.98	0.699205	0.714536	0.735912	6.48101	6.46385	5.88033
2013	2013-08-15	227	3	1.25	1.63	1.83	0.698155	0.714445	0.735686	6.53332	6.54915	5.93944
2013	2013-08-15	227	4	1.18	1.98	1.55	0.697075	0.714355	0.735486	6.5553	6.60911	5.97976
2013	2013-08-15	227	5	1.24	1.65	1.63	0.695982	0.714241	0.735321	6.58852	6.68174	6.03122
2013	2013-08-15	227	6	1.13	1.71	1.53	0.695159	0.714159	0.735192	6.6154	6.74137	6.08118
2013	2013-08-15	227	7	1.2	1.49	1.36	0.694245	0.71409	0.735052	6.58145	6.7604	6.0951
2013	2013-08-15	227	8	1.18	1.73	1.58	0.693303	0.714041	0.734995	6.59817	6.81346	6.14407
2013	2013-08-15	227	9	1.12	1.55	1.6	0.692863	0.714057	0.735032	6.59305	6.84501	6.17389
2013	2013-08-15	227	10	1.2	1.36	1.4	0.692448	0.714062	0.735051	6.54658	6.83798	6.17052
2013	2013-08-15	227	11	1.27	1.52	1.4	0.691925	0.71403	0.735002	6.55689	6.86559	6.19996
2013	2013-08-15	227	12	1.37	1.43	1.44	0.691078	0.713986	0.734947	6.56467	6.87703	6.21857
2013	2013-08-15	227	13	1.42	1.51	1.46	0.690301	0.713935	0.734879	6.61886	6.91298	6.25606
2013	2013-08-15	227	14	1.33	1.49	1.36	0.689446	0.71389	0.734836	6.82563	7.03016	6.37638
2013	2013-08-15	227	15	1.5	1.52	1.38	0.688751	0.713821	0.734789	6.92393	7.07234	6.42042
2013	2013-08-15	227	16	1.48	1.67	1.22	0.687941	0.71378	0.734746	7.03103	7.13122	6.48718
2013	2013-08-15	227	17	1.35	2.23	1.29	0.687225	0.713756	0.73469	7.15531	7.21418	6.57559
2013	2013-08-15	227	18	1.88	1.82	1.38	0.686653	0.713687	0.734621	7.23611	7.27199	6.63902
2013	2013-08-15	227	19	1.29	1.75	1.35	0.68515	0.713654	0.734561	7.25049	7.29382	6.67487
2013	2013-08-15	227	20	1.7	1.67	1.39	0.684484	0.713624	0.734486	7.20721	7.28452	6.68073
2013	2013-08-15	227	21	1.47	1.62	1.44	0.683945	0.713591	0.734405	7.20346	7.308	6.71343
2013	2013-08-15	227	22	1.39	1.82	1.43	0.683139	0.713563	0.734357	7.20001	7.32654	6.74089
2013	2013-08-15	227	23	1.4	1.93	1.59	0.682905	0.713551	0.73439	7.22286	7.36509	6.79232
2013	2013-08-16	228	0	1.37	1.89	1.35	0.682863	0.71355	0.734412	7.17604	7.35223	6.79456
2013	2013-08-16	228	1	1.41	1.66	1.08	0.682684	0.713539	0.734413	7.09678	7.31548	6.76945
2013	2013-08-16	228	2	1.43	1.71	1.3	0.682418	0.713529	0.734409	6.98516	7.2578	6.71458
2013	2013-08-16	228	3	1.37	1.91	1.22	0.682154	0.713526	0.734434	6.9258	7.23342	6.69171
2013	2013-08-16	228	4	1.32	1.53	0.97	0.68185	0.71352	0.734452	6.89985	7.21398	6.68999
2013	2013-08-16	228	5	1.23	1.48	1.01	0.68153	0.713509	0.734459	6.81518	7.15762	6.64451
2013	2013-08-16	228	6	1.2	1.5	0.79	0.681196	0.7135	0.734454	6.70494	7.08062	6.57698
2013	2013-08-16	228	7	1.26	1.53	1.07	0.680878	0.713495	0.734432	6.55281	6.98213	6.47082
2013	2013-08-16	228	8	1.3	1.56	0.83	0.68059	0.713487	0.734407	6.44332	6.9102	6.38861
2013	2013-08-16	228	9	1.2	1.86	0.96	0.680316	0.71347	0.734364	6.32943	6.82198	6.29844
2013	2013-08-16	228	10	1.36	1.72	0.95	0.680044	0.713459	0.73432	6.17575	6.71148	6.16983
2013	2013-08-16	228	11	1.43	1.63	1.24	0.679772	0.713447	0.734282	5.98414	6.54682	6.00402
2013	2013-08-16	228	12	1.43	1.61	1.38	0.679492	0.713439	0.734237	5.99036	6.52591	5.97848
2013	2013-08-16	228	13	1.56	1.62	1.61	0.679228	0.713432	0.734206	6.04954	6.52145	5.95647
2013	2013-08-16	228	14	1.53	2.18	1.53	0.678915	0.713419	0.734176	6.25213	6.60771	6.02793
2013	2013-08-16	228	15	1.78	1.65	1.79	0.678571	0.713405	0.73415	6.45615	6.68885	6.09546
2013	2013-08-16	228	16	1.62	1.86	2.01	0.678225	0.713387	0.734124	6.62571	6.7587	6.16139
2013	2013-08-16	228	17	1.63	2.88	1.66	0.677882	0.713373	0.734101	6.74252	6.81682	6.21829
2013	2013-08-16	228	18	1.44	2.02	2.02	0.677556	0.713363	0.734075	6.86243	6.89322	6.29367
2013	2013-08-16	228	19	1.71	2.42	2.25	0.677308	0.713366	0.734041	6.96241	6.97427	6.36603
2013	2013-08-16	228	20	1.5	1.95	1.51	0.677095	0.713342	0.734013	7.00166	7.02202	6.41728
2013	2013-08-16	228	21	1.48	2.12	1.41	0.676854	0.713332	0.733983	6.97523	7.01476	6.43584
2013	2013-08-16	228	22	1.36	2.02	1.13	0.676667	0.713318	0.733954	6.90771	6.99263	6.41869
2013	2013-08-16	228	23	1.31	1.67	0.92	0.676493	0.713326	0.733923	6.81321	6.94412	6.38918
2013	2013-08-17	229	0	1.31	2.12	1.06	0.676319	0.713301	0.733887	6.70192	6.88316	6.34154
2013	2013-08-17	229	1	1.41	1.66	0.77	0.676147	0.71329	0.733841	6.56134	6.79757	6.26083
2013	2013-08-17	229	2	1.4	1.71	0.92	0.676004	0.713269	0.733799	6.3955	6.69292	6.15107
2013	2013-08-17	229	3	1.36	1.78	0.9	0.675825	0.713241	0.733759	6.25508	6.60667	6.04548
2013	2013-08-17	229	4	1.33	1.86	0.81	0.675686	0.713226	0.733715	6.118	6.51219	5.93454
2013	2013-08-17	229	5	1.25	1.67	0.89	0.675555	0.713211	0.733668	5.96273	6.3988	5.80674
2013	2013-08-17	229	6	1.28	1.72	0.82	0.675399	0.713197	0.733626	5.83592	6.303	5.69528
2013	2013-08-17	229	7	1.42	1.61	0.99	0.67527	0.713184	0.733585	5.74665	6.22632	5.6024
2013	2013-08-17	229	8	1.48	1.54	1.09	0.675157	0.71317	0.733553	5.68804	6.16775	5.53229
2013	2013-08-17	229	9	1.44	1.82	1.22	0.675049	0.713161	0.733516	5.62387	6.10049	5.45709
2013	2013-08-17	229	10	1.36	1.71	1.24	0.674948	0.713156	0.733483	5.59504	6.05307	5.40681
2013	2013-08-17	229	11	1.45	1.82	1.41	0.674854	0.713153	0.733451	5.62135	6.03507	5.3811
2013	2013-08-17	229	12	1.55	1.6	1.48	0.674744	0.713148	0.733424	5.6973	6.04505	5.37188
2013	2013-08-17	229	13	1.72	1.74	1.38	0.674584	0.713143	0.733402	5.87696	6.11646	5.42449
2013	2013-08-17	229	14	1.82	2.15	1.62	0.674407	0.713103	0.733384	6.06956	6.18833	5.48268
2013	2013-08-17	229	15	1.89	1.88	1.29	0.674212	0.713004	0.733369	6.31367	6.30068	5.58187
2013	2013-08-17	229	16	1.68	2.06	1.58	0.674032	0.712994	0.733352	6.53599	6.40752	5.67736
2013	2013-08-17	229	17	1.76	1.89	1.39	0.673831	0.712986	0.733335	6.72252	6.50611	5.7702
2013	2013-08-17	229	18	1.88	2.05	1.47	0.673644	0.712978	0.733311	6.87971	6.60686	5.86788
2013	2013-08-17	229	19	1.9	1.92	1.44	0.67348	0.712971	0.733289	6.95718	6.66228	5.93438
2013	2013-08-17	229	20	1.94	1.8	1.45	0.673332	0.712964	0.733268	6.99358	6.70511	5.99048
2013	2013-08-17	229	21	1.66	2.22	1.46	0.673203	0.712956	0.733245	7.02102	6.74776	6.04762
2013	2013-08-17	229	22	1.49	2.02	1.4	0.673067	0.712945	0.733224	7.04304	6.78744	6.10217
2013	2013-08-17	229	23	1.59	2.34	1.7	0.672945	0.712756	0.733202	7.05623	6.81793	6.14791
2013	2013-08-18	230	0	1.78	2.77	2	0.672824	0.712744	0.733179	7.06542	6.84751	6.19148
2013	2013-08-18	230	1	1.93	2.37	1.83	0.672714	0.712736	0.733154	7.07992	6.87917	6.23595
2013	2013-08-18	230	2	1.67	2.04	1.94	0.672608	0.71273	0.733132	7.08379	6.90132	6.27131
2013	2013-08-18	230	3	1.65	2.28	1.74	0.672507	0.712725	0.733109	7.08811	6.92293	6.30579
2013	2013-08-18	230	4	1.73	2.12	1.79	0.672407	0.712717	0.733078	7.08507	6.93865	6.3338
2013	2013-08-18	230	5	1.64	1.83	1.8	0.672301	0.712711	0.733043	7.07164	6.94475	6.35392
2013	2013-08-18	230	6	1.65	1.83	1.68	0.672206	0.712702	0.733018	7.06245	6.95444	6.37359
2013	2013-08-18	230	7	1.64	2.12	1.52	0.672107	0.712693	0.732988	7.05175	6.96142	6.39137
2013	2013-08-18	230	8	1.82	1.91	1.43	0.672033	0.712685	0.732957	7.04881	6.97094	6.41238
2013	2013-08-18	230	9	1.74	2.2	1.47	0.671992	0.712679	0.732934	7.03455	6.97036	6.42317
2013	2013-08-18	230	10	1.6	2.11	1.45	0.671977	0.712674	0.732903	7.03021	6.9759	6.43857
2013	2013-08-18	230	11	0.59	1.7	1.6	0.673061	0.712833	0.733334	7.04693	6.98955	6.46305
2013	2013-08-18	230	12	0.68	1.61	1.43	0.68377	0.713594	0.734749	7.06581	7.00173	6.48881
2013	2013-08-18	230	13	0.68	1.67	1.54	0.689138	0.714038	0.735432	7.07731	7.00487	6.50909
2013	2013-08-18	230	14	1.11	1.82	1.2	0.689655	0.71402	0.735678	7.10302	7.02005	6.53677
2013	2013-08-18	230	15	1.04	1.8	1.19	0.688546	0.714022	0.735694	7.20918	7.08517	6.61861
2013	2013-08-18	230	16	0.67	1.87	1.16	0.695955	0.714431	0.73625	7.33511	7.16133	6.71866
2013	2013-08-18	230	17	1.08	1.94	1.31	0.699231	0.714282	0.736151	7.47007	7.24732	6.83596
2013	2013-08-18	230	18	1.19	1.73	1.37	0.695574	0.714251	0.736005	7.58143	7.32898	6.94171
2013	2013-08-18	230	19	1	1.74	1.52	0.694626	0.714284	0.735995	7.68529	7.41898	7.04787
2013	2013-08-18	230	20	1.37	1.67	1.55	0.694563	0.714237	0.735975	7.71842	7.45756	7.10654
2013	2013-08-18	230	21	1.23	1.71	1.5	0.694269	0.714157	0.735993	7.75771	7.51111	7.17485
2013	2013-08-18	230	22	1.22	1.77	1.32	0.694092	0.714125	0.735931	7.80058	7.57236	7.24623
2013	2013-08-18	230	23	1.35	1.78	1.3	0.69288	0.714053	0.735707	7.79458	7.60095	7.28419
2013	2013-08-19	231	0	1.39	1.77	1.19	0.691711	0.713985	0.735492	7.73437	7.5978	7.28838
2013	2013-08-19	231	1	1.25	1.69	1.22	0.690572	0.71393	0.735303	7.65567	7.57799	7.26372
2013	2013-08-19	231	2	1.34	1.73	1.04	0.689761	0.713879	0.73514	7.58485	7.56699	7.24857
2013	2013-08-19	231	3	1.44	1.7	1.02	0.689041	0.71383	0.735019	7.49418	7.52566	7.21244
2013	2013-08-19	231	4	1.42	1.64	0.96	0.68821	0.713783	0.734935	7.38655	7.4719	7.1581
2013	2013-08-19	231	5	1.4	1.65	1.03	0.687556	0.713737	0.734827	7.28565	7.42305	7.10671
2013	2013-08-19	231	6	1.5	1.57	1.03	0.686964	0.713695	0.734703	7.17214	7.3523	7.04156
2013	2013-08-19	231	7	1.42	1.56	1.07	0.68638	0.713655	0.734598	7.08484	7.30205	6.99299
2013	2013-08-19	231	8	1.33	1.63	1.11	0.685746	0.71362	0.734464	6.98957	7.23951	6.93715
2013	2013-08-19	231	9	1.45	1.52	1.07	0.68522	0.713584	0.73432	6.92814	7.19581	6.89976
2013	2013-08-19	231	10	1.34	1.83	1.12	0.683975	0.713551	0.734216	6.886	7.16042	6.86941
2013	2013-08-19	231	11	1.5	1.65	1.13	0.683128	0.71354	0.734197	6.90062	7.15963	6.86696
2013	2013-08-19	231	12	1.51	1.54	1.12	0.683234	0.713608	0.734333	6.933	7.15362	6.85943
2013	2013-08-19	231	13	0.65	1.51	1.02	0.685752	0.714083	0.734804	7.08611	7.23473	6.94537
2013	2013-08-19	231	14	0.93	1.51	1.22	0.694657	0.714503	0.735998	7.08974	7.20418	6.91475
2013	2013-08-19	231	15	1.25	1.47	1.11	0.694253	0.714235	0.735876	7.15404	7.22325	6.93081
2013	2013-08-19	231	16	1.45	1.55	1.13	0.691922	0.714086	0.735626	7.29315	7.29532	7.00116
2013	2013-08-19	231	17	1.52	1.68	1.17	0.690178	0.713991	0.735425	7.41154	7.35944	7.07015
2013	2013-08-19	231	18	1.35	1.67	1.2	0.688856	0.713922	0.735246	7.48746	7.40745	7.12344
2013	2013-08-19	231	19	1.55	1.54	1.16	0.687753	0.713872	0.73509	7.53814	7.4476	7.1694
2013	2013-08-19	231	20	1.39	1.61	1.17	0.686789	0.713828	0.734985	7.53579	7.45877	7.18448
2013	2013-08-19	231	21	1.41	1.56	1.24	0.685977	0.713793	0.734897	7.53066	7.47365	7.2043
2013	2013-08-19	231	22	1.4	1.52	1.19	0.68574	0.713794	0.734914	7.53983	7.49721	7.23303
2013	2013-08-19	231	23	1.54	1.58	1.24	0.685507	0.713788	0.734903	7.51103	7.49398	7.23682
2013	2013-08-20	232	0	1.47	1.67	1.45	0.68511	0.71377	0.734856	7.48559	7.49285	7.2421
2013	2013-08-20	232	1	1.57	1.66	1.41	0.684766	0.71376	0.734826	7.49305	7.51833	7.26758
2013	2013-08-20	232	2	1.53	1.66	1.46	0.684413	0.713754	0.734794	7.46011	7.50546	7.26317
2013	2013-08-20	232	3	1.48	1.6	1.37	0.683822	0.71375	0.734744	7.43059	7.50068	7.26361
2013	2013-08-20	232	4	1.51	1.62	1.39	0.683401	0.713742	0.734678	7.41402	7.50458	7.26958
2013	2013-08-20	232	5	1.48	1.69	1.33	0.683591	0.713738	0.734831	7.41476	7.52261	7.28777
2013	2013-08-20	232	6	1.48	1.88	1.47	0.68418	0.713784	0.734963	7.38507	7.51006	7.2774
2013	2013-08-20	232	7	1.5	1.69	1.46	0.684236	0.71383	0.73502	7.35671	7.49428	7.26876
2013	2013-08-20	232	8	1.54	1.66	1.45	0.683972	0.713814	0.735	7.32118	7.47412	7.2479
2013	2013-08-20	232	9	1.63	1.73	1.41	0.683463	0.713789	0.734939	7.27963	7.44561	7.22682
2013	2013-08-20	232	10	1.57	1.83	1.37	0.68306	0.713762	0.734852	7.20802	7.39055	7.1802
2013	2013-08-20	232	11	1.58	1.71	1.5	0.682629	0.713735	0.734764	7.21641	7.38284	7.17089
2013	2013-08-20	232	12	0.96	2.17	1.62	0.682346	0.713729	0.734825	7.35631	7.46186	7.23211
2013	2013-08-20	232	13	1.53	1.93	1.62	0.68336	0.713846	0.735165	7.45705	7.48794	7.25301
2013	2013-08-20	232	14	1.78	1.77	1.81	0.684062	0.713952	0.735259	7.55912	7.52458	7.28
2013	2013-08-20	232	15	1.79	2.09	1.74	0.683839	0.713951	0.735198	7.68697	7.58108	7.32034
2013	2013-08-20	232	16	1.79	1.79	1.74	0.683367	0.713919	0.735121	7.80652	7.63194	7.35881
2013	2013-08-20	232	17	1.62	1.63	1.7	0.682977	0.714029	0.735179	7.93262	7.69837	7.4108
2013	2013-08-20	232	18	1.15	1.76	1.7	0.684981	0.714626	0.73595	8.02177	7.74953	7.44957
2013	2013-08-20	232	19	0.94	1.51	1.67	0.691083	0.714874	0.736408	8.06278	7.77907	7.47683
2013	2013-08-20	232	20	0.58	1.39	1.56	0.702652	0.715151	0.73671	8.06669	7.7953	7.49652
2013	2013-08-20	232	21	0.64	1.29	1.45	0.709283	0.715161	0.736727	8.04415	7.7928	7.5088
2013	2013-08-20	232	22	0.5	1.36	1.45	0.713265	0.715457	0.736841	8.03789	7.80847	7.53668
2013	2013-08-20	232	23	0.78	1.59	1.58	0.712631	0.71569	0.736535	8.06161	7.84741	7.58909
2013	2013-08-21	233	0	0.61	1.56	1.14	0.712357	0.716028	0.736422	8.09833	7.89376	7.67405
2013	2013-08-21	233	1	0.44	1.39	0.83	0.714273	0.716322	0.736574	8.03238	7.87897	7.68114
2013	2013-08-21	233	2	0.75	1.46	0.77	0.714761	0.716422	0.736443	7.83982	7.74488	7.54914
2013	2013-08-21	233	3	0.96	1.48	0.95	0.712295	0.716294	0.736129	7.61636	7.61533	7.3959
2013	2013-08-21	233	4	1	1.57	1.08	0.708986	0.716141	0.735872	7.43099	7.49972	7.2528
2013	2013-08-21	233	5	1.01	1.48	1.13	0.706748	0.716006	0.735654	7.28038	7.38476	7.12256
2013	2013-08-21	233	6	1.07	1.5	1	0.703896	0.715864	0.735473	7.14277	7.29098	7.00903
2013	2013-08-21	233	7	1.15	1.58	1.04	0.701302	0.715559	0.735324	7.02907	7.2135	6.92108
2013	2013-08-21	233	8	1.08	1.52	0.96	0.700108	0.714959	0.735148	6.89684	7.12657	6.82118
2013	2013-08-21	233	9	1.04	1.47	1.03	0.699112	0.714785	0.734994	6.76535	7.03711	6.7199
2013	2013-08-21	233	10	1.17	1.45	1.08	0.69818	0.71463	0.734876	6.63878	6.9449	6.61982
2013	2013-08-21	233	11	1.11	1.37	1.14	0.697311	0.714521	0.734782	6.50343	6.8212	6.49052
2013	2013-08-21	233	12	1.33	1.58	1.21	0.696333	0.714411	0.734702	6.48299	6.78564	6.45033
2013	2013-08-21	233	13	1.22	1.52	1.41	0.694914	0.71432	0.734603	6.56332	6.8397	6.50735
2013	2013-08-21	233	14	1.33	1.55	1.36	0.693812	0.714248	0.734521	6.69544	6.9008	6.54584
2013	2013-08-21	233	15	1.39	1.8	1.43	0.69285	0.714172	0.734451	6.80838	6.92509	6.55349
2013	2013-08-21	233	16	1.43	1.65	1.7	0.691837	0.714103	0.734396	6.98623	7.00565	6.61667
2013	2013-08-21	233	17	1.49	1.62	1.64	0.69091	0.714025	0.734337	7.15703	7.10515	6.69444
2013	2013-08-21	233	18	1.42	1.54	1.59	0.689946	0.713972	0.734273	7.20408	7.13269	6.71235
2013	2013-08-21	233	19	1.39	1.68	1.41	0.68905	0.713917	0.734214	7.20906	7.14803	6.72454
2013	2013-08-21	233	20	1.37	1.63	1.17	0.688242	0.713857	0.734155	7.16657	7.13595	6.72058
2013	2013-08-21	233	21	1.18	1.72	1.07	0.687401	0.713809	0.734106	7.08089	7.1075	6.6867
2013	2013-08-21	233	22	1.12	1.61	0.91	0.686313	0.713767	0.734039	6.9559	7.03776	6.61752
2013	2013-08-21	233	23	1.15	1.67	0.8	0.68526	0.713729	0.73398	6.81271	6.97837	6.52752
2013	2013-08-22	234	0	1.13	1.37	0.76	0.684692	0.713689	0.73392	6.67455	6.8847	6.4424
2013	2013-08-22	234	1	1.25	1.44	0.69	0.684039	0.713657	0.733861	6.49931	6.76531	6.31563
2013	2013-08-22	234	2	1.31	1.41	0.76	0.683568	0.713621	0.733801	6.3213	6.66488	6.17607
2013	2013-08-22	234	3	1.12	1.52	0.8	0.683088	0.713591	0.73375	6.166	6.56083	6.04948
2013	2013-08-22	234	4	1.22	1.49	0.72	0.682723	0.713562	0.733693	6.00951	6.45645	5.91981
2013	2013-08-22	234	5	1.14	1.43	0.72	0.682378	0.713522	0.733646	5.86005	6.33309	5.79702
2013	2013-08-22	234	6	1.09	1.34	0.76	0.682067	0.7135	0.733599	5.70995	6.21203	5.67272
2013	2013-08-22	234	7	1.09	1.31	0.69	0.681767	0.713476	0.733563	5.56031	6.10135	5.55022
2013	2013-08-22	234	8	1.24	1.49	0.81	0.681456	0.713447	0.733526	5.40906	5.9995	5.42245
2013	2013-08-22	234	9	1.05	1.38	0.82	0.68115	0.71343	0.733529	5.24849	5.89849	5.28436
2013	2013-08-22	234	10	1.29	1.35	0.87	0.680885	0.713382	0.733457	5.11026	5.78042	5.15472
2013	2013-08-22	234	11	1.34	1.36	0.8	0.680599	0.713139	0.733411	4.99592	5.66835	5.03113
2013	2013-08-22	234	12	1.14	1.48	0.95	0.680333	0.713121	0.733356	4.93396	5.58869	4.95402
2013	2013-08-22	234	13	1.33	1.51	0.96	0.680016	0.713105	0.733322	4.89236	5.52397	4.87579
2013	2013-08-22	234	14	1.21	1.59	1.3	0.679686	0.713087	0.733292	5.00581	5.58459	4.9109
2013	2013-08-22	234	15	1.37	1.59	1.2	0.679394	0.713069	0.733274	5.13228	5.62707	4.94103
2013	2013-08-22	234	16	1.2	1.57	1.36	0.67906	0.713052	0.733254	5.26144	5.66545	4.97124
2013	2013-08-22	234	17	1.44	1.66	1.4	0.678737	0.713033	0.733234	5.38765	5.7241	5.01907
2013	2013-08-22	234	18	1.23	1.52	1.33	0.678404	0.713017	0.733218	5.46807	5.78699	5.06669
2013	2013-08-22	234	19	1.21	1.52	1.02	0.678111	0.713002	0.73321	5.51323	5.84354	5.10719
2013	2013-08-22	234	20	1.14	1.45	0.93	0.677808	0.712989	0.733191	5.48299	5.83485	5.10587
2013	2013-08-22	234	21	1.22	1.49	0.71	0.677562	0.712974	0.733174	5.39935	5.78478	5.06825
2013	2013-08-22	234	22	1.23	1.47	0.7	0.677341	0.712963	0.733154	5.2672	5.71666	4.98774
2013	2013-08-22	234	23	1.06	1.33	0.8	0.677166	0.712951	0.733134	5.13268	5.61668	4.90261
2013	2013-08-23	235	0	1.2	1.32	0.73	0.676952	0.712946	0.733111	5.01683	5.55049	4.82605
2013	2013-08-23	235	1	1.06	1.31	0.67	0.676747	0.712936	0.73309	4.90382	5.4739	4.74865
2013	2013-08-23	235	2	1.05	1.32	0.73	0.676591	0.712924	0.733066	4.77261	5.3791	4.65202
2013	2013-08-23	235	3	1.24	1.3	0.75	0.676416	0.712913	0.733041	4.64051	5.29283	4.54783
2013	2013-08-23	235	4	1.23	1.36	0.94	0.676284	0.712905	0.733019	4.55256	5.23285	4.47118
2013	2013-08-23	235	5	1.12	1.6	0.77	0.676135	0.712896	0.732995	4.47826	5.18117	4.3984
2013	2013-08-23	235	6	1.05	1.5	0.84	0.675963	0.712887	0.73298	4.39913	5.11783	4.33364
2013	2013-08-23	235	7	1.1	1.52	0.69	0.675757	0.712878	0.732964	4.29972	5.04167	4.25005
2013	2013-08-23	235	8	1.02	1.5	0.72	0.67565	0.712874	0.732953	4.20247	4.94097	4.17134
2013	2013-08-23	235	9	1.18	1.41	0.65	0.675528	0.712864	0.732936	4.10159	4.88186	4.08217
2013	2013-08-23	235	10	1	1.41	0.68	0.675413	0.712855	0.732906	4.00861	4.82312	3.99334
2013	2013-08-23	235	11	1.28	1.39	0.79	0.675296	0.712838	0.73288	3.91452	4.73912	3.89485
2013	2013-08-23	235	12	1.2	1.29	0.88	0.675169	0.712822	0.732857	3.87605	4.69725	3.85786
2013	2013-08-23	235	13	1.31	1.33	0.94	0.675035	0.712807	0.732831	3.86043	4.67587	3.82526
2013	2013-08-23	235	14	1.21	1.35	0.93	0.674864	0.712794	0.732812	3.98749	4.74814	3.88461
2013	2013-08-23	235	15	1.2	1.74	1.06	0.674699	0.712781	0.732794	4.0782	4.7715	3.90252
2013	2013-08-23	235	16	1.17	1.48	0.99	0.674533	0.712766	0.732779	4.17049	4.78189	3.93375
2013	2013-08-23	235	17	1.17	1.4	0.97	0.674364	0.712752	0.732767	4.23681	4.80479	3.96462
2013	2013-08-23	235	18	1.23	1.52	1.06	0.674204	0.712735	0.732753	4.28623	4.83566	3.99442
2013	2013-08-23	235	19	1.11	1.32	0.81	0.674061	0.71272	0.732738	4.30864	4.88777	4.02208
2013	2013-08-23	235	20	0.98	1.24	0.74	0.673933	0.712707	0.732703	4.27839	4.86336	4.018
2013	2013-08-23	235	21	1.08	1.32	0.71	0.673823	0.712694	0.732687	4.19107	4.82581	3.96756
2013	2013-08-23	235	22	1	1.37	0.69	0.673728	0.712683	0.732676	4.09988	4.75994	3.91516
2013	2013-08-23	235	23	1.05	1.31	0.65	0.673631	0.712675	0.732662	4.00578	4.68955	3.8579
2013	2013-08-24	236	0	1.08	1.3	0.62	0.673536	0.712664	0.732665	3.90818	4.63202	3.79443
2013	2013-08-24	236	1	0.97	1.34	0.57	0.673445	0.712654	0.732663	3.82002	4.49064	3.71054
2013	2013-08-24	236	2	0.95	1.4	0.64	0.673341	0.712646	0.732663	3.74135	4.4495	3.63122
2013	2013-08-24	236	3	1.21	1.35	0.61	0.673218	0.712641	0.732658	3.67384	4.39073	3.55474
2013	2013-08-24	236	4	0.97	1.17	0.6	0.673111	0.712634	0.73265	3.6123	4.33005	3.47886
2013	2013-08-24	236	5	1.06	1.34	0.5	0.673001	0.712627	0.732642	3.556	4.28816	3.40365
2013	2013-08-24	236	6	1.03	1.09	0.49	0.672889	0.71262	0.732632	3.50007	4.23174	3.33307
2013	2013-08-24	236	7	1.09	1.3	0.51	0.672791	0.712611	0.732617	3.42954	4.17434	3.247
2013	2013-08-24	236	8	1.02	1.09	0.54	0.672764	0.712605	0.732601	3.38871	4.13413	3.18624
2013	2013-08-24	236	9	1.04	1.12	0.59	0.672648	0.712599	0.732579	3.33116	4.066	3.1189
2013	2013-08-24	236	10	1	1.11	0.64	0.672552	0.71259	0.73254	3.25216	3.9867	3.03502
2013	2013-08-24	236	11	0.92	1.18	0.75	0.67249	0.712583	0.73249	3.20849	3.95144	2.98273
2013	2013-08-24	236	12	0.88	1.46	0.71	0.672436	0.712576	0.732449	3.20238	3.9838	2.98386
2013	2013-08-24	236	13	1	1.28	0.77	0.672381	0.712566	0.732435	3.1783	3.92727	2.97768
2013	2013-08-24	236	14	1.05	1.21	0.93	0.672333	0.712559	0.732431	3.24343	3.98789	3.04854
2013	2013-08-24	236	15	1.05	1.66	0.85	0.672314	0.712551	0.732422	3.27044	4.018	3.08833
2013	2013-08-24	236	16	1.04	1.22	0.88	0.672311	0.712546	0.732415	3.29894	4.03921	3.11747
2013	2013-08-24	236	17	1.01	1.25	0.91	0.672293	0.71254	0.732407	3.37764	4.08791	3.16226
2013	2013-08-24	236	18	1.22	1.25	0.99	0.672275	0.712532	0.732397	3.44562	4.12326	3.19293
2013	2013-08-24	236	19	1.23	1.24	1.02	0.672241	0.712527	0.732385	3.49342	4.15679	3.21491
2013	2013-08-24	236	20	1.32	1.26	1.06	0.672208	0.712521	0.732379	3.51277	4.1875	3.21711
2013	2013-08-24	236	21	1	1.37	0.79	0.672171	0.712515	0.732372	3.51051	4.1971	3.22003
2013	2013-08-24	236	22	1.12	1.31	0.71	0.672132	0.712508	0.732366	3.46549	4.13873	3.19267
2013	2013-08-24	236	23	1.18	1.11	0.68	0.672088	0.712503	0.732356	3.40288	4.10592	3.15151
2013	2013-08-25	237	0	0.9	1.13	0.64	0.672056	0.712498	0.732348	3.3423	4.05261	3.10733
2013	2013-08-25	237	1	0.98	1.15	0.73	0.672022	0.712493	0.732339	3.30763	4.02689	3.07375
2013	2013-08-25	237	2	1.06	1.13	0.76	0.671982	0.712486	0.732325	3.27479	3.98176	3.03955
2013	2013-08-25	237	3	1.02	1.13	0.68	0.671934	0.712481	0.732314	3.2424	3.95605	3.00597
2013	2013-08-25	237	4	1.17	1.12	0.6	0.671891	0.712474	0.732302	3.20972	3.90891	2.97459
2013	2013-08-25	237	5	1	1.18	0.7	0.671834	0.712467	0.732291	3.18173	3.87316	2.94523
2013	2013-08-25	237	6	0.89	1.17	0.63	0.671776	0.712458	0.732278	3.14423	3.83652	2.90276
2013	2013-08-25	237	7	0.04	1.24	0.73	0.671722	0.712451	0.732264	3.10644	3.80187	2.85821
2013	2013-08-25	237	8	0.03	1.25	0.66	0.671662	0.712446	0.732251	3.09321	3.77956	2.83472
2013	2013-08-25	237	9	0.04	1.11	0.63	0.671606	0.712442	0.732236	3.04179	3.72733	2.7801
2013	2013-08-25	237	10	0.88	1.11	0.77	0.671574	0.712441	0.732221	2.96746	3.65699	2.71004
2013	2013-08-25	237	11	0.94	1.16	0.83	0.671527	0.712437	0.732199	2.95901	3.64858	2.69775
2013	2013-08-25	237	12	0.95	1.16	0.98	0.671447	0.712431	0.732181	2.95072	3.61502	2.69988
2013	2013-08-25	237	13	1.12	1.18	0.94	0.671378	0.712427	0.732168	2.94726	3.6689	2.69518
2013	2013-08-25	237	14	1.04	1.19	1.13	0.671317	0.712417	0.732162	3.11783	3.78813	2.80394
2013	2013-08-25	237	15	1.22	1.51	1.13	0.671267	0.712411	0.732142	3.28307	3.88347	2.87912
2013	2013-08-25	237	16	1.17	1.34	1.14	0.671184	0.71239	0.732122	3.44476	3.95883	2.95075
2013	2013-08-25	237	17	1.12	1.28	1.07	0.671097	0.712378	0.7321	3.57906	4.02753	3.00687
2013	2013-08-25	237	18	1.04	1.25	0.95	0.671001	0.712371	0.732086	3.70304	4.11423	3.0752
2013	2013-08-25	237	19	1.22	1.37	1.17	0.670912	0.712363	0.732076	3.79453	4.18347	3.13227
2013	2013-08-25	237	20	1.19	1.35	1.04	0.670821	0.712354	0.732071	3.83453	4.2259	3.16983
2013	2013-08-25	237	21	1.07	1.3	0.95	0.670734	0.712345	0.732067	3.82327	4.24216	3.17347
2013	2013-08-25	237	22	1.23	1.29	0.76	0.670679	0.712329	0.732067	3.78506	4.24025	3.16854
2013	2013-08-25	237	23	1.27	1.4	0.68	0.670656	0.712317	0.732066	3.7336	4.20726	3.15655
2013	2013-08-26	238	0	1.03	1.4	0.82	0.670603	0.712306	0.732067	3.65717	4.1534	3.11766
2013	2013-08-26	238	1	0.97	1.33	0.72	0.670553	0.712296	0.732069	3.60477	4.12441	3.09625
2013	2013-08-26	238	2	0.94	1.25	0.71	0.670491	0.712287	0.73207	3.53047	4.07328	3.05133
2013	2013-08-26	238	3	0.98	1.33	0.73	0.670441	0.712279	0.732071	3.45688	4.03393	3.00241
2013	2013-08-26	238	4	1.09	1.2	0.78	0.670395	0.712272	0.732072	3.39514	3.9813	2.95945
2013	2013-08-26	238	5	0.95	1.2	0.81	0.670358	0.712267	0.732073	3.34091	3.93668	2.92174
2013	2013-08-26	238	6	1.11	1.33	0.88	0.670332	0.712262	0.732073	3.31059	3.90855	2.89905
2013	2013-08-26	238	7	1.12	1.31	0.8	0.670302	0.712257	0.732073	3.29827	3.89029	2.88347
2013	2013-08-26	238	8	1.04	1.15	0.9	0.670272	0.712253	0.73207	3.29751	3.8794	2.87359
2013	2013-08-26	238	9	0.96	1.19	0.82	0.670244	0.712249	0.732065	3.3126	3.87557	2.87764
2013	2013-08-26	238	10	1	1.31	0.95	0.670228	0.712241	0.73205	3.34863	3.87808	2.88716
2013	2013-08-26	238	11	1.06	1.24	1.07	0.670214	0.712237	0.732035	3.37746	3.88273	2.88225
2013	2013-08-26	238	12	0.95	1.18	1.09	0.67028	0.712232	0.732008	3.47591	3.92544	2.92569
2013	2013-08-26	238	13	0.33	1.08	1.11	0.672848	0.712659	0.732404	3.61498	3.98207	2.97952
2013	2013-08-26	238	14	0.31	1.02	1.17	0.686838	0.714067	0.73408	3.77616	4.04478	3.05252
2013	2013-08-26	238	15	0.32	0.93	1.32	0.710623	0.715005	0.735715	3.90106	4.08342	3.10694
2013	2013-08-26	238	16	0.19	0.95	1.38	0.71627	0.715132	0.736348	4.01988	4.16364	3.18402
2013	2013-08-26	238	17	0.25	0.94	1.48	0.718114	0.715102	0.736513	4.16298	4.2564	3.27413
2013	2013-08-26	238	18	0.39	1.07	1.49	0.718176	0.715107	0.736439	4.35536	4.37843	3.4049
2013	2013-08-26	238	19	0.37	0.99	1.6	0.718709	0.715874	0.736452	4.59456	4.59689	3.5924
2013	2013-08-26	238	20	0.27	0.99	1.22	0.728032	0.716566	0.736763	4.8316	4.87854	3.7884
2013	2013-08-26	238	21	0.31	0.98	1.29	0.735427	0.716875	0.73683	5.08003	5.15406	4.00983
2013	2013-08-26	238	22	0.45	1.04	1.34	0.737594	0.716998	0.736782	5.29722	5.40512	4.23937
2013	2013-08-26	238	23	0.41	0.95	1.57	0.742475	0.717159	0.73686	5.49153	5.61176	4.46265
2013	2013-08-27	239	0	0.3	0.92	1.38	0.753949	0.71752	0.736955	5.69374	5.80321	4.6983
2013	2013-08-27	239	1	0.44	0.93	1.49	0.754785	0.717601	0.736812	5.88442	5.98119	4.92642
2013	2013-08-27	239	2	0.5	0.91	1.57	0.754569	0.717629	0.737196	6.07568	6.11914	5.13079
2013	2013-08-27	239	3	0.74	1.01	1.74	0.749229	0.7175	0.736913	6.25439	6.24663	5.32062
2013	2013-08-27	239	4	0.78	0.99	1.7	0.741861	0.717299	0.736732	6.39703	6.33338	5.48094
2013	2013-08-27	239	5	0.92	1.04	1.42	0.734184	0.7171	0.736423	6.52474	6.40525	5.62238
2013	2013-08-27	239	6	1.06	1.07	2.04	0.727408	0.716905	0.73616	6.63257	6.47245	5.74981
2013	2013-08-27	239	7	1.06	1.08	1.79	0.722898	0.716714	0.735941	6.70189	6.51178	5.8461
2013	2013-08-27	239	8	1.11	1.15	2.19	0.719128	0.716556	0.735745	6.74557	6.53399	5.91716
2013	2013-08-27	239	9	1.26	1.12	1.65	0.715387	0.716368	0.735572	6.77452	6.54347	5.9725
2013	2013-08-27	239	10	1.27	1.24	2.07	0.7118	0.716146	0.735458	6.81338	6.5517	6.02436
2013	2013-08-27	239	11	1.22	1.07	2.55	0.709836	0.715605	0.735379	6.85022	6.5448	6.05773
2013	2013-08-27	239	12	1.45	1.22	1.85	0.708113	0.715102	0.735298	6.95541	6.57708	6.11266
2013	2013-08-27	239	13	1.45	1.19	2.7	0.706423	0.714876	0.735229	7.11792	6.64387	6.18413
2013	2013-08-27	239	14	1.53	1.29	2.64	0.704906	0.714704	0.735167	7.36665	6.75587	6.3046
2013	2013-08-27	239	15	1.51	1.41	2.59	0.703463	0.714584	0.735104	7.549	6.82218	6.38607
2013	2013-08-27	239	16	1.5	1.39	2.34	0.701867	0.714458	0.735039	7.70309	6.88417	6.46636
2013	2013-08-27	239	17	1.49	1.34	1.99	0.700067	0.714338	0.734965	7.83157	6.94452	6.54322
2013	2013-08-27	239	18	1.53	1.27	1.94	0.698467	0.714247	0.734896	7.90546	6.97875	6.59785
2013	2013-08-27	239	19	1.51	1.41	1.78	0.696921	0.714175	0.73481	7.94182	7.00659	6.64603
2013	2013-08-27	239	20	1.57	1.4	1.81	0.695253	0.7141	0.734709	7.95767	7.03132	6.69484
2013	2013-08-27	239	21	1.51	1.41	1.68	0.693893	0.714019	0.73465	7.97015	7.0563	6.75024
2013	2013-08-27	239	22	1.51	1.34	1.69	0.692886	0.713958	0.734586	7.97951	7.08405	6.80632
2013	2013-08-27	239	23	1.06	1.34	1.47	0.692093	0.713921	0.73464	7.99443	7.12028	6.86717
2013	2013-08-28	240	0	1.2	1.45	1.52	0.692022	0.713909	0.734842	8.01384	7.15709	6.93105
2013	2013-08-28	240	1	1.34	1.43	1.5	0.692667	0.713996	0.735059	8.04032	7.1931	7.00019
2013	2013-08-28	240	2	1.52	1.42	1.97	0.692864	0.713996	0.735145	8.05907	7.22385	7.0646
2013	2013-08-28	240	3	1.6	1.43	1.79	0.692491	0.713973	0.735163	8.08527	7.26279	7.13238
2013	2013-08-28	240	4	1.78	1.46	1.92	0.691804	0.713947	0.735137	8.10707	7.29976	7.19337
2013	2013-08-28	240	5	1.38	1.38	2	0.691114	0.713943	0.735139	8.12371	7.33067	7.24554
2013	2013-08-28	240	6	0.88	1.37	1.93	0.692948	0.714197	0.735469	8.14069	7.36028	7.29307
2013	2013-08-28	240	7	0.63	1.35	1.83	0.702073	0.714684	0.736319	8.1686	7.39842	7.34798
2013	2013-08-28	240	8	0.84	1.32	1.64	0.703662	0.714694	0.736365	8.20085	7.44509	7.41516
2013	2013-08-28	240	9	0.6	1.38	2.2	0.708594	0.714864	0.736693	8.23946	7.49108	7.48584
2013	2013-08-28	240	10	0.61	1.37	2.07	0.711419	0.71495	0.736824	8.27597	7.53379	7.55996
2013	2013-08-28	240	11	0.53	1.37	2.04	0.713881	0.715042	0.736885	8.3305	7.57618	7.63924
2013	2013-08-28	240	12	0.68	1.32	1.8	0.713746	0.715109	0.736781	8.40494	7.61575	7.72714
2013	2013-08-28	240	13	1.03	1.44	1.83	0.712752	0.715194	0.736596	8.50917	7.66361	7.82188
2013	2013-08-28	240	14	1.2	1.4	1.96	0.710354	0.715175	0.736363	8.60595	7.69371	7.90207
2013	2013-08-28	240	15	1.5	1.47	1.71	0.707183	0.715117	0.736159	8.69623	7.72459	7.97402
2013	2013-08-28	240	16	1.58	1.48	2.03	0.704192	0.71503	0.73601	8.77613	7.75479	8.03723
2013	2013-08-28	240	17	1.59	1.6	1.61	0.702957	0.714919	0.735856	8.83801	7.77938	8.09152
2013	2013-08-28	240	18	1.59	1.55	1.79	0.702026	0.714823	0.735733	8.88232	7.79764	8.13674
2013	2013-08-28	240	19	1.49	1.58	1.98	0.701426	0.714745	0.735671	8.90465	7.8059	8.16619
2013	2013-08-28	240	20	1.46	1.57	1.96	0.700913	0.714679	0.735622	8.92101	7.82064	8.20097
2013	2013-08-28	240	21	1.43	1.51	2.02	0.700538	0.714625	0.735609	8.92755	7.82747	8.22842
2013	2013-08-28	240	22	1.45	1.57	2.07	0.700246	0.714588	0.735652	8.92995	7.83566	8.2534
2013	2013-08-28	240	23	1.59	1.49	2.06	0.699873	0.714532	0.735682	8.93035	7.84159	8.27754
2013	2013-08-29	241	0	1.68	1.61	2.05	0.699288	0.714491	0.735694	8.93022	7.84704	8.29816
2013	2013-08-29	241	1	1.54	1.53	1.9	0.698253	0.714445	0.735666	8.92703	7.85435	8.31591
2013	2013-08-29	241	2	1.56	1.54	2.42	0.697296	0.714391	0.735616	8.92499	7.86111	8.33298
2013	2013-08-29	241	3	1.77	1.59	2.17	0.696163	0.714341	0.735565	8.92544	7.87166	8.35079
2013	2013-08-29	241	4	1.91	1.62	2.3	0.695217	0.714297	0.735525	8.92438	7.87867	8.36619
2013	2013-08-29	241	5	1.56	1.64	2.18	0.694444	0.714263	0.735479	8.92194	7.88782	8.37941
2013	2013-08-29	241	6	1.74	1.62	2.31	0.693795	0.714246	0.735485	8.91826	7.89456	8.39063
2013	2013-08-29	241	7	1.67	1.57	2.23	0.693435	0.714287	0.735543	8.91393	7.90246	8.40066
2013	2013-08-29	241	8	1.58	1.57	2.28	0.693209	0.714296	0.735606	8.90501	7.90726	8.40901
2013	2013-08-29	241	9	1.42	1.64	2.09	0.693593	0.714382	0.735842	8.90164	7.91334	8.41529
2013	2013-08-29	241	10	1.55	1.56	2.02	0.69401	0.71439	0.735948	8.90447	7.92024	8.42394
2013	2013-08-29	241	11	1.61	1.58	2.1	0.694052	0.714427	0.736027	8.92233	7.93322	8.43443
2013	2013-08-29	241	12	1.89	1.6	1.96	0.693878	0.714421	0.736018	8.97545	7.95898	8.45486
2013	2013-08-29	241	13	2.01	1.68	1.87	0.693329	0.714388	0.735966	9.07369	8.00623	8.48988
2013	2013-08-29	241	14	2.09	1.74	2.13	0.69247	0.714347	0.73591	9.22392	8.07589	8.54733
2013	2013-08-29	241	15	2.1	1.69	2.06	0.691598	0.714302	0.735846	9.40002	8.16775	8.62028
2013	2013-08-29	241	16	2.14	1.77	1.81	0.690808	0.714266	0.73578	9.55373	8.24707	8.68452
2013	2013-08-29	241	17	2.23	1.78	1.92	0.690095	0.71423	0.735715	9.67545	8.31583	8.74319
2013	2013-08-29	241	18	1.97	1.92	1.95	0.688988	0.714199	0.735656	9.75367	8.36871	8.79064
2013	2013-08-29	241	19	1.96	1.75	1.8	0.688214	0.714158	0.735589	9.78235	8.40358	8.82003
2013	2013-08-29	241	20	1.9	1.85	1.86	0.687363	0.714109	0.735523	9.76974	8.42016	8.83401
2013	2013-08-29	241	21	1.95	2.11	1.75	0.686298	0.714074	0.735451	9.74045	8.42828	8.84263
2013	2013-08-29	241	22	1.96	1.93	1.82	0.685708	0.714048	0.735292	9.70751	8.43376	8.85018
2013	2013-08-29	241	23	1.95	1.87	1.73	0.685254	0.714025	0.735191	9.67001	8.43562	8.85307
2013	2013-08-30	242	0	1.95	1.88	1.79	0.68467	0.714015	0.73514	9.63226	8.43702	8.85622
2013	2013-08-30	242	1	1.77	1.86	1.75	0.684317	0.714002	0.735199	9.59957	8.44066	8.86081
2013	2013-08-30	242	2	1.46	1.97	1.95	0.68463	0.714005	0.735418	9.57566	8.44815	8.8694
2013	2013-08-30	242	3	1.21	1.74	1.92	0.685364	0.714131	0.735655	9.55036	8.45388	8.87531
2013	2013-08-30	242	4	1.26	1.71	1.63	0.687255	0.714428	0.736069	9.51799	8.45251	8.87472
2013	2013-08-30	242	5	0.97	1.77	1.7	0.691546	0.714749	0.736473	9.50013	8.46331	8.88549
2013	2013-08-30	242	6	1.27	1.93	1.44	0.692882	0.714751	0.736455	9.4836	8.47504	8.89986
2013	2013-08-30	242	7	1.71	1.73	1.67	0.692415	0.714679	0.736325	9.46746	8.48447	8.91227
2013	2013-08-30	242	8	1.27	1.78	1.62	0.692301	0.714675	0.736283	9.45094	8.4911	8.9213
2013	2013-08-30	242	9	1.35	1.73	1.69	0.693444	0.714732	0.736378	9.43816	8.49846	8.93009
2013	2013-08-30	242	10	1.03	1.72	1.92	0.695043	0.714843	0.73656	9.43311	8.50685	8.93996
2013	2013-08-30	242	11	0.78	1.68	2.06	0.700967	0.715139	0.736912	9.45488	8.52631	8.96112
2013	2013-08-30	242	12	0.66	1.62	1.86	0.705134	0.715178	0.736948	9.49288	8.56552	8.99787
2013	2013-08-30	242	13	1.59	1.93	1.74	0.704135	0.715025	0.736656	9.55245	8.59918	9.03398
2013	2013-08-30	242	14	1.89	1.93	2.03	0.699128	0.714907	0.736377	9.67245	8.64845	9.089
2013	2013-08-30	242	15	1.78	1.91	1.94	0.697309	0.714847	0.736182	9.83218	8.71381	9.15732
2013	2013-08-30	242	16	1.99	2.06	1.81	0.697042	0.714797	0.735997	9.95854	8.76265	9.21009
2013	2013-08-30	242	17	1.87	2.02	2.17	0.799117	0.714749	0.73584	10.0347	8.79013	9.24464
2013	2013-08-30	242	18	1.89	1.91	1.94	0.80009	0.714693	0.735694	10.0834	8.81283	9.27444
2013	2013-08-30	242	19	1.91	1.89	2.22	0.798745	0.71464	0.735579	10.0968	8.82137	9.29168
2013	2013-08-30	242	20	1.64	1.87	2.16	0.798163	0.714625	0.735581	10.0787	8.81415	9.29441
2013	2013-08-30	242	21	1.57	1.78	2.27	0.798199	0.714697	0.735747	10.058	8.81041	9.3003
2013	2013-08-30	242	22	1.21	1.93	2.19	0.798794	0.714745	0.735903	10.042	8.81152	9.30992
2013	2013-08-30	242	23	0.68	1.78	2.24	0.80363	0.715007	0.736364	10.0255	8.81559	9.32027
2013	2013-08-31	243	0	0.75	1.94	2.12	0.765896	0.715201	0.736731	10.0034	8.82644	9.33478
2013	2013-08-31	243	1	0.7	1.79	2.39	0.703292	0.715297	0.736867	9.97746	8.83808	9.35318
2013	2013-08-31	243	2	1.2	1.66	2.5	0.703703	0.715208	0.736685	9.94817	8.83925	9.36638
2013	2013-08-31	243	3	0.67	1.99	2.33	0.70703	0.715462	0.73698	9.91992	8.84349	9.37893
2013	2013-08-31	243	4	0.8	1.74	2.11	0.707139	0.715408	0.736784	9.88686	8.84019	9.38914
2013	2013-08-31	243	5	0.68	1.55	1.93	0.708055	0.715633	0.737067	9.85017	8.82416	9.39256
2013	2013-08-31	243	6	0.57	1.55	1.91	0.711496	0.715944	0.737254	9.81466	8.81226	9.39747
2013	2013-08-31	243	7	1.06	1.61	2.06	0.711966	0.716108	0.737016	9.78758	8.80737	9.41128
2013	2013-08-31	243	8	1.43	1.67	2.13	0.709435	0.71601	0.736733	9.74363	8.77377	9.40143
2013	2013-08-31	243	9	1.51	1.81	2.09	0.706865	0.71582	0.736465	9.69708	8.73312	9.38307
2013	2013-08-31	243	10	1.51	1.78	2.37	0.703433	0.715642	0.736269	9.66594	8.69706	9.36336
2013	2013-08-31	243	11	1.63	1.85	2.08	0.701405	0.715494	0.736087	9.67755	8.68465	9.3596
2013	2013-08-31	243	12	1.66	2.03	2.36	0.700391	0.715332	0.735893	9.71419	8.68601	9.36052
2013	2013-08-31	243	13	1.71	2	2.11	0.69943	0.715211	0.735728	9.76593	8.69939	9.36662
2013	2013-08-31	243	14	1.84	2.13	2.01	0.698679	0.715114	0.735612	9.81074	8.70241	9.36362
2013	2013-08-31	243	15	1.8	1.87	2.04	0.697884	0.715025	0.73551	9.9202	8.74938	9.39927
2013	2013-08-31	243	16	1.62	1.93	1.93	0.775738	0.714972	0.735485	10.0209	8.78993	9.43073
2013	2013-08-31	243	17	1.66	2.03	1.88	0.803934	0.714939	0.735527	10.0931	8.82486	9.45532
2013	2013-08-31	243	18	1.66	1.9	2	0.802182	0.714897	0.735554	10.1405	8.85714	9.48028
2013	2013-08-31	243	19	0.83	1.63	1.88	0.807212	0.715322	0.736475	10.1664	8.89478	9.50419
2013	2013-08-31	243	20	1.29	1.79	2.05	0.80976	0.71519	0.73652	10.1475	8.90912	9.51376
2013	2013-08-31	243	21	1.69	1.88	2.13	0.80798	0.715086	0.736365	10.1103	8.90655	9.51123
2013	2013-08-31	243	22	1.74	1.82	2.1	0.8061	0.714983	0.736267	10.0696	8.90121	9.50834
2013	2013-08-31	243	23	1.02	1.75	1.76	0.805114	0.71499	0.736254	10.0611	8.92563	9.53017
2013	2013-09-01	244	0	1.25	1.85	1.87	0.75746	0.715188	0.736553	10.0037	8.91565	9.50801
2013	2013-09-01	244	1	1.57	1.75	2.1	0.698902	0.715078	0.736461	9.93437	8.88782	9.48501
2013	2013-09-01	244	2	1.73	1.85	1.76	0.697648	0.714978	0.7363	9.87616	8.87434	9.46711
2013	2013-09-01	244	3	1.6	1.82	1.71	0.696561	0.714903	0.736144	9.79709	8.83763	9.42374
2013	2013-09-01	244	4	1.79	1.78	1.58	0.695516	0.714842	0.73601	9.72377	8.80311	9.39048
2013	2013-09-01	244	5	1.69	1.79	1.4	0.694615	0.714777	0.735862	9.60761	8.74388	9.32541
2013	2013-09-01	244	6	1.65	1.68	1.61	0.693681	0.714719	0.735737	9.48596	8.6854	9.25502
2013	2013-09-01	244	7	1.71	1.87	1.48	0.692963	0.714674	0.735614	9.35881	8.61924	9.17489
2013	2013-09-01	244	8	1.63	1.89	1.57	0.692348	0.714638	0.735529	9.23812	8.54068	9.098
2013	2013-09-01	244	9	1.57	1.83	1.54	0.691757	0.714605	0.735463	9.13136	8.47943	9.02087
2013	2013-09-01	244	10	1.73	1.72	1.71	0.69106	0.714579	0.735424	9.02711	8.40701	8.935
2013	2013-09-01	244	11	1.69	1.77	1.99	0.690394	0.714561	0.735354	8.94891	8.3246	8.85496
2013	2013-09-01	244	12	1.72	1.87	1.85	0.689806	0.714539	0.735302	9.01971	8.36415	8.87356
2013	2013-09-01	244	13	1.84	1.96	1.97	0.689253	0.714512	0.73526	9.04807	8.37426	8.85056
2013	2013-09-01	244	14	1.96	1.89	1.91	0.688694	0.714467	0.735229	9.15333	8.42004	8.8728
2013	2013-09-01	244	15	1.83	2	2.12	0.688083	0.714432	0.735198	9.25268	8.45675	8.88104
2013	2013-09-01	244	16	1.83	1.94	2.02	0.687306	0.714399	0.735113	9.35077	8.49527	8.88808
2013	2013-09-01	244	17	1.93	1.99	1.95	0.686463	0.714361	0.735036	9.43715	8.53198	8.90592
2013	2013-09-01	244	18	1.98	1.84	1.84	0.686001	0.714319	0.734974	9.51116	8.57106	8.92729
2013	2013-09-01	244	19	1.93	1.94	1.79	0.685494	0.714284	0.734918	9.51278	8.58129	8.9241
2013	2013-09-01	244	20	1.86	1.84	1.69	0.685064	0.714258	0.734894	9.47726	8.56918	8.89464
2013	2013-09-01	244	21	1.88	1.87	1.34	0.684688	0.714234	0.734868	9.40103	8.53627	8.8617
2013	2013-09-01	244	22	1.7	1.82	1.26	0.684332	0.714206	0.734835	9.29653	8.4737	8.81607
2013	2013-09-01	244	23	1.68	1.82	1.07	0.683972	0.714177	0.734801	9.15248	8.40534	8.7328
2013	2013-09-02	245	0	1.6	1.87	1.08	0.683703	0.714148	0.734755	8.9812	8.30805	8.62161
2013	2013-09-02	245	1	1.61	1.93	0.95	0.683438	0.714119	0.734682	8.78739	8.19083	8.47813
2013	2013-09-02	245	2	1.5	1.93	0.88	0.683136	0.714096	0.734634	8.57975	8.0483	8.3195
2013	2013-09-02	245	3	1.44	1.98	0.88	0.682838	0.714072	0.734582	8.37009	7.90755	8.151
2013	2013-09-02	245	4	1.57	1.73	0.84	0.682557	0.714047	0.734531	8.16296	7.76425	7.9823
2013	2013-09-02	245	5	1.41	1.67	0.79	0.682301	0.714018	0.734487	7.93474	7.63478	7.78636
2013	2013-09-02	245	6	1.5	1.87	0.8	0.682076	0.713994	0.734444	7.72758	7.46463	7.58977
2013	2013-09-02	245	7	1.36	1.71	0.75	0.681865	0.713976	0.734403	7.53413	7.34482	7.40585
2013	2013-09-02	245	8	1.48	1.59	0.84	0.681654	0.713959	0.734364	7.32601	7.18626	7.21186
2013	2013-09-02	245	9	1.38	1.59	0.92	0.681431	0.713943	0.734325	7.11755	7.04125	7.01304
2013	2013-09-02	245	10	1.4	1.66	1.16	0.681245	0.713929	0.734274	6.93304	6.88973	6.82207
2013	2013-09-02	245	11	1.49	1.8	1.5	0.681074	0.713917	0.734237	6.67034	6.6445	6.54901
2013	2013-09-02	245	12	1.5	2.14	1.65	0.680887	0.713901	0.734191	6.69668	6.57731	6.4717
2013	2013-09-02	245	13	1.77	1.78	2.13	0.680653	0.713889	0.734157	6.88648	6.75981	6.5748
2013	2013-09-02	245	14	1.79	2.12	1.89	0.680347	0.713872	0.73415	7.01671	6.81332	6.59969
2013	2013-09-02	245	15	1.73	2.03	2.07	0.679937	0.713854	0.734135	7.21708	6.89748	6.65775
2013	2013-09-02	245	16	1.72	1.96	2.13	0.679557	0.713839	0.734109	7.39744	6.96302	6.69913
2013	2013-09-02	245	17	1.79	1.88	2.37	0.67928	0.713751	0.734077	7.54258	7.03314	6.76003
2013	2013-09-02	245	18	1.7	1.91	2.39	0.678999	0.713395	0.734055	7.66822	7.1199	6.838
2013	2013-09-02	245	19	1.68	1.75	1.53	0.678739	0.713383	0.734037	7.7434	7.20502	6.91134
2013	2013-09-02	245	20	1.61	1.77	1.36	0.678537	0.713373	0.734024	7.73004	7.21954	6.92566
2013	2013-09-02	245	21	1.53	1.84	1.33	0.678354	0.713362	0.734015	7.67759	7.2002	6.92988
2013	2013-09-02	245	22	1.52	1.89	1.02	0.678163	0.71335	0.733995	7.59067	7.15884	6.90662
2013	2013-09-02	245	23	1.53	1.79	0.93	0.677982	0.713336	0.733978	7.45795	7.08763	6.8405
2013	2013-09-03	246	0	1.38	1.86	0.94	0.677822	0.713321	0.733953	7.31328	7.00643	6.76059
2013	2013-09-03	246	1	1.36	1.73	0.87	0.677664	0.713299	0.733932	7.15106	6.92677	6.65652
2013	2013-09-03	246	2	1.37	1.76	0.83	0.677518	0.713284	0.733913	6.98472	6.82548	6.54198
2013	2013-09-03	246	3	1.41	1.67	0.92	0.677394	0.713272	0.73389	6.82667	6.72243	6.42451
2013	2013-09-03	246	4	1.34	1.63	0.76	0.677284	0.713257	0.733871	6.66608	6.62756	6.30188
2013	2013-09-03	246	5	1.34	1.63	0.86	0.677183	0.713243	0.733845	6.49566	6.50915	6.16314
2013	2013-09-03	246	6	1.32	1.52	1.03	0.677088	0.713231	0.733819	6.36755	6.40727	6.0524
2013	2013-09-03	246	7	1.32	1.51	0.96	0.677003	0.713219	0.733793	6.25672	6.3305	5.95235
2013	2013-09-03	246	8	1.31	1.8	0.97	0.676908	0.713208	0.733766	6.10878	6.22472	5.8237
2013	2013-09-03	246	9	1.32	1.64	0.98	0.676797	0.713198	0.733739	5.97221	6.11923	5.69714
2013	2013-09-03	246	10	1.46	1.62	1.12	0.676714	0.713191	0.73371	5.86285	6.02463	5.57788
2013	2013-09-03	246	11	1.53	1.67	1.42	0.676635	0.713187	0.733685	5.86487	5.98995	5.52515
2013	2013-09-03	246	12	1.63	1.59	1.48	0.676546	0.713185	0.733663	5.90876	5.97639	5.49343
2013	2013-09-03	246	13	1.73	1.65	1.67	0.676459	0.713184	0.733646	6.04748	6.02515	5.51458
2013	2013-09-03	246	14	1.67	1.65	1.72	0.676372	0.713182	0.733629	6.21026	6.0889	5.54793
2013	2013-09-03	246	15	1.69	1.63	1.59	0.67624	0.713177	0.733609	6.34515	6.14623	5.57868
2013	2013-09-03	246	16	1.77	1.78	1.7	0.675944	0.713172	0.733599	6.48292	6.20927	5.62176
2013	2013-09-03	246	17	1.75	1.69	1.76	0.675783	0.713163	0.733579	6.63796	6.29356	5.68802
2013	2013-09-03	246	18	1.74	1.66	1.84	0.675668	0.713151	0.73354	6.76392	6.3699	5.74806
2013	2013-09-03	246	19	1.52	1.82	1.75	0.675605	0.713167	0.733509	6.84032	6.42414	5.79244
2013	2013-09-03	246	20	1.38	1.7	2.09	0.675617	0.713296	0.733611	6.88197	6.46361	5.82983
2013	2013-09-03	246	21	0.95	1.65	1.87	0.675763	0.713939	0.734042	6.91127	6.49634	5.86712
2013	2013-09-03	246	22	0.42	1.49	1.98	0.676846	0.714565	0.735266	6.9331	6.52399	5.90537
2013	2013-09-03	246	23	0.38	1.35	1.86	0.685167	0.714888	0.736355	6.94934	6.5451	5.93563
2013	2013-09-04	247	0	0.4	1.41	1.74	0.701088	0.714864	0.736834	6.9623	6.5645	5.96254
2013	2013-09-04	247	1	0.4	1.44	1.84	0.705041	0.714837	0.737031	6.99502	6.59984	6.00772
2013	2013-09-04	247	2	0.47	1.62	2.03	0.706382	0.714892	0.737206	7.03765	6.63926	6.06012
2013	2013-09-04	247	3	0.33	1.36	1.93	0.707318	0.715013	0.737544	7.07704	6.68095	6.11134
2013	2013-09-04	247	4	0.24	1.44	1.88	0.711393	0.715192	0.737632	7.13993	6.72958	6.17201
2013	2013-09-04	247	5	0.38	1.58	2.18	0.711797	0.715158	0.737667	7.20477	6.79153	6.24064
2013	2013-09-04	247	6	0.16	1.25	2.26	0.714166	0.715656	0.73802	7.28045	6.87781	6.32677
2013	2013-09-04	247	7	0.23	1.34	1.9	0.718355	0.716467	0.737969	7.36657	7.0093	6.42776
2013	2013-09-04	247	8	0.53	1.54	2.02	0.719158	0.716529	0.737688	7.44766	7.14481	6.53175
2013	2013-09-04	247	9	0.13	1.52	1.89	0.725296	0.716738	0.737956	7.52589	7.25532	6.63
2013	2013-09-04	247	10	0.09	1.27	1.73	0.743894	0.717236	0.738185	7.62784	7.37453	6.7466
2013	2013-09-04	247	11	0.14	1.2	2.07	0.754912	0.717645	0.737995	7.7582	7.51411	6.88192
2013	2013-09-04	247	12	0.28	1.26	1.98	0.752328	0.717547	0.737974	7.89444	7.63401	7.01761
2013	2013-09-04	247	13	0.31	1.27	1.81	0.748558	0.71752	0.737947	8.04606	7.74047	7.15027
2013	2013-09-04	247	14	0.07	1.16	1.92	0.757585	0.718156	0.738204	8.19754	7.86267	7.28568
2013	2013-09-04	247	15	0.09	1.2	1.92	0.763173	0.719053	0.738295	8.36265	8.00975	7.45236
2013	2013-09-04	247	16	0.55	1.38	1.85	0.762565	0.719165	0.737949	8.53173	8.10038	7.64032
2013	2013-09-04	247	17	0.74	1.44	1.84	0.751873	0.718657	0.73747	8.66412	8.13077	7.78388
2013	2013-09-04	247	18	0.72	1.44	2.02	0.745235	0.718451	0.737375	8.77517	8.15828	7.90384
2013	2013-09-04	247	19	0.82	1.49	2.04	0.738371	0.718191	0.737161	8.85709	8.18579	8.00652
2013	2013-09-04	247	20	1	1.5	2.02	0.731711	0.717905	0.736927	8.91413	8.20549	8.0879
2013	2013-09-04	247	21	1.19	1.7	1.84	0.726294	0.717558	0.736796	8.95606	8.22063	8.16022
2013	2013-09-04	247	22	1.05	1.54	2.3	0.722521	0.717199	0.736665	8.99035	8.24259	8.22629
2013	2013-09-04	247	23	1.2	1.54	2.23	0.71881	0.716957	0.736509	9.01231	8.26222	8.28077
2013	2013-09-05	248	0	1.03	1.53	1.82	0.715222	0.716735	0.736433	9.03273	8.27867	8.32909
2013	2013-09-05	248	1	1.28	1.5	1.89	0.712325	0.716426	0.736487	9.05764	8.2967	8.37533
2013	2013-09-05	248	2	1.15	1.73	2.01	0.710233	0.715672	0.736466	9.09109	8.32367	8.42274
2013	2013-09-05	248	3	0.63	1.6	2.07	0.708952	0.715527	0.736677	9.13336	8.36282	8.47722
2013	2013-09-05	248	4	0.59	1.65	2.03	0.713012	0.71564	0.737264	9.16642	8.39492	8.52495
2013	2013-09-05	248	5	1.08	1.63	2.02	0.710604	0.715496	0.737112	9.20066	8.43061	8.58339
2013	2013-09-05	248	6	1.1	1.83	2.06	0.709985	0.715387	0.737118	9.23648	8.46491	8.63999
2013	2013-09-05	248	7	1.17	1.71	2.16	0.708841	0.715285	0.736984	9.26774	8.49315	8.69275
2013	2013-09-05	248	8	1.38	1.76	2	0.707488	0.715191	0.736834	9.29125	8.51691	8.73648
2013	2013-09-05	248	9	1.43	1.78	2.12	0.706062	0.715114	0.736729	9.313	8.53594	8.77542
2013	2013-09-05	248	10	0.65	1.73	1.81	0.706906	0.715233	0.737133	9.35339	8.56359	8.81595
2013	2013-09-05	248	11	1.35	1.66	2.16	0.707596	0.715244	0.73717	9.39695	8.58968	8.85697
2013	2013-09-05	248	12	1.34	1.95	2.28	0.70614	0.715165	0.736954	9.48541	8.63797	8.9218
2013	2013-09-05	248	13	1.4	1.75	2.5	0.705241	0.715092	0.736853	9.55898	8.67299	8.97049
2013	2013-09-05	248	14	1.36	1.95	2.47	0.704653	0.715029	0.736802	9.64042	8.71201	9.02378
2013	2013-09-05	248	15	1.43	1.92	2.46	0.704685	0.715006	0.73683	9.69195	8.73513	9.05492
2013	2013-09-05	248	16	1.21	1.78	2.19	0.704642	0.714994	0.736855	9.7369	8.76107	9.08793
2013	2013-09-05	248	17	0.86	1.9	2.32	0.706986	0.715166	0.737242	9.75701	8.77123	9.10196
2013	2013-09-05	248	18	0.93	2.21	2.17	0.708136	0.715234	0.737289	9.76317	8.78125	9.11541
2013	2013-09-05	248	19	1.36	1.98	2.1	0.706718	0.715168	0.737084	9.74183	8.77437	9.11521
2013	2013-09-05	248	20	1.18	1.86	3.05	0.70552	0.715137	0.736998	9.70785	8.76012	9.10786
2013	2013-09-05	248	21	1.42	2.11	2.74	0.704882	0.715139	0.736979	9.66958	8.74148	9.09483
2013	2013-09-05	248	22	1.36	1.95	2.26	0.704422	0.715151	0.737003	9.62479	8.71758	9.07767
2013	2013-09-05	248	23	1.31	1.79	2.29	0.704022	0.715113	0.73695	9.56957	8.67876	9.05021
2013	2013-09-06	249	0	1.46	1.73	2.43	0.703363	0.71505	0.736829	9.55722	8.67029	9.05124
2013	2013-09-06	249	1	1.55	1.82	2.43	0.702408	0.714969	0.736714	9.55012	8.66627	9.05586
2013	2013-09-06	249	2	1.64	1.81	2.44	0.700967	0.714905	0.736591	9.55093	8.66919	9.06671
2013	2013-09-06	249	3	1.64	2.07	2.39	0.699693	0.714841	0.736509	9.55081	8.6743	9.07765
2013	2013-09-06	249	4	0.95	1.84	2.17	0.699191	0.714854	0.73663	9.56448	8.68793	9.09756
2013	2013-09-06	249	5	1.22	1.77	1.98	0.700153	0.714937	0.736912	9.5817	8.70544	9.1215
2013	2013-09-06	249	6	1.04	1.73	2.09	0.700708	0.714983	0.737029	9.59833	8.72618	9.14804
2013	2013-09-06	249	7	0.81	1.74	2.23	0.70205	0.715153	0.737266	9.60145	8.74411	9.16749
2013	2013-09-06	249	8	0.54	1.65	2.34	0.705411	0.715376	0.737539	9.59037	8.75847	9.18092
2013	2013-09-06	249	9	0.44	1.64	2.37	0.710668	0.715488	0.737563	9.58256	8.77907	9.19993
2013	2013-09-06	249	10	0.44	1.82	2.2	0.713498	0.715617	0.737622	9.57128	8.78731	9.21081
2013	2013-09-06	249	11	0.46	1.7	2.31	0.714219	0.715675	0.737542	9.57115	8.7975	9.22397
2013	2013-09-06	249	12	0.84	2.03	2.24	0.712676	0.715635	0.73736	9.59448	8.80312	9.24275
2013	2013-09-06	249	13	0.86	1.63	2.37	0.710134	0.7157	0.737444	9.6458	8.82324	9.26646
2013	2013-09-06	249	14	0.38	1.76	2.43	0.716829	0.716111	0.737823	9.70384	8.86207	9.30019
2013	2013-09-06	249	15	0.89	1.74	2.19	0.71528	0.71602	0.737404	9.76325	8.89514	9.34205
2013	2013-09-06	249	16	1.22	1.86	1.9	0.711522	0.715869	0.73709	9.84941	8.93241	9.39458
2013	2013-09-06	249	17	1.52	1.99	2.19	0.70812	0.715726	0.736882	9.94863	8.97822	9.45524
2013	2013-09-06	249	18	1.5	1.92	2.22	0.810597	0.715591	0.73672	10.0303	9.02008	9.51142
2013	2013-09-06	249	19	1.61	1.96	2.11	0.818206	0.71546	0.736578	10.0877	9.05755	9.5601
2013	2013-09-06	249	20	1.52	1.97	2.22	0.816329	0.715242	0.73645	10.1162	9.08248	9.59522
2013	2013-09-06	249	21	1.44	1.95	2.43	0.815	0.715127	0.736383	10.1282	9.10044	9.62132
2013	2013-09-06	249	22	1.38	2.19	2.7	0.813938	0.715046	0.736377	10.1328	9.11343	9.64276
2013	2013-09-06	249	23	0.62	1.79	3.14	0.813137	0.715004	0.736466	10.1324	9.1236	9.66001
2013	2013-09-07	250	0	1.3	1.86	2.83	0.813151	0.714996	0.736673	10.1275	9.13048	9.67325
2013	2013-09-07	250	1	1.61	2.05	2.57	0.812215	0.714938	0.736676	10.1215	9.13751	9.68592
2013	2013-09-07	250	2	1.49	2.13	2.07	0.81038	0.714879	0.736589	10.1136	9.14401	9.69738
2013	2013-09-07	250	3	1.64	2.37	2.58	0.808606	0.714802	0.736484	10.0956	9.1458	9.70258
2013	2013-09-07	250	4	1.52	1.93	2.44	0.80707	0.71473	0.736381	10.0697	9.14288	9.70039
2013	2013-09-07	250	5	1.63	2.17	2.44	0.805766	0.714653	0.736267	10.0364	9.1357	9.69186
2013	2013-09-07	250	6	1.8	2.02	2.81	0.739076	0.7146	0.736158	9.99681	9.12314	9.67861
2013	2013-09-07	250	7	1.79	2.17	2.5	0.695491	0.714543	0.736049	9.97181	9.11265	9.66787
2013	2013-09-07	250	8	1.72	2.21	2.47	0.694426	0.71448	0.735961	9.92934	9.09806	9.64443
2013	2013-09-07	250	9	1.75	2.04	2.69	0.693289	0.714437	0.735881	9.88517	9.07653	9.61667
2013	2013-09-07	250	10	1.87	2.09	2.4	0.692524	0.714398	0.735822	9.87929	9.06755	9.60236
2013	2013-09-07	250	11	1.91	2.01	2.33	0.691739	0.714381	0.735834	9.94367	9.09837	9.6172
2013	2013-09-07	250	12	2	2.21	2.42	0.739594	0.714379	0.735861	9.99761	9.10658	9.61131
2013	2013-09-07	250	13	2.06	2.19	1.98	0.793018	0.714384	0.735858	10.1422	9.17649	9.66146
2013	2013-09-07	250	14	2.17	2.35	2.2	0.790783	0.714375	0.735825	10.2598	9.22743	9.69371
2013	2013-09-07	250	15	1.94	2.06	2.04	0.788523	0.714363	0.735815	10.3812	9.28507	9.73703
2013	2013-09-07	250	16	1.57	2.26	2.02	0.786265	0.714418	0.736029	10.4572	9.32844	9.76139
2013	2013-09-07	250	17	1.72	2.17	2.68	0.786183	0.714493	0.73621	10.5145	9.36271	9.78945
2013	2013-09-07	250	18	2.02	2.16	2.48	0.785721	0.714474	0.736229	10.5665	9.40428	9.82437
2013	2013-09-07	250	19	1.86	2.26	2.42	0.785128	0.714445	0.736177	10.5821	9.43473	9.84662
2013	2013-09-07	250	20	1.92	2.14	2.24	0.78486	0.714415	0.736114	10.5531	9.4449	9.85027
2013	2013-09-07	250	21	1.88	2.2	2.29	0.784587	0.714385	0.73603	10.5084	9.44741	9.84949
2013	2013-09-07	250	22	2	2.54	2.26	0.784417	0.714357	0.735961	10.4528	9.44056	9.84117
2013	2013-09-07	250	23	1.93	2.51	2.04	0.783957	0.714331	0.735906	10.3852	9.42294	9.82022
2013	2013-09-08	251	0	1.89	2.11	1.99	0.783938	0.714305	0.735834	10.3116	9.39558	9.79017
2013	2013-09-08	251	1	1.87	2.25	2.38	0.783921	0.714285	0.735747	10.2465	9.37355	9.76572
2013	2013-09-08	251	2	1.93	2.1	2.73	0.783991	0.71426	0.735694	10.1837	9.34825	9.73849
2013	2013-09-08	251	3	1.82	2.25	2.13	0.784132	0.714333	0.735778	10.1309	9.32855	9.71413
2013	2013-09-08	251	4	1.48	2.09	2.81	0.784753	0.714639	0.736143	10.0765	9.30445	9.68628
2013	2013-09-08	251	5	1.45	2.28	2.19	0.786375	0.714796	0.736617	10.0266	9.27652	9.65729
2013	2013-09-08	251	6	1.66	2.67	1.82	0.788125	0.714751	0.736624	10.0316	9.2862	9.6655
2013	2013-09-08	251	7	1.82	2.42	1.94	0.788558	0.714688	0.736537	10.0562	9.30889	9.69006
2013	2013-09-08	251	8	1.91	2.29	2.3	0.788302	0.714649	0.736423	10.0797	9.3343	9.71786
2013	2013-09-08	251	9	1.92	2.28	2.22	0.787991	0.714605	0.73637	10.102	9.36051	9.74575
2013	2013-09-08	251	10	2.04	2.5	2	0.787432	0.714573	0.736287	10.1383	9.39391	9.77673
2013	2013-09-08	251	11	2.16	2.52	2.37	0.78613	0.714542	0.736199	10.2174	9.44313	9.8292
2013	2013-09-08	251	12	2.22	2.58	2.04	0.784392	0.71451	0.736101	10.3219	9.50631	9.89201
2013	2013-09-08	251	13	2.29	2.69	2.17	0.782628	0.714482	0.736017	10.4265	9.56982	9.9536
2013	2013-09-08	251	14	2.2	2.56	2.1	0.780735	0.71446	0.742558	10.5432	9.63735	10.0213
2013	2013-09-08	251	15	2.24	2.43	2.31	0.778913	0.714429	0.743553	10.6554	9.70801	10.0904
2013	2013-09-08	251	16	2.21	2.57	2.29	0.77736	0.714404	0.743426	10.739	9.76766	10.1495
2013	2013-09-08	251	17	2.3	2.46	2.22	0.776105	0.714384	0.743275	10.798	9.81776	10.1999
2013	2013-09-08	251	18	1.43	2.43	2.46	0.775534	0.714472	0.743445	10.8238	9.85008	10.2317
2013	2013-09-08	251	19	1.28	2.2	2.47	0.778834	0.714886	0.744253	10.846	9.88501	10.2667
2013	2013-09-08	251	20	0.79	2.26	2.19	0.787755	0.71516	0.744754	10.8654	9.92459	10.3079
2013	2013-09-08	251	21	1.29	2.27	3.05	0.792599	0.715138	0.744749	10.8681	9.95583	10.3462
2013	2013-09-08	251	22	1.31	2.43	3.12	0.792516	0.715332	0.744842	10.8569	9.98063	10.3756
2013	2013-09-08	251	23	0.55	1.94	2.98	0.798801	0.735317	0.745494	10.8464	10.0133	10.4085
2013	2013-09-09	252	0	1.38	1.94	2.9	0.820143	0.739418	0.746283	10.8401	10.0815	10.4623
2013	2013-09-09	252	1	0.08	1.53	2.54	0.882218	0.742343	0.746765	10.7967	10.1972	10.5542
2013	2013-09-09	252	2	0.68	2.02	2.2	0.883231	0.742491	0.745424	10.7771	10.1452	10.6093
2013	2013-09-09	252	3	0.79	1.97	2.04	0.863571	0.737836	0.744763	10.804	10.0248	10.6566
2013	2013-09-09	252	4	0.98	2.23	2.05	0.849921	0.717579	0.744361	10.8327	9.96232	10.6961
2013	2013-09-09	252	5	1.12	2.21	2.15	0.841806	0.717418	0.744065	10.8441	9.9245	10.7211
2013	2013-09-09	252	6	1.31	2.35	2.14	0.835587	0.717263	0.743778	10.8644	9.91188	10.7557
2013	2013-09-09	252	7	1.38	2.41	1.71	0.829943	0.717077	0.743501	10.8964	9.91828	10.7933
2013	2013-09-09	252	8	1.43	2.31	2.02	0.824255	0.716905	0.743256	10.9091	9.92083	10.8157
2013	2013-09-09	252	9	0.79	2.07	1.9	0.820987	0.716786	0.743282	10.9149	9.91471	10.8239
2013	2013-09-09	252	10	1.06	2.08	2.02	0.824278	0.716783	0.744131	10.9281	9.922	10.8364
2013	2013-09-09	252	11	0.69	2.03	1.9	0.827467	0.71682	0.744768	10.9577	9.94766	10.8629
2013	2013-09-09	252	12	0.82	1.93	2.08	0.827179	0.716821	0.744893	10.9798	9.96114	10.882
2013	2013-09-09	252	13	0.91	1.98	1.69	0.828012	0.716859	0.745026	11.0012	9.97342	10.8967
2013	2013-09-09	252	14	1.18	2.1	1.96	0.826077	0.718255	0.744803	11.0323	9.98852	10.9178
2013	2013-09-09	252	15	1.5	1.9	2.07	0.82065	0.71789	0.744392	11.0484	9.99123	10.919
2013	2013-09-09	252	16	1.49	2.09	2.13	0.814869	0.733626	0.744115	11.1023	10.0103	10.9384
2013	2013-09-09	252	17	1.69	2.16	1.88	0.810652	0.739375	0.74388	11.1747	10.0421	10.9576
2013	2013-09-09	252	18	1.34	2	1.99	0.809076	0.739193	0.743985	11.2178	10.0645	10.9633
2013	2013-09-09	252	19	1.64	1.96	2.18	0.80838	0.739031	0.744033	11.237	10.0845	10.9708
2013	2013-09-09	252	20	1.98	2.12	2.06	0.807291	0.738785	0.743953	11.2321	10.0953	10.9711
2013	2013-09-09	252	21	0.99	1.99	1.98	0.809639	0.738777	0.74433	11.2238	10.1054	10.9709
2013	2013-09-09	252	22	1.44	2.06	1.76	0.809261	0.738652	0.744329	11.2072	10.1157	10.9705
2013	2013-09-09	252	23	1.73	2.05	1.94	0.807111	0.738462	0.74407	11.1899	10.1242	10.9732
2013	2013-09-10	253	0	1.5	2.22	1.8	0.804927	0.738304	0.743865	11.1626	10.124	10.9693
2013	2013-09-10	253	1	1.64	2.22	1.56	0.803905	0.738235	0.743671	11.0837	10.0984	10.9183
2013	2013-09-10	253	2	1.6	2.18	1.91	0.803335	0.738211	0.743537	10.9742	10.0345	10.8419
2013	2013-09-10	253	3	1.78	2.09	1.9	0.803103	0.718163	0.74345	10.8546	9.97891	10.756
2013	2013-09-10	253	4	1.72	1.99	1.88	0.801995	0.715121	0.743386	10.7322	9.91488	10.6648
2013	2013-09-10	253	5	1.64	2.13	1.95	0.80136	0.715058	0.743287	10.6252	9.86	10.588
2013	2013-09-10	253	6	1.42	2.11	1.81	0.80096	0.714988	0.743263	10.5091	9.79122	10.4949
2013	2013-09-10	253	7	1.41	2.04	1.69	0.800428	0.714918	0.743229	10.3908	9.71899	10.398
2013	2013-09-10	253	8	1.73	1.96	1.79	0.800321	0.714857	0.743189	10.278	9.64631	10.3034
2013	2013-09-10	253	9	1.71	2.28	1.73	0.800088	0.714802	0.743164	10.1736	9.57738	10.2094
2013	2013-09-10	253	10	1.76	2.13	2.35	0.799654	0.714736	0.743153	10.0914	9.51183	10.1193
2013	2013-09-10	253	11	1.62	2.09	1.98	0.799138	0.714679	0.743161	10.041	9.46193	10.0401
2013	2013-09-10	253	12	2.03	2.13	1.74	0.743132	0.714631	0.736535	9.98802	9.38643	9.94977
2013	2013-09-10	253	13	1.86	2.16	2.11	0.796111	0.714592	0.735439	10.0785	9.43818	9.95177
2013	2013-09-10	253	14	2.11	2.09	2.2	0.794241	0.71455	0.735407	10.1224	9.43701	9.91946
2013	2013-09-10	253	15	2.02	2.15	2.34	0.79186	0.714493	0.735369	10.2157	9.44913	9.90111
2013	2013-09-10	253	16	2.02	2.4	2.38	0.789419	0.714448	0.735326	10.3229	9.4673	9.88122
2013	2013-09-10	253	17	2.09	2.22	1.91	0.787037	0.714409	0.735283	10.4295	9.51771	9.91223
2013	2013-09-10	253	18	1.85	2.2	1.79	0.78481	0.714377	0.735224	10.4389	9.51194	9.88477
2013	2013-09-10	253	19	1.88	2.04	1.89	0.784104	0.714342	0.735165	10.413	9.49883	9.87061
2013	2013-09-10	253	20	1.78	2.37	1.61	0.784494	0.714316	0.735116	10.3015	9.43725	9.80108
2013	2013-09-10	253	21	1.7	2.03	1.62	0.784835	0.714284	0.735058	10.1554	9.35861	9.70571
2013	2013-09-10	253	22	1.99	1.89	1.43	0.763445	0.714264	0.735058	10.0377	9.30059	9.62968
2013	2013-09-10	253	23	1.72	2.05	1.38	0.685286	0.714272	0.735076	9.89235	9.21325	9.5302
2013	2013-09-11	254	0	1.44	1.97	1.26	0.685168	0.71427	0.73507	9.75599	9.12865	9.43091
2013	2013-09-11	254	1	1.68	2.05	1.45	0.68498	0.714259	0.73505	9.58024	9.02504	9.30157
2013	2013-09-11	254	2	1.67	1.83	1.3	0.684745	0.714244	0.735021	9.4246	8.93114	9.17685
2013	2013-09-11	254	3	1.4	2.05	1.32	0.684525	0.714222	0.734992	9.28212	8.84273	9.05829
2013	2013-09-11	254	4	1.54	1.89	1.2	0.684269	0.714204	0.734957	9.13682	8.74134	8.9391
2013	2013-09-11	254	5	1.56	1.96	1.22	0.683991	0.714185	0.734919	8.97702	8.64777	8.80961
2013	2013-09-11	254	6	1.5	1.95	0.93	0.683691	0.714167	0.734891	8.80058	8.52589	8.67328
2013	2013-09-11	254	7	1.49	1.93	1.04	0.683412	0.714165	0.734857	8.60585	8.40641	8.5082
2013	2013-09-11	254	8	1.59	1.91	0.93	0.683159	0.71416	0.734809	8.38462	8.26789	8.31716
2013	2013-09-11	254	9	1.45	1.97	1.13	0.682861	0.714137	0.734766	8.14503	8.09474	8.09861
2013	2013-09-11	254	10	1.5	1.96	1.32	0.682595	0.71412	0.73473	7.93674	7.91846	7.89732
2013	2013-09-11	254	11	1.62	1.91	1.85	0.682349	0.714109	0.734695	7.82305	7.79361	7.72954
2013	2013-09-11	254	12	1.75	1.87	2.05	0.682098	0.714094	0.73467	7.86996	7.77086	7.68986
2013	2013-09-11	254	13	1.72	2.06	1.89	0.681829	0.71407	0.734652	8.03287	7.85737	7.72569
2013	2013-09-11	254	14	1.82	2.26	2.41	0.681546	0.714055	0.734641	8.11273	7.84951	7.69826
2013	2013-09-11	254	15	1.87	2.16	2.34	0.681234	0.714031	0.734636	8.31393	7.91685	7.72487
2013	2013-09-11	254	16	1.77	1.98	2.31	0.680909	0.713832	0.734628	8.58402	8.03395	7.81621
2013	2013-09-11	254	17	1.76	2.1	2.5	0.680567	0.713482	0.734602	8.69006	8.06904	7.83392
2013	2013-09-11	254	18	1.69	1.97	2.12	0.680264	0.713463	0.734582	8.74596	8.12002	7.87463
2013	2013-09-11	254	19	1.65	1.89	1.76	0.679975	0.713448	0.734548	8.76224	8.15659	7.90223
2013	2013-09-11	254	20	1.66	1.96	1.54	0.679692	0.713437	0.734526	8.70661	8.15568	7.89822
2013	2013-09-11	254	21	1.57	1.95	1.31	0.679456	0.713422	0.734496	8.59471	8.12019	7.86426
2013	2013-09-11	254	22	1.53	1.98	1.33	0.679256	0.713407	0.734455	8.44373	8.04121	7.78685
2013	2013-09-11	254	23	1.54	1.91	1.31	0.679072	0.713393	0.734425	8.31228	7.97804	7.71754
2013	2013-09-12	255	0	1.51	1.85	1.27	0.678919	0.713378	0.734386	8.18026	7.90177	7.63463
2013	2013-09-12	255	1	1.52	1.9	1.34	0.678788	0.713365	0.734352	8.08474	7.83892	7.56924
2013	2013-09-12	255	2	1.53	1.86	1.32	0.678647	0.713353	0.734322	7.98771	7.78767	7.50893
2013	2013-09-12	255	3	1.5	2.01	1.11	0.678496	0.71334	0.734296	7.86156	7.71175	7.43228
2013	2013-09-12	255	4	1.44	1.87	1.02	0.678331	0.713326	0.734268	7.70798	7.62331	7.3249
2013	2013-09-12	255	5	1.4	1.77	1.04	0.678195	0.713312	0.734225	7.53458	7.51504	7.20068
2013	2013-09-12	255	6	1.46	1.75	1.05	0.678012	0.713297	0.734188	7.35218	7.39228	7.06019
2013	2013-09-12	255	7	1.37	1.84	1.01	0.677875	0.713277	0.734158	7.21195	7.29834	6.94272
2013	2013-09-12	255	8	1.34	1.67	1.04	0.677756	0.713263	0.73413	7.04692	7.18323	6.80415
2013	2013-09-12	255	9	1.37	1.65	1.16	0.677636	0.713251	0.734102	6.86702	7.0462	6.64577
2013	2013-09-12	255	10	1.4	1.9	1.41	0.677537	0.713242	0.734081	6.66312	6.86896	6.46511
2013	2013-09-12	255	11	1.49	2.17	1.9	0.677409	0.713235	0.734046	6.52503	6.71692	6.29883
2013	2013-09-12	255	12	1.61	1.92	1.86	0.67719	0.713224	0.73402	6.60049	6.70873	6.24631
2013	2013-09-12	255	13	1.54	2.11	2.29	0.676826	0.71321	0.734011	6.99688	6.98005	6.497
2013	2013-09-12	255	14	1.66	2.15	2.33	0.676676	0.713203	0.734008	7.02854	6.94166	6.44934
2013	2013-09-12	255	15	1.7	1.91	2.32	0.676603	0.713194	0.734001	7.24147	7.03489	6.51462
2013	2013-09-12	255	16	1.76	2	2.58	0.676473	0.713189	0.733999	7.42442	7.07485	6.53883
2013	2013-09-12	255	17	1.53	2.08	1.74	0.676438	0.713186	0.733956	7.69344	7.21617	6.67163
2013	2013-09-12	255	18	1.6	2.11	2.02	0.67649	0.713192	0.73399	7.81219	7.28938	6.73455
2013	2013-09-12	255	19	1.42	1.78	1.99	0.676589	0.713204	0.734	7.84542	7.31697	6.76601
2013	2013-09-12	255	20	1.56	1.9	1.52	0.676672	0.713212	0.734001	7.84528	7.3484	6.7928
2013	2013-09-12	255	21	1.54	2.05	1.24	0.676718	0.713218	0.734002	7.7959	7.34614	6.80029
2013	2013-09-12	255	22	1.62	2.13	1.25	0.676734	0.713218	0.734	7.70961	7.32075	6.78847
2013	2013-09-12	255	23	1.41	1.71	1.04	0.676715	0.713215	0.733982	7.57794	7.26495	6.73823
2013	2013-09-13	256	0	1.38	1.82	1.03	0.676689	0.713209	0.733949	7.42252	7.18885	6.66094
2013	2013-09-13	256	1	1.38	1.63	1.01	0.676651	0.713204	0.73392	7.26687	7.10602	6.57539
2013	2013-09-13	256	2	1.47	1.72	0.93	0.676623	0.713196	0.733887	7.10977	7.01853	6.4802
2013	2013-09-13	256	3	1.36	1.81	0.93	0.676572	0.713187	0.733866	6.94229	6.91549	6.37607
2013	2013-09-13	256	4	1.4	1.6	0.85	0.676515	0.713179	0.733858	6.77709	6.81339	6.26344
2013	2013-09-13	256	5	1.39	1.62	0.89	0.676446	0.713171	0.733846	6.61748	6.70918	6.14595
2013	2013-09-13	256	6	1.28	1.55	0.9	0.67638	0.713163	0.733829	6.47134	6.61109	6.03384
2013	2013-09-13	256	7	1.33	1.68	0.94	0.67631	0.713157	0.733806	6.32492	6.51557	5.91727
2013	2013-09-13	256	8	1.32	1.62	0.99	0.676255	0.713153	0.733783	6.16674	6.40831	5.78662
2013	2013-09-13	256	9	1.23	1.51	1.06	0.676184	0.713142	0.733729	6.01475	6.29724	5.65544
2013	2013-09-13	256	10	1.34	1.53	1.17	0.676134	0.713131	0.733681	5.8166	6.13467	5.49
2013	2013-09-13	256	11	1.36	1.62	1.5	0.676115	0.713129	0.733663	5.65652	5.96446	5.31411
2013	2013-09-13	256	12	1.48	1.64	1.87	0.676067	0.713127	0.733655	5.69007	5.91639	5.22431
2013	2013-09-13	256	13	1.55	1.92	1.91	0.676004	0.71312	0.73364	6.0872	6.1722	5.46248
2013	2013-09-13	256	14	1.65	1.91	2.22	0.675884	0.713113	0.733639	6.31083	6.25026	5.54489
2013	2013-09-13	256	15	1.66	1.87	1.95	0.675751	0.713104	0.733626	6.56552	6.35721	5.62779
2013	2013-09-13	256	16	1.59	2.16	1.81	0.675612	0.713098	0.733618	6.76921	6.44875	5.70428
2013	2013-09-13	256	17	1.46	1.93	1.9	0.675441	0.713086	0.733601	6.92914	6.54141	5.78767
2013	2013-09-13	256	18	1.55	2.01	2.24	0.675266	0.713076	0.733585	7.06829	6.65071	5.89258
2013	2013-09-13	256	19	1.38	1.99	2.02	0.675091	0.713068	0.73359	7.14551	6.74467	5.98437
2013	2013-09-13	256	20	1.33	1.9	1.59	0.674961	0.713061	0.733583	7.15277	6.79477	6.04818
2013	2013-09-13	256	21	1.6	1.73	1.59	0.674859	0.713054	0.733553	7.09708	6.80092	6.0629
2013	2013-09-13	256	22	1.33	1.7	1.47	0.674745	0.713045	0.733532	7.00569	6.78004	6.0571
2013	2013-09-13	256	23	1.3	1.72	1.25	0.674657	0.713038	0.733513	6.88964	6.72975	6.02803
2013	2013-09-14	257	0	1.35	1.93	1.34	0.674575	0.713032	0.733497	6.7888	6.69136	6.00141
2013	2013-09-14	257	1	1.25	1.79	1.18	0.6745	0.713024	0.733483	6.69848	6.65738	5.97961
2013	2013-09-14	257	2	1.4	1.65	1.25	0.674421	0.713016	0.733467	6.59054	6.60574	5.93945
2013	2013-09-14	257	3	1.25	1.65	1.24	0.674362	0.713007	0.733454	6.48887	6.55382	5.89917
2013	2013-09-14	257	4	1.37	1.67	1.29	0.674301	0.713	0.733441	6.38556	6.49844	5.85354
2013	2013-09-14	257	5	1.31	1.71	1.3	0.67424	0.712993	0.733426	6.29103	6.44772	5.8105
2013	2013-09-14	257	6	1.2	1.85	1.44	0.674171	0.712986	0.733408	6.20702	6.40236	5.77181
2013	2013-09-14	257	7	1.25	1.67	1.33	0.674101	0.712968	0.733399	6.13631	6.36794	5.74354
2013	2013-09-14	257	8	1.2	1.82	1.31	0.674056	0.712954	0.733386	6.05424	6.32055	5.7041
2013	2013-09-14	257	9	1.22	1.79	1.37	0.673996	0.712949	0.733368	5.9544	6.25533	5.64418
2013	2013-09-14	257	10	1.21	1.82	1.34	0.673931	0.712943	0.733348	5.82153	6.14138	5.5539
2013	2013-09-14	257	11	1.31	2.07	1.45	0.673848	0.712933	0.733327	5.7543	6.05185	5.47162
2013	2013-09-14	257	12	1.53	2.17	1.71	0.673681	0.712921	0.733313	5.82625	6.01488	5.4248
2013	2013-09-14	257	13	1.36	2.31	1.6	0.673505	0.712907	0.733292	6.24419	6.34832	5.72867
2013	2013-09-14	257	14	1.53	2.37	2.01	0.673349	0.71289	0.733273	6.46814	6.44998	5.84646
2013	2013-09-14	257	15	1.54	2.29	1.86	0.673202	0.712871	0.73326	6.75707	6.57988	5.97103
2013	2013-09-14	257	16	1.65	2.28	1.71	0.673021	0.712856	0.733256	7.03815	6.71702	6.10588
2013	2013-09-14	257	17	1.68	2.44	2.06	0.672859	0.712827	0.733234	7.25736	6.86014	6.26108
2013	2013-09-14	257	18	1.57	2.05	1.91	0.672705	0.712811	0.733208	7.40499	6.98249	6.39415
2013	2013-09-14	257	19	1.64	2.34	1.97	0.672569	0.712801	0.733199	7.50685	7.10225	6.50842
2013	2013-09-14	257	20	1.43	1.93	1.53	0.672456	0.712791	0.733187	7.52728	7.1723	6.5876
2013	2013-09-14	257	21	1.26	1.93	1.25	0.672344	0.712779	0.733168	7.45951	7.16084	6.59952
2013	2013-09-14	257	22	1.36	2.04	1.25	0.672243	0.712768	0.733137	7.36833	7.13972	6.58688
2013	2013-09-14	257	23	1.31	2.19	1.11	0.672168	0.712757	0.733094	7.27202	7.11003	6.56507
2013	2013-09-15	258	0	1.27	2.07	1.21	0.6721	0.712748	0.733076	7.17423	7.07614	6.53898
2013	2013-09-15	258	1	1.28	1.89	1.05	0.672036	0.712739	0.733058	7.06856	7.03134	6.50413
2013	2013-09-15	258	2	1.3	1.95	1.11	0.671971	0.712722	0.733043	6.94524	6.96387	6.44832
2013	2013-09-15	258	3	1.32	1.92	0.99	0.671947	0.712714	0.73303	6.84979	6.90562	6.3991
2013	2013-09-15	258	4	1.41	1.91	1.05	0.671918	0.712708	0.733019	6.77694	6.86062	6.36042
2013	2013-09-15	258	5	1.26	2	1.2	0.671877	0.712701	0.733009	6.71459	6.82706	6.33065
2013	2013-09-15	258	6	1.24	1.89	0.96	0.671836	0.712693	0.733	6.61072	6.76238	6.27058
2013	2013-09-15	258	7	1.26	2.01	0.98	0.671796	0.712685	0.732987	6.50044	6.68587	6.19752
2013	2013-09-15	258	8	1.24	2.12	1.29	0.671788	0.71268	0.732973	6.41944	6.62457	6.13741
2013	2013-09-15	258	9	1.45	1.89	1.41	0.671774	0.712672	0.732957	6.33715	6.54916	6.06495
2013	2013-09-15	258	10	1.38	1.81	1.51	0.671732	0.712667	0.732934	6.28279	6.46894	6.00067
2013	2013-09-15	258	11	1.42	2.17	1.42	0.671668	0.712659	0.732915	6.3374	6.46807	5.98858
2013	2013-09-15	258	12	1.55	2.25	1.67	0.671565	0.71265	0.732893	6.45122	6.485	5.99597
2013	2013-09-15	258	13	1.6	2.34	1.49	0.671434	0.712632	0.732864	6.67098	6.58368	6.07195
2013	2013-09-15	258	14	1.72	2.54	1.6	0.671299	0.712614	0.732846	6.97401	6.73411	6.21184
2013	2013-09-15	258	15	1.7	2.5	1.66	0.67115	0.7126	0.73282	7.27283	6.8725	6.33052
2013	2013-09-15	258	16	1.7	2.51	1.98	0.670984	0.712585	0.732798	7.5905	7.0221	6.46573
2013	2013-09-15	258	17	1.94	2.34	2.06	0.670826	0.712564	0.732773	7.81933	7.14529	6.5818
2013	2013-09-15	258	18	1.85	2.85	3.39	0.670678	0.712544	0.732756	7.97177	7.25725	6.69351
2013	2013-09-15	258	19	1.63	2.4	2.35	0.670567	0.712518	0.732747	8.09919	7.38897	6.80777
2013	2013-09-15	258	20	1.56	2.22	1.97	0.670457	0.712502	0.732732	8.11808	7.45749	6.87962
2013	2013-09-15	258	21	1.45	2.07	1.77	0.670367	0.712491	0.732716	8.04555	7.45567	6.89486
2013	2013-09-15	258	22	1.48	2.05	1.33	0.670289	0.71248	0.732703	7.93429	7.42928	6.86819
2013	2013-09-15	258	23	1.41	1.88	1.19	0.67021	0.712469	0.732691	7.80431	7.38381	6.83476
2013	2013-09-16	259	0	1.36	2.02	1.06	0.670145	0.712457	0.732676	7.64852	7.31091	6.76757
2013	2013-09-16	259	1	1.34	1.87	1.02	0.670098	0.712444	0.732665	7.48327	7.22843	6.68726
2013	2013-09-16	259	2	1.32	1.99	1.14	0.670064	0.712433	0.732654	7.31188	7.13231	6.59353
2013	2013-09-16	259	3	1.24	1.85	1.1	0.670035	0.71242	0.732641	7.13485	7.02963	6.48383
2013	2013-09-16	259	4	1.16	1.97	1.16	0.670014	0.712404	0.732628	6.95724	6.92205	6.36484
2013	2013-09-16	259	5	1.15	2.01	1	0.669995	0.71239	0.732615	6.77397	6.80562	6.23647
2013	2013-09-16	259	6	1.19	1.9	0.91	0.669991	0.712376	0.732601	6.58757	6.68297	6.09693
2013	2013-09-16	259	7	1.13	1.65	0.93	0.669976	0.712363	0.732586	6.40955	6.56378	5.95799
2013	2013-09-16	259	8	1.19	1.67	1	0.66997	0.71235	0.732567	6.2096	6.42367	5.79186
2013	2013-09-16	259	9	1.19	1.79	1.1	0.669961	0.712342	0.732546	6.01026	6.26793	5.62031
2013	2013-09-16	259	10	1.28	1.74	1.71	0.669952	0.712335	0.732516	5.75442	6.0336	5.39704
2013	2013-09-16	259	11	1.32	1.78	1.58	0.669947	0.712327	0.732487	5.64304	5.89042	5.24135
2013	2013-09-16	259	12	1.44	2.14	1.79	0.669904	0.712313	0.732474	5.75898	5.901	5.19961
2013	2013-09-16	259	13	1.69	2.26	1.68	0.669829	0.712297	0.732437	6.13877	6.16722	5.44381
2013	2013-09-16	259	14	1.65	2	2.03	0.669704	0.712279	0.732411	6.35108	6.25274	5.52859
2013	2013-09-16	259	15	1.57	2.48	2.11	0.669544	0.712264	0.732375	6.6508	6.37717	5.64795
2013	2013-09-16	259	16	1.8	2.23	2.18	0.669409	0.71225	0.73235	6.92401	6.50548	5.76664
2013	2013-09-16	259	17	1.63	2.34	2.06	0.6693	0.712231	0.732332	7.16222	6.6556	5.92002
2013	2013-09-16	259	18	1.57	2.78	2.25	0.669202	0.712213	0.732311	7.3367	6.78603	6.06185
2013	2013-09-16	259	19	1.59	2.5	2.01	0.669109	0.712203	0.732282	7.44817	6.89937	6.18081
2013	2013-09-16	259	20	1.48	2.26	2.05	0.669028	0.712168	0.732259	7.48619	6.97594	6.2675
2013	2013-09-16	259	21	1.47	2.33	2.11	0.668952	0.71212	0.732244	7.4622	7.01163	6.31726
2013	2013-09-16	259	22	1.43	2.01	1.45	0.668892	0.712072	0.732233	7.41796	7.03891	6.3682
2013	2013-09-16	259	23	1.39	2.15	1.31	0.668841	0.712004	0.732215	7.35622	7.04452	6.38655
2013	2013-09-17	260	0	1.38	1.93	1.06	0.668804	0.71191	0.732203	7.25931	7.01563	6.37084
2013	2013-09-17	260	1	1.38	1.89	0.86	0.668764	0.711692	0.732195	7.12646	6.95666	6.31634
2013	2013-09-17	260	2	1.35	2.02	0.83	0.668733	0.711404	0.732182	6.96982	6.86903	6.2325
2013	2013-09-17	260	3	1.28	1.96	0.86	0.668723	0.711342	0.732172	6.80809	6.76997	6.13269
2013	2013-09-17	260	4	1.36	1.91	0.89	0.66871	0.71133	0.732161	6.66855	6.68025	6.03811
2013	2013-09-17	260	5	1.37	1.99	1.01	0.66869	0.71132	0.732157	6.52626	6.58258	5.93215
2013	2013-09-17	260	6	1.21	1.92	0.93	0.668679	0.711308	0.732144	6.39379	6.48655	5.82369
2013	2013-09-17	260	7	1.23	2.13	1.03	0.668678	0.711297	0.732129	6.27491	6.39509	5.72472
2013	2013-09-17	260	8	1.5	1.76	1.08	0.668693	0.711283	0.732116	6.15727	6.29591	5.61949
2013	2013-09-17	260	9	1.28	1.82	1.17	0.668685	0.711276	0.732097	6.05436	6.19694	5.52
2013	2013-09-17	260	10	0.86	1.97	1.46	0.66886	0.711273	0.732172	5.9983	6.12184	5.45343
2013	2013-09-17	260	11	1.04	2.05	2.23	0.669124	0.711303	0.732437	6.04238	6.1038	5.4332
2013	2013-09-17	260	12	1.24	1.85	1.96	0.66951	0.711343	0.732606	6.21448	6.1711	5.47817
2013	2013-09-17	260	13	1.54	2.11	2.04	0.669948	0.711384	0.732707	6.29868	6.16696	5.4473
2013	2013-09-17	260	14	1.35	2.52	2.64	0.670385	0.71142	0.732763	6.60971	6.29644	5.56395
2013	2013-09-17	260	15	1.4	2.34	2.28	0.670739	0.711445	0.732787	6.96269	6.44668	5.70499
2013	2013-09-17	260	16	1.41	2.41	2.31	0.670986	0.711467	0.732794	7.2562	6.57251	5.82401
2013	2013-09-17	260	17	1.43	2.18	1.94	0.671166	0.711487	0.732792	7.49851	6.69658	5.95452
2013	2013-09-17	260	18	1.41	2.34	2.03	0.671293	0.711505	0.732779	7.66406	6.79905	6.06304
2013	2013-09-17	260	19	1.4	2.28	1.71	0.671356	0.711522	0.73278	7.7781	6.89223	6.16454
2013	2013-09-17	260	20	1.41	2.13	1.89	0.671386	0.711538	0.73277	7.83109	6.95915	6.24055
2013	2013-09-17	260	21	1.44	2.48	1.8	0.671405	0.711553	0.732748	7.83803	7.00179	6.29594
2013	2013-09-17	260	22	1.41	2.3	1.81	0.671451	0.711566	0.732731	7.81634	7.02555	6.33681
2013	2013-09-17	260	23	1.41	2.24	1.78	0.67144	0.711578	0.732715	7.79755	7.05038	6.37891
2013	2013-09-18	261	0	1.4	2.39	1.99	0.67141	0.711589	0.732701	7.77335	7.07344	6.41667
2013	2013-09-18	261	1	1.51	2.21	1.93	0.671375	0.711599	0.732686	7.72698	7.07794	6.43996
2013	2013-09-18	261	2	1.4	2.25	2.44	0.671334	0.711606	0.732675	7.69652	7.10356	6.48004
2013	2013-09-18	261	3	1.37	2.24	1.73	0.671285	0.711615	0.732657	7.66066	7.12015	6.51781
2013	2013-09-18	261	4	1.33	2.22	1.51	0.671245	0.711621	0.73264	7.57779	7.10731	6.50794
2013	2013-09-18	261	5	1.34	2.2	1.34	0.671209	0.711626	0.732626	7.44861	7.05202	6.46787
2013	2013-09-18	261	6	1.32	2.16	1.57	0.671199	0.71163	0.732613	7.35045	7.00722	6.43745
2013	2013-09-18	261	7	1.31	2.05	1.81	0.671166	0.711635	0.732601	7.28492	6.97701	6.41896
2013	2013-09-18	261	8	1.36	2.29	1.75	0.67113	0.71164	0.732589	7.22562	6.94474	6.40765
2013	2013-09-18	261	9	1.38	2.1	1.7	0.671104	0.711645	0.732575	7.17857	6.91874	6.39051
2013	2013-09-18	261	10	1.41	2.38	1.89	0.671057	0.711648	0.732551	7.16039	6.89263	6.36883
2013	2013-09-18	261	11	1.47	2.06	1.9	0.670998	0.711647	0.732542	7.23912	6.92455	6.40193
2013	2013-09-18	261	12	1.54	2.15	2.01	0.670935	0.711648	0.732539	7.35018	6.96664	6.43684
2013	2013-09-18	261	13	1.79	2.17	1.89	0.67087	0.711648	0.73254	7.50763	7.02738	6.49379
2013	2013-09-18	261	14	1.78	2.23	2.15	0.670816	0.71165	0.732534	7.71665	7.12844	6.58313
2013	2013-09-18	261	15	1.62	2.17	2.27	0.670789	0.711655	0.732505	7.87139	7.2032	6.64582
2013	2013-09-18	261	16	1.57	2.45	1.93	0.670734	0.711659	0.732485	7.99671	7.27823	6.70274
2013	2013-09-18	261	17	1.78	2.58	2	0.670696	0.711665	0.732477	8.07723	7.32811	6.74624
2013	2013-09-18	261	18	1.65	2.36	2.04	0.670647	0.711669	0.732475	8.18338	7.40273	6.8233
2013	2013-09-18	261	19	1.59	2.32	1.99	0.670619	0.711673	0.732496	8.26653	7.47267	6.89975
2013	2013-09-18	261	20	1.57	2.32	2.15	0.670649	0.71169	0.73257	8.30143	7.51779	6.95626
2013	2013-09-18	261	21	1.2	2.15	2.32	0.670754	0.711724	0.732758	8.32356	7.56051	7.01406
2013	2013-09-18	261	22	0.72	1.84	2.12	0.673757	0.712807	0.734221	8.34443	7.60327	7.06781
2013	2013-09-18	261	23	0.55	1.88	1.8	0.681041	0.713577	0.73494	8.35454	7.64312	7.12303
2013	2013-09-19	262	0	0.9	1.8	1.75	0.686046	0.713483	0.735196	8.43297	7.73863	7.24318
2013	2013-09-19	262	1	1	1.84	1.82	0.685347	0.713336	0.735223	8.41823	7.76289	7.29223
2013	2013-09-19	262	2	1.17	1.84	1.78	0.684161	0.713239	0.73515	8.36327	7.76559	7.31571
2013	2013-09-19	262	3	1.22	1.76	2.14	0.683078	0.713195	0.735115	8.3154	7.76645	7.33236
2013	2013-09-19	262	4	1.14	1.81	2.18	0.682137	0.713231	0.735102	8.26116	7.75158	7.33283
2013	2013-09-19	262	5	1.13	1.75	1.89	0.681499	0.713326	0.735146	8.20166	7.72502	7.32026
2013	2013-09-19	262	6	1.24	1.8	1.98	0.681096	0.713291	0.735142	8.15445	7.71132	7.31609
2013	2013-09-19	262	7	1.24	1.9	1.95	0.680631	0.713228	0.735098	8.11143	7.69579	7.31008
2013	2013-09-19	262	8	1.22	2.21	1.76	0.680159	0.713171	0.735054	8.03612	7.66195	7.27355
2013	2013-09-19	262	9	1.32	2.07	1.86	0.679724	0.713127	0.734997	7.9512	7.612	7.23826
2013	2013-09-19	262	10	1.41	2.06	1.95	0.679324	0.713088	0.734949	7.8975	7.579	7.20327
2013	2013-09-19	262	11	1.34	2.05	1.86	0.678975	0.713054	0.734917	7.89291	7.5632	7.18755
2013	2013-09-19	262	12	1.47	2.06	2.46	0.678823	0.713026	0.734927	7.93407	7.5525	7.17072
2013	2013-09-19	262	13	1.55	2.13	2.23	0.678633	0.712995	0.734937	8.1231	7.6659	7.26389
2013	2013-09-19	262	14	1.73	2.45	2.18	0.678359	0.712966	0.734906	8.27967	7.73459	7.31532
2013	2013-09-19	262	15	1.68	2.44	1.88	0.678033	0.712937	0.734869	8.51262	7.80506	7.38887
2013	2013-09-19	262	16	1.61	2.4	2.16	0.677676	0.712908	0.734832	8.69499	7.87389	7.44319
2013	2013-09-19	262	17	1.71	2.12	2.3	0.677329	0.712877	0.734786	8.84235	7.94826	7.53345
2013	2013-09-19	262	18	1.65	2.39	1.96	0.677	0.71285	0.734726	8.91695	8.00786	7.60701
2013	2013-09-19	262	19	1.66	2.2	1.88	0.676757	0.712839	0.734671	8.90637	8.03273	7.63872
2013	2013-09-19	262	20	1.54	2.01	2.06	0.676545	0.712828	0.734612	8.84531	8.02491	7.63744
2013	2013-09-19	262	21	1.31	2.29	1.73	0.676385	0.712813	0.734551	8.76895	7.99465	7.62598
2013	2013-09-19	262	22	1.54	2.03	1.85	0.676336	0.712808	0.734535	8.67528	7.95846	7.59864
2013	2013-09-19	262	23	1.52	1.93	1.79	0.676286	0.712812	0.734508	8.60014	7.94102	7.58114
2013	2013-09-20	263	0	0.55	1.97	1.71	0.677787	0.713318	0.735022	8.52932	7.92096	7.56709
2013	2013-09-20	263	1	0.67	2.15	1.64	0.683317	0.713701	0.735817	8.44222	7.89134	7.54248
2013	2013-09-20	263	2	1	1.99	1.73	0.686017	0.713606	0.736077	8.39031	7.8794	7.53481
2013	2013-09-20	263	3	1.06	1.94	1.86	0.685641	0.713464	0.73596	8.35559	7.8721	7.53765
2013	2013-09-20	263	4	1.25	1.97	1.45	0.684768	0.713375	0.735848	8.31963	7.87782	7.53835
2013	2013-09-20	263	5	1.16	1.84	1.21	0.683885	0.713314	0.735726	8.212	7.82891	7.48607
2013	2013-09-20	263	6	1.11	1.95	1.47	0.683085	0.713276	0.735659	8.09093	7.77538	7.4293
2013	2013-09-20	263	7	1.27	2.06	1.37	0.68236	0.713267	0.735577	7.97256	7.7142	7.36752
2013	2013-09-20	263	8	1.14	1.98	1.61	0.681848	0.713275	0.735536	7.868	7.65045	7.3052
2013	2013-09-20	263	9	1.16	1.9	1.68	0.681526	0.71334	0.735556	7.75932	7.57376	7.23218
2013	2013-09-20	263	10	1.03	2	1.61	0.681258	0.713368	0.735618	7.69539	7.51742	7.17913
2013	2013-09-20	263	11	1.25	2.29	1.6	0.681409	0.71343	0.735783	7.65515	7.46752	7.13539
2013	2013-09-20	263	12	1.35	2.01	1.6	0.681477	0.713406	0.735791	7.76644	7.52622	7.17842
2013	2013-09-20	263	13	1.11	1.84	1.76	0.681544	0.713385	0.735823	7.82661	7.53844	7.17428
2013	2013-09-20	263	14	1.25	1.96	2.21	0.682057	0.71343	0.73593	7.88336	7.52648	7.16128
2013	2013-09-20	263	15	1.17	2.1	1.89	0.682648	0.713464	0.736022	8.00443	7.55322	7.17485
2013	2013-09-20	263	16	1.27	2.18	1.88	0.683214	0.713488	0.736022	8.09735	7.57574	7.19743
2013	2013-09-20	263	17	1.73	2.02	1.85	0.682999	0.713441	0.735938	8.15342	7.6043	7.21755
2013	2013-09-20	263	18	1.48	2.04	1.91	0.682488	0.713392	0.735836	8.20731	7.64457	7.26256
2013	2013-09-20	263	19	1.38	2.01	1.59	0.681925	0.713347	0.735761	8.29829	7.73584	7.35032
2013	2013-09-20	263	20	1.42	2.2	1.5	0.681387	0.713309	0.735646	8.27421	7.74258	7.3533
2013	2013-09-20	263	21	1.28	1.93	1.17	0.680874	0.713269	0.735523	8.19146	7.72446	7.33369
2013	2013-09-20	263	22	1.25	1.85	1.04	0.680392	0.713231	0.735401	8.06843	7.67335	7.27945
2013	2013-09-20	263	23	1.13	2.01	1.01	0.679958	0.713194	0.735305	7.92005	7.60755	7.19963
2013	2013-09-21	264	0	1.36	1.82	0.84	0.679576	0.713159	0.735223	7.74886	7.51276	7.09784
2013	2013-09-21	264	1	1.16	1.99	0.82	0.67922	0.713127	0.735147	7.55946	7.40259	6.97398
2013	2013-09-21	264	2	1.2	1.81	0.91	0.678902	0.713098	0.735081	7.35917	7.27903	6.83281
2013	2013-09-21	264	3	1.18	1.62	0.86	0.678623	0.713068	0.735016	7.157	7.14171	6.68004
2013	2013-09-21	264	4	1.12	1.7	0.86	0.678422	0.713039	0.734937	6.9678	7.01458	6.52505
2013	2013-09-21	264	5	1.08	1.84	0.9	0.678222	0.713009	0.73487	6.78309	6.88531	6.37293
2013	2013-09-21	264	6	1.08	1.72	0.89	0.678034	0.712988	0.73481	6.60471	6.75619	6.22423
2013	2013-09-21	264	7	1.11	1.75	0.77	0.677853	0.712966	0.734747	6.43305	6.63325	6.07917
2013	2013-09-21	264	8	1.23	1.78	0.83	0.67769	0.712947	0.734676	6.25865	6.50531	5.92956
2013	2013-09-21	264	9	1.11	1.72	1.05	0.677503	0.712929	0.734598	6.07011	6.36334	5.76981
2013	2013-09-21	264	10	1.17	1.65	1.21	0.677401	0.712922	0.734543	5.86519	6.16925	5.58323
2013	2013-09-21	264	11	1.33	1.71	1.6	0.677315	0.712914	0.734482	5.78168	6.0404	5.45343
2013	2013-09-21	264	12	1.39	1.85	1.56	0.677211	0.712909	0.73443	6.02488	6.15475	5.52111
2013	2013-09-21	264	13	1.49	1.74	1.79	0.677105	0.712905	0.734389	6.23522	6.22724	5.55751
2013	2013-09-21	264	14	1.55	1.93	1.55	0.677029	0.712901	0.734354	6.48163	6.28032	5.60238
2013	2013-09-21	264	15	1.58	2.08	1.34	0.676966	0.712895	0.734363	6.80255	6.3988	5.67712
2013	2013-09-21	264	16	1.64	1.94	1.84	0.676829	0.712884	0.734383	7.09966	6.52852	5.79027
2013	2013-09-21	264	17	1.58	1.97	1.4	0.676627	0.712871	0.734351	7.36321	6.67753	5.94283
2013	2013-09-21	264	18	1.54	1.93	1.46	0.676424	0.712859	0.734306	7.55346	6.80823	6.08322
2013	2013-09-21	264	19	1.52	1.95	1.74	0.676239	0.712853	0.734273	7.66004	6.90938	6.19294
2013	2013-09-21	264	20	1.4	1.77	1.49	0.676069	0.712847	0.73424	7.70632	7.00519	6.29062
2013	2013-09-21	264	21	1.34	1.84	1.2	0.675901	0.712842	0.734207	7.66106	7.02768	6.32656
2013	2013-09-21	264	22	1.36	1.69	1.11	0.675745	0.712835	0.734174	7.57363	7.02483	6.33319
2013	2013-09-21	264	23	1.25	1.66	1.03	0.67559	0.712826	0.734144	7.4648	7.00299	6.32228
2013	2013-09-22	265	0	1.11	1.67	0.88	0.675493	0.712817	0.734113	7.32999	6.9506	6.2815
2013	2013-09-22	265	1	1.22	1.73	0.83	0.675381	0.712806	0.734074	7.16542	6.87446	6.20697
2013	2013-09-22	265	2	1.12	1.62	0.83	0.675275	0.712794	0.734042	7.01785	6.80239	6.14014
2013	2013-09-22	265	3	1.2	1.61	0.92	0.675151	0.712784	0.73401	6.85066	6.7055	6.04981
2013	2013-09-22	265	4	1.29	1.64	0.84	0.675042	0.712772	0.733978	6.68511	6.61115	5.95222
2013	2013-09-22	265	5	1.18	1.53	1.05	0.674949	0.712764	0.733943	6.4985	6.47992	5.8309
2013	2013-09-22	265	6	1.2	1.65	1.15	0.674867	0.712755	0.733911	6.3988	6.4081	5.76507
2013	2013-09-22	265	7	1.18	1.55	1.14	0.674806	0.712748	0.733883	6.33541	6.37042	5.72255
2013	2013-09-22	265	8	1.22	1.57	1.16	0.674739	0.712742	0.733855	6.22782	6.29904	5.65531
2013	2013-09-22	265	9	1.23	1.61	1.17	0.674668	0.712739	0.733822	6.08791	6.19155	5.55851
2013	2013-09-22	265	10	1.37	1.64	1.42	0.674597	0.712734	0.733792	5.94447	6.06241	5.4537
2013	2013-09-22	265	11	1.38	1.75	1.58	0.674518	0.712732	0.733766	5.82192	5.92281	5.31916
2013	2013-09-22	265	12	1.52	1.81	1.95	0.674394	0.712679	0.733742	6.02994	6.01598	5.37986
2013	2013-09-22	265	13	2.12	1.82	1.5	0.674242	0.712543	0.733722	6.33864	6.2188	5.56844
2013	2013-09-22	265	14	1.81	1.9	1.79	0.674064	0.712526	0.733698	6.70995	6.33162	5.72467
2013	2013-09-22	265	15	1.71	1.95	1.97	0.673914	0.712503	0.733666	7.27083	6.53002	5.90178
2013	2013-09-22	265	16	2.28	1.97	1.88	0.673724	0.712484	0.733647	7.66061	6.66656	6.01323
2013	2013-09-22	265	17	1.88	2.15	1.93	0.673525	0.712451	0.733626	7.92103	6.81841	6.20518
2013	2013-09-22	265	18	1.66	2.08	2.04	0.673335	0.712436	0.733599	8.07606	6.94323	6.35347
2013	2013-09-22	265	19	1.65	1.93	2.03	0.673173	0.712426	0.733576	8.17431	7.06076	6.47945
2013	2013-09-22	265	20	1.68	1.91	1.62	0.673022	0.71242	0.733548	8.20128	7.15243	6.58175
2013	2013-09-22	265	21	1.49	1.89	1.41	0.672915	0.712412	0.733519	8.12723	7.17848	6.62314
2013	2013-09-22	265	22	1.7	1.84	1.3	0.672789	0.712404	0.733496	8.01192	7.16168	6.61312
2013	2013-09-22	265	23	1.48	1.8	1.33	0.672664	0.712395	0.733474	7.87716	7.1299	6.58758
2013	2013-09-23	266	0	1.46	1.76	1.09	0.67257	0.712386	0.733461	7.7508	7.11022	6.56732
2013	2013-09-23	266	1	1.37	1.69	1	0.67249	0.712377	0.733446	7.59778	7.05075	6.51962
2013	2013-09-23	266	2	1.36	1.85	0.86	0.672416	0.712364	0.733426	7.42957	6.98096	6.44417
2013	2013-09-23	266	3	1.27	1.7	0.91	0.672343	0.712351	0.733397	7.26022	6.89642	6.36337
2013	2013-09-23	266	4	1.3	1.63	0.9	0.67228	0.712339	0.733375	7.08388	6.80704	6.26805
2013	2013-09-23	266	5	1.36	1.74	0.81	0.672216	0.712326	0.733357	6.89916	6.70075	6.1538
2013	2013-09-23	266	6	1.35	1.54	0.82	0.672164	0.712308	0.733334	6.71661	6.59402	6.03474
2013	2013-09-23	266	7	1.25	1.55	0.82	0.67211	0.712293	0.733312	6.54088	6.48344	5.91818
2013	2013-09-23	266	8	1.21	1.53	1.04	0.672069	0.712281	0.733288	6.34806	6.34955	5.78257
2013	2013-09-23	266	9	1.34	1.55	1.07	0.672035	0.712272	0.733263	6.15035	6.19286	5.63778
2013	2013-09-23	266	10	1.32	1.71	1.35	0.672001	0.712264	0.733232	5.97809	6.0366	5.49934
2013	2013-09-23	266	11	1.39	1.81	1.38	0.671985	0.712255	0.733209	5.76153	5.81735	5.29893
2013	2013-09-23	266	12	1.52	2.09	1.44	0.671932	0.71224	0.73319	6.00986	5.9599	5.39074
2013	2013-09-23	266	13	1.88	2.13	1.62	0.671839	0.71222	0.733152	6.29112	6.11455	5.53187
2013	2013-09-23	266	14	2.07	2.08	2.89	0.67172	0.712194	0.733126	6.7198	6.25724	5.68098
2013	2013-09-23	266	15	1.79	2.13	2.54	0.671606	0.712178	0.733101	7.2893	6.44127	5.86545
2013	2013-09-23	266	16	1.91	2.29	2.45	0.671458	0.712163	0.733083	7.69634	6.57646	5.94474
2013	2013-09-23	266	17	1.81	2.3	1.95	0.671297	0.712147	0.733063	7.98278	6.74462	6.18337
2013	2013-09-23	266	18	1.82	2.18	2.51	0.671196	0.712138	0.733043	8.14525	6.87287	6.32927
2013	2013-09-23	266	19	1.76	2.25	2.88	0.671099	0.71213	0.733028	8.24431	6.98984	6.45941
2013	2013-09-23	266	20	1.84	2.25	2.27	0.671016	0.712124	0.733018	8.27327	7.07334	6.55348
2013	2013-09-23	266	21	1.78	2.12	1.79	0.670938	0.712124	0.733008	8.2166	7.11677	6.60778
2013	2013-09-23	266	22	1.6	2.07	1.53	0.670855	0.712119	0.732994	8.12158	7.12778	6.63413
2013	2013-09-23	266	23	1.48	2	1.41	0.670772	0.712112	0.73297	8.00395	7.1193	6.62512
2013	2013-09-24	267	0	1.46	1.97	1.19	0.670705	0.712104	0.732947	7.8594	7.08541	6.59499
2013	2013-09-24	267	1	1.27	1.88	0.96	0.670641	0.712094	0.732923	7.68835	7.0217	6.53208
2013	2013-09-24	267	2	1.49	2.07	0.98	0.67058	0.712084	0.732897	7.49214	6.93379	6.43614
2013	2013-09-24	267	3	1.43	1.78	0.87	0.670531	0.712073	0.732877	7.27402	6.81578	6.30749
2013	2013-09-24	267	4	1.3	1.78	0.94	0.670497	0.712062	0.732861	7.07735	6.70902	6.19034
2013	2013-09-24	267	5	1.22	1.79	0.88	0.670467	0.712049	0.732846	6.88512	6.59538	6.06891
2013	2013-09-24	267	6	1.21	1.69	0.78	0.670451	0.712035	0.732831	6.69282	6.47698	5.94083
2013	2013-09-24	267	7	1.27	1.74	0.93	0.670485	0.712021	0.732821	6.49611	6.35384	5.79747
2013	2013-09-24	267	8	1.26	1.74	0.94	0.670465	0.712009	0.732804	6.29234	6.21307	5.64014
2013	2013-09-24	267	9	1.62	1.7	1.33	0.670462	0.711999	0.732775	6.06584	6.03425	5.46328
2013	2013-09-24	267	10	1.63	1.81	1.51	0.670466	0.711996	0.732727	5.89772	5.88919	5.33001
2013	2013-09-24	267	11	1.43	2.14	1.55	0.3693	0.6539	0.6873
2013	2013-09-24	267	12	1.57	1.86	1.74	0.669788	0.711854	0.732588	5.90076	5.76873	5.15442
2013	2013-09-24	267	13	2.24	1.92	2.11	0.670339	0.711954	0.732655	6.24549	5.98537	5.35016
2013	2013-09-24	267	14	2.08	2.09	2.25	0.67022	0.711929	0.73263	6.74346	6.18049	5.55011
2013	2013-09-24	267	15	2.31	2.61	1.95	0.670093	0.711889	0.732598	7.3375	6.37499	5.73943
2013	2013-09-24	267	16	1.87	2.16	1.69	0.669947	0.711859	0.732588	7.80475	6.55761	5.84544
2013	2013-09-24	267	17	1.92	2.49	1.82	0.669788	0.711844	0.732567	8.13416	6.75246	6.11223
2013	2013-09-24	267	18	2.19	2.59	2.18	0.669635	0.711832	0.732539	8.3518	6.91994	6.29423
2013	2013-09-24	267	19	1.83	2.48	2.19	0.669515	0.711824	0.732512	8.5056	7.06669	6.46903
2013	2013-09-24	267	20	1.8	2.31	2.8	0.669395	0.711818	0.732497	8.56531	7.16845	6.58926
2013	2013-09-24	267	21	1.71	2.24	2.04	0.669312	0.711813	0.732478	8.54939	7.2298	6.66808
2013	2013-09-24	267	22	1.77	2.13	1.74	0.669235	0.711809	0.732459	8.47034	7.25923	6.71751
2013	2013-09-24	267	23	1.58	2.1	1.43	0.669168	0.711802	0.732441	8.36165	7.25465	6.73421
2013	2013-09-25	268	0	1.77	2.06	1.4	0.669111	0.711795	0.732424	8.23475	7.2332	6.71845
2013	2013-09-25	268	1	1.44	2.02	1.06	0.669061	0.711785	0.732408	8.08707	7.19522	6.68791
2013	2013-09-25	268	2	1.5	2.16	0.98	0.669018	0.711776	0.732393	7.90931	7.12192	6.61694
2013	2013-09-25	268	3	1.41	2.15	1.04	0.668983	0.711765	0.732376	7.71879	7.02964	6.5228
2013	2013-09-25	268	4	1.48	2.17	1	0.66896	0.711758	0.732362	7.55358	6.95192	6.44342
2013	2013-09-25	268	5	1.42	1.99	0.98	0.668942	0.711747	0.732349	7.39015	6.87004	6.35562
2013	2013-09-25	268	6	1.29	1.82	0.81	0.668929	0.711735	0.732337	7.21143	6.77072	6.25078
2013	2013-09-25	268	7	1.25	1.99	1.11	0.66892	0.711722	0.732327	7.02246	6.65733	6.12399
2013	2013-09-25	268	8	1.34	1.71	0.9	0.668917	0.711709	0.732308	6.81431	6.51883	5.96833
2013	2013-09-25	268	9	1.58	2.04	1.39	0.668918	0.711696	0.732287	6.57839	6.33636	5.78403
2013	2013-09-25	268	10	1.87	1.94	1.87	0.668909	0.71169	0.732273	6.38429	6.16714	5.62927
2013	2013-09-25	268	11	1.56	1.94	1.99	0.668902	0.711686	0.732259	6.3959	6.14407	5.5915
2013	2013-09-25	268	12	1.71	2.03	2.24	0.668873	0.711678	0.732243	6.62257	6.28196	5.69505
2013	2013-09-25	268	13	1.68	2.12	1.81	0.668817	0.71167	0.732228	6.81929	6.37716	5.76036
2013	2013-09-25	268	14	1.6	2.03	2.03	0.66875	0.711664	0.732213	6.98759	6.44893	5.81483
2013	2013-09-25	268	15	1.66	2.53	1.88	0.668669	0.71149	0.732192	7.1774	6.53608	5.88002
2013	2013-09-25	268	16	1.87	2.15	1.61	0.668581	0.711332	0.732164	7.31607	6.62559	5.93156
2013	2013-09-25	268	17	1.77	2.42	1.54	0.668481	0.711317	0.732142	7.52628	6.76103	6.04702
2013	2013-09-25	268	18	2.01	2.29	1.85	0.668375	0.711303	0.732128	7.69051	6.87141	6.15037
2013	2013-09-25	268	19	2.09	2.19	1.8	0.668286	0.711262	0.732118	7.78818	6.95627	6.2305
2013	2013-09-25	268	20	2.04	2.66	2.04	0.668209	0.711196	0.73211	7.82885	7.01226	6.2901
2013	2013-09-25	268	21	2.04	2.34	2.15	0.668133	0.711037	0.732099	7.83277	7.04716	6.33404
2013	2013-09-25	268	22	1.69	2.14	2.01	0.668078	0.711027	0.732089	7.82985	7.07967	6.37767
2013	2013-09-25	268	23	1.79	2.24	1.84	0.668028	0.71102	0.732082	7.83026	7.12607	6.43049
2013	2013-09-26	269	0	1.58	2.25	1.87	0.667981	0.711013	0.732073	7.7874	7.13828	6.46235
2013	2013-09-26	269	1	2.21	2.06	1.55	0.66794	0.711005	0.73206	7.71809	7.13192	6.46335
2013	2013-09-26	269	2	1.48	2.09	1.25	0.667903	0.710995	0.732034	7.6234	7.10699	6.45072
2013	2013-09-26	269	3	1.59	2.04	1.16	0.667861	0.710988	0.732022	7.5101	7.06179	6.41766
2013	2013-09-26	269	4	1.53	1.89	0.87	0.667834	0.710979	0.732009	7.38383	7.00637	6.37314
2013	2013-09-26	269	5	1.34	1.94	0.88	0.667803	0.71097	0.731996	7.23621	6.92397	6.29973
2013	2013-09-26	269	6	1.36	1.85	0.76	0.667776	0.710959	0.731984	7.07321	6.82603	6.20244
2013	2013-09-26	269	7	1.43	2	0.73	0.667759	0.710948	0.731971	6.87063	6.7016	6.0637
2013	2013-09-26	269	8	1.4	1.95	1	0.667744	0.71094	0.73195	6.64329	6.5393	5.8841
2013	2013-09-26	269	9	1.39	2.03	1.25	0.667455	0.710933	0.731935	6.45904	6.38109	5.72827
2013	2013-09-26	269	10	1.88	2.07	1.42	0.667518	0.710925	0.731919	6.31202	6.24072	5.5968
2013	2013-09-26	269	11	1.59	2.33	1.6	0.667498	0.71091	0.731896	6.09605	6.02618	5.37709
2013	2013-09-26	269	12	1.49	2.23	1.58	0.667443	0.710886	0.731879	6.43231	6.23982	5.5731
2013	2013-09-26	269	13	1.98	2.18	1.43	0.667362	0.710857	0.731851	6.6474	6.37345	5.66417
2013	2013-09-26	269	14	1.73	2.46	2.02	0.667285	0.71083	0.731817	6.97024	6.46711	5.75462
2013	2013-09-26	269	15	1.68	2.5	1.96	0.667194	0.710807	0.731782	7.41904	6.61043	5.88624
2013	2013-09-26	269	16	1.64	2.86	1.79	0.667065	0.710782	0.731761	7.71309	6.69121	5.9482
2013	2013-09-26	269	17	1.99	2.88	1.81	0.666934	0.71076	0.731739	7.93078	6.80667	6.08148
2013	2013-09-26	269	18	1.74	2.39	2.03	0.666818	0.710735	0.73172	8.02495	6.8855	6.16094
2013	2013-09-26	269	19	1.66	2.27	2.2	0.666721	0.710715	0.731708	8.05261	6.94538	6.22344
2013	2013-09-26	269	20	2.12	1.97	1.41	0.666632	0.710697	0.7317	8.053	7.01311	6.29834
2013	2013-09-26	269	21	1.53	2.19	1.32	0.666563	0.710687	0.731689	7.97741	7.0085	6.30925
2013	2013-09-26	269	22	1.67	1.92	0.99	0.666505	0.710677	0.731683	7.85157	6.97256	6.28701
2013	2013-09-26	269	23	1.71	2.27	0.96	0.666456	0.710666	0.73167	7.68144	6.91097	6.22242
2013	2013-09-27	270	0	1.53	1.74	0.88	0.666405	0.710654	0.731657	7.50276	6.8266	6.14432
2013	2013-09-27	270	1	1.56	1.88	1.02	0.666377	0.710643	0.731643	7.31153	6.72552	6.04422
2013	2013-09-27	270	2	1.41	2.01	0.88	0.666343	0.710633	0.731629	7.14328	6.63802	5.95607
2013	2013-09-27	270	3	1.35	2.1	0.88	0.666324	0.710623	0.731615	6.98369	6.54917	5.86774
2013	2013-09-27	270	4	1.28	1.76	0.89	0.666302	0.710611	0.731605	6.82105	6.4583	5.77389
2013	2013-09-27	270	5	1.34	1.83	0.72	0.66628	0.7106	0.731592	6.65904	6.36191	5.67655
2013	2013-09-27	270	6	1.31	1.64	0.8	0.666269	0.710591	0.731585	6.49904	6.25965	5.5747
2013	2013-09-27	270	7	1.35	1.93	0.77	0.66624	0.710581	0.731573	6.32101	6.14823	5.45171
2013	2013-09-27	270	8	1.32	1.75	0.93	0.666242	0.710568	0.731559	6.13178	6.00874	5.31332
2013	2013-09-27	270	9	1.39	1.84	1.22	0.666248	0.710561	0.731546	5.93592	5.85045	5.16557
2013	2013-09-27	270	10	1.45	1.84	1.32	0.666252	0.710553	0.731529	5.78173	5.70927	5.0408
2013	2013-09-27	270	11	1.64	1.88	1.4	0.666231	0.710539	0.73151	5.54143	5.46303	4.78847
2013	2013-09-27	270	12	1.5	2.03	1.83	0.66617	0.710521	0.731485	5.88245	5.68804	5.00691
2013	2013-09-27	270	13	2.15	1.92	1.58	0.666099	0.710493	0.731451	6.19484	5.90246	5.17546
2013	2013-09-27	270	14	1.84	2.49	1.67	0.666003	0.710467	0.731427	6.70411	6.09141	5.37902
2013	2013-09-27	270	15	1.73	2.83	1.91	0.665867	0.710437	0.731392	7.24885	6.25047	5.55305
2013	2013-09-27	270	16	2.16	2.62	1.74	0.66571	0.710403	0.731377	7.61661	6.38025	5.66687
2013	2013-09-27	270	17	2.14	2.57	1.79	0.66547	0.710378	0.731348	7.8351	6.51459	5.85239
2013	2013-09-27	270	18	1.78	2.91	1.81	0.665295	0.710341	0.731321	7.98771	6.66352	6.03176
2013	2013-09-27	270	19	1.66	2.22	1.92	0.665159	0.710318	0.731302	8.03031	6.75769	6.13464
2013	2013-09-27	270	20	1.69	2.19	1.75	0.665045	0.710304	0.731283	8.00521	6.81839	6.21621
2013	2013-09-27	270	21	1.65	2.28	1.81	0.664953	0.710287	0.731264	7.90557	6.82354	6.23628
2013	2013-09-27	270	22	1.55	2.15	1.73	0.664878	0.710274	0.731253	7.80129	6.81445	6.23931
2013	2013-09-27	270	23	1.53	2.3	1.29	0.664813	0.710263	0.731237	7.682	6.79479	6.21889
2013	2013-09-28	271	0	1.46	2.2	1.38	0.664753	0.710251	0.731224	7.5499	6.7578	6.18502
2013	2013-09-28	271	1	1.44	1.92	1.35	0.664699	0.710237	0.731205	7.41703	6.7152	6.14507
2013	2013-09-28	271	2	1.39	1.87	1.06	0.664651	0.710224	0.731179	7.25957	6.64335	6.07158
2013	2013-09-28	271	3	1.39	1.99	1	0.664612	0.710214	0.731164	7.11158	6.57328	6.00349
2013	2013-09-28	271	4	1.51	1.91	0.86	0.664578	0.710205	0.731154	6.96772	6.50502	5.93444
2013	2013-09-28	271	5	1.41	1.78	0.96	0.664555	0.710191	0.731149	6.82618	6.42597	5.86601
2013	2013-09-28	271	6	1.33	1.98	0.87	0.66453	0.71018	0.731139	6.66054	6.33088	5.76714
2013	2013-09-28	271	7	1.48	1.99	0.75	0.664499	0.710166	0.731131	6.49614	6.22641	5.65583
2013	2013-09-28	271	8	1.28	1.78	0.83	0.664491	0.710155	0.731118	6.29045	6.08905	5.50131
2013	2013-09-28	271	9	1.42	1.68	1.06	0.664486	0.710146	0.731097	6.06054	5.90323	5.32431
2013	2013-09-28	271	10	1.72	1.93	1.49	0.664477	0.710132	0.731075	5.91434	5.76662	5.19974
2013	2013-09-28	271	11	1.59	2.01	1.44	0.664428	0.710101	0.731056	5.6573	5.50234	4.92884
2013	2013-09-28	271	12	1.46	2.13	1.43	0.664355	0.710079	0.731038	6.04558	5.76293	5.17141
2013	2013-09-28	271	13	2.3	2.17	1.64	0.66427	0.710056	0.731009	6.36504	5.96071	5.33917
2013	2013-09-28	271	14	1.87	2.19	1.93	0.664172	0.710034	0.730986	6.87224	6.14577	5.5358
2013	2013-09-28	271	15	1.87	2.3	1.92	0.66404	0.71	0.730956	7.39785	6.31797	5.68921
2013	2013-09-28	271	16	2.04	2.3	1.71	0.663875	0.709977	0.730943	7.75166	6.4573	5.81771
2013	2013-09-28	271	17	2.23	2.52	1.84	0.663708	0.709945	0.730918	7.9889	6.61849	6.00962
2013	2013-09-28	271	18	2.21	2.57	2.22	0.663557	0.709921	0.730892	8.12435	6.74995	6.1601
2013	2013-09-28	271	19	1.83	3	2.49	0.66343	0.7099	0.730868	8.21489	6.86678	6.29279
2013	2013-09-28	271	20	1.81	2.51	1.64	0.66333	0.709881	0.730857	8.24689	6.96128	6.39776
2013	2013-09-28	271	21	1.67	2.23	1.48	0.663238	0.709871	0.730839	8.21077	7.02032	6.46979
2013	2013-09-28	271	22	1.74	2.39	1.35	0.663168	0.709861	0.730822	8.10902	7.02143	6.48386
2013	2013-09-28	271	23	1.51	2.13	1.23	0.6631	0.709852	0.73081	7.97828	6.99818	6.45684
2013	2013-09-29	272	0	1.64	2.1	1.01	0.663047	0.709841	0.730803	7.82479	6.95754	6.41107
2013	2013-09-29	272	1	1.42	1.96	1.15	0.663003	0.709827	0.730787	7.64567	6.88201	6.32962
2013	2013-09-29	272	2	1.61	2.16	0.89	0.66296	0.709808	0.730772	7.44966	6.80349	6.21999
2013	2013-09-29	272	3	1.41	1.87	0.78	0.662932	0.709795	0.73076	7.24052	6.70662	6.08739
2013	2013-09-29	272	4	1.27	2.18	0.93	0.66291	0.709784	0.730746	7.05701	6.6073	5.97029
2013	2013-09-29	272	5	1.45	1.8	0.89	0.662893	0.709772	0.730734	6.88076	6.51186	5.84927
2013	2013-09-29	272	6	1.39	2.05	0.77	0.662886	0.709761	0.730719	6.68999	6.40151	5.71041
2013	2013-09-29	272	7	1.31	1.78	0.89	0.662875	0.709751	0.730708	6.52544	6.30392	5.59116
2013	2013-09-29	272	8	1.23	1.87	0.87	0.662857	0.709738	0.730689	6.33613	6.19204	5.44452
2013	2013-09-29	272	9	1.38	2.07	1.14	0.662855	0.709728	0.730671	6.10983	6.01816	5.26952
2013	2013-09-29	272	10	1.59	1.93	1.56	0.662854	0.709719	0.730651	5.95759	5.87237	5.14319
2013	2013-09-29	272	11	1.64	2.43	1.51	0.662816	0.709702	0.730633	5.68471	5.57892	4.85801
2013	2013-09-29	272	12	1.62	2.17	1.79	0.662761	0.709682	0.730617	6.12477	5.84932	5.13537
2013	2013-09-29	272	13	2.34	2.34	1.59	0.662696	0.709652	0.730596	6.46584	6.01542	5.29445
2013	2013-09-29	272	14	1.96	2.21	1.75	0.662593	0.709553	0.730578	6.99659	6.1864	5.48869
2013	2013-09-29	272	15	2.27	2.36	2	0.662456	0.70951	0.730542	7.50457	6.35314	5.64644
2013	2013-09-29	272	16	2.31	2.4	1.55	0.662276	0.709483	0.73053	7.85043	6.49911	5.80101
2013	2013-09-29	272	17	2.34	2.57	2.27	0.662131	0.709452	0.730504	8.08941	6.64253	6.01154
2013	2013-09-29	272	18	2	2.55	2.02	0.661982	0.70943	0.730478	8.24814	6.77507	6.1892
2013	2013-09-29	272	19	2.45	2.89	2.36	0.661845	0.70941	0.730443	8.35612	6.90037	6.34397
2013	2013-09-29	272	20	1.92	3.07	1.82	0.661744	0.709398	0.730416	8.39414	6.99909	6.45669
2013	2013-09-29	272	21	1.79	2.88	1.67	0.661647	0.709385	0.73039	8.37194	7.07578	6.54126
2013	2013-09-29	272	22	1.89	2.46	1.33	0.661569	0.709372	0.730374	8.27808	7.08996	6.57376
2013	2013-09-29	272	23	1.98	2.04	1.23	0.661512	0.709362	0.730357	8.13849	7.06399	6.5409
2013	2013-09-30	273	0	1.84	2.05	0.97	0.661455	0.709347	0.730338	7.97052	7.00656	6.48073
2013	2013-09-30	273	1	1.49	2.05	1.23	0.661413	0.709332	0.730336	7.79928	6.95141	6.4054
2013	2013-09-30	273	2	1.56	2.06	0.91	0.661375	0.709316	0.730328	7.60611	6.8641	6.29755
2013	2013-09-30	273	3	1.69	1.92	0.81	0.661337	0.709297	0.730323	7.42868	6.77915	6.19451
2013	2013-09-30	273	4	1.56	1.91	0.8	0.661313	0.709283	0.730308	7.2434	6.68181	6.07457
2013	2013-09-30	273	5	1.48	2.37	0.93	0.661291	0.709269	0.730297	7.03079	6.57264	5.92228
2013	2013-09-30	273	6	1.38	1.84	0.96	0.661269	0.709255	0.730285	6.85219	6.46853	5.79062
2013	2013-09-30	273	7	1.4	1.86	0.89	0.661256	0.709243	0.730267	6.66911	6.35828	5.64483
2013	2013-09-30	273	8	1.38	1.81	1.14	0.661251	0.709234	0.730247	6.45744	6.21798	5.46763
2013	2013-09-30	273	9	1.5	2.11	1.5	0.661243	0.709227	0.730223	6.27522	6.05778	5.30737
2013	2013-09-30	273	10	1.53	2.71	1.65	0.661221	0.709218	0.730198	6.21057	5.96638	5.21836
2013	2013-09-30	273	11	1.98	2.22	1.51	0.661193	0.709204	0.730164	6.16559	5.85089	5.102
2013	2013-09-30	273	12	1.92	2.2	1.51	0.661142	0.709185	0.73013	6.50767	6.0165	5.26992
2013	2013-09-30	273	13	1.98	2.32	1.83	0.661064	0.709164	0.730103	6.81928	6.15397	5.39314
2013	2013-09-30	273	14	2.11	2.63	1.74	0.660957	0.709145	0.730074	7.21485	6.31658	5.5497
2013	2013-09-30	273	15	1.98	2.38	1.82	0.660839	0.709127	0.730045	7.55483	6.46213	5.69485
2013	2013-09-30	273	16	1.96	2.55	1.47	0.660723	0.709108	0.730007	7.83695	6.60497	5.84431
2013	2013-09-30	273	17	2.33	2.71	1.75	0.660608	0.709088	0.729965	8.05289	6.73509	5.99059
2013	2013-09-30	273	18	2.24	2.6	1.65	0.66052	0.709065	0.729926	8.16878	6.82816	6.09964
2013	2013-09-30	273	19	1.98	2.67	1.46	0.660545	0.709039	0.729931	8.24523	6.9161	6.2038
2013	2013-09-30	273	20	1.96	2.39	1.78	0.660521	0.709036	0.729958	8.25494	6.97129	6.27626
2013	2013-09-30	273	21	1.84	2.6	1.62	0.660549	0.709034	0.729965	8.25396	7.02545	6.35191
2013	2013-09-30	273	22	2.01	2.3	1.62	0.660528	0.709035	0.729961	8.23215	7.07282	6.41755
2013	2013-09-30	273	23	1.89	2.58	1.83	0.660528	0.709034	0.729961	8.17361	7.10164	6.4644
2013	2013-10-01	274	0	1.73	2.39	1.63	0.660533	0.709033	0.729966	8.11293	7.12293	6.50091
2013	2013-10-01	274	1	1.68	2.65	1.84	0.660542	0.709034	0.729967	8.05596	7.13617	6.53246
2013	2013-10-01	274	2	1.84	2.94	1.73	0.660567	0.709032	0.729968	7.98615	7.13898	6.54786
2013	2013-10-01	274	3	1.76	2	1	0.660594	0.70903	0.729973	7.88339	7.11827	6.5311
2013	2013-10-01	274	4	1.72	2	1.18	0.660608	0.709027	0.729969	7.74857	7.07986	6.47918
2013	2013-10-01	274	5	1.67	1.94	1	0.66062	0.709022	0.729961	7.6259	7.03148	6.43452
2013	2013-10-01	274	6	1.59	2.13	1.04	0.660627	0.709018	0.729954	7.4876	6.96704	6.36694
2013	2013-10-01	274	7	1.61	2.14	0.87	0.660642	0.709012	0.729952	7.32637	6.88948	6.27186
2013	2013-10-01	274	8	1.43	2	1	0.66066	0.709007	0.72994	7.12323	6.77033	6.12873
2013	2013-10-01	274	9	1.74	2.19	1.21	0.660683	0.709003	0.729928	6.92586	6.61859	5.97881
2013	2013-10-01	274	10	2	2.37	1.19	0.66072	0.709001	0.729913	6.8354	6.52512	5.89707
2013	2013-10-01	274	11	1.75	2	1.55	0.660717	0.708998	0.729894	6.6155	6.29024	5.65959
2013	2013-10-01	274	12	1.93	2	1.48	0.660662	0.708979	0.729886	6.92135	6.4585	5.83348
2013	2013-10-01	274	13	2.46	2.33	2	0.660588	0.708957	0.729889	7.29948	6.65361	5.99039
2013	2013-10-01	274	14	2.23	2.34	1.86	0.660496	0.708936	0.729877	7.83927	6.82716	6.20713
2013	2013-10-01	274	15	2	2.87	1.6	0.660422	0.708904	0.729867	8.30071	7.0013	6.40658
2013	2013-10-01	274	16	2	2.61	1.62	0.66036	0.708893	0.72989	8.39935	6.96516	6.38516
2013	2013-10-01	274	17	2.25	2.36	1.49	0.660275	0.708882	0.729889	8.54382	7.0456	6.50558
2013	2013-10-01	274	18	2.15	2	1.45	0.660166	0.708868	0.729869	8.68191	7.17482	6.66583
2013	2013-10-01	274	19	1.89	2	1.52	0.660117	0.70886	0.729865	8.67729	7.22918	6.7295
2013	2013-10-01	274	20	1.91	2.15	1.43	0.660072	0.708853	0.729864	8.64776	7.28742	6.79147
2013	2013-10-01	274	21	1.69	2.44	1.17	0.660041	0.708846	0.729859	8.54006	7.2765	6.77928
2013	2013-10-01	274	22	1.79	2.29	1.08	0.660016	0.70884	0.729848	8.39005	7.25049	6.74184
2013	2013-10-01	274	23	1.72	2	0.98	0.659996	0.708836	0.729838	8.20498	7.18246	6.66226
2013	2013-10-02	275	0	1.72	2.42	1.02	0.659983	0.708828	0.729827	8.00984	7.10433	6.56327
2013	2013-10-02	275	1	1.62	2.67	1.05	0.659976	0.70882	0.729816	7.81908	7.01716	6.45124
2013	2013-10-02	275	2	1.75	1.94	0.99	0.659972	0.708813	0.729806	7.66687	6.94453	6.3645
2013	2013-10-02	275	3	1.45	1.97	1	0.659974	0.708807	0.729797	7.50519	6.8595	6.26564
2013	2013-10-02	275	4	1.52	2	1.4	0.660057	0.708793	0.729763	7.34534	6.76546	6.16513
2013	2013-10-02	275	5	1.68	1.86	1.23	0.660222	0.708786	0.729904	7.22964	6.69579	6.0926
2013	2013-10-02	275	6	1.3	2	1.18	0.660397	0.708792	0.730118	7.14497	6.64699	6.04001
2013	2013-10-02	275	7	1.35	2.19	1.32	0.660637	0.708806	0.730336	7.07079	6.59899	5.99262
2013	2013-10-02	275	8	1.43	1.9	1.47	0.660914	0.708832	0.730585	7.0115	6.55636	5.95799
2013	2013-10-02	275	9	1.34	2.23	1.65	0.661315	0.709397	0.73123	6.97579	6.53198	5.94115
2013	2013-10-02	275	10	1.35	2.35	1.76	0.66177	0.710054	0.731528	6.97937	6.51998	5.92695
2013	2013-10-02	275	11	1.46	2	1.46	0.662303	0.710241	0.731527	7.02292	6.52768	5.93289
2013	2013-10-02	275	12	1.61	2.31	1.74	0.662814	0.710328	0.731503	7.09152	6.54114	5.94786
2013	2013-10-02	275	13	1.78	2	1.61	0.663257	0.710392	0.731474	7.22023	6.57671	5.99137
2013	2013-10-02	275	14	1.73	2.27	1.66	0.663604	0.710429	0.731453	7.43544	6.67551	6.08641
2013	2013-10-02	275	15	1.88	2.06	1.99	0.663918	0.710461	0.731476	7.61234	6.75076	6.15403
2013	2013-10-02	275	16	1.8	2.34	2	0.664229	0.710497	0.731539	7.75769	6.82306	6.21277
2013	2013-10-02	275	17	1.92	1.96	1.92	0.664482	0.710539	0.731539	7.91088	6.9117	6.3212
2013	2013-10-02	275	18	1.78	2.17	1.93	0.664667	0.710577	0.731515	8.05043	7.00217	6.43691
2013	2013-10-02	275	19	1.73	2.04	1.74	0.664797	0.710609	0.73149	8.14367	7.08261	6.53134
2013	2013-10-02	275	20	1.73	2	2.13	0.664961	0.710649	0.73154	8.17917	7.13824	6.59391
2013	2013-10-02	275	21	1	1.94	2.13	0.666132	0.711422	0.732482	8.17611	7.17384	6.63651
2013	2013-10-02	275	22	0.77	1.63	2.56	0.673336	0.712478	0.733462	8.16675	7.20848	6.67993
2013	2013-10-02	275	23	0.62	1.92	1.98	0.687404	0.712947	0.734362	8.1539	7.24062	6.72772
2013	2013-10-03	276	0	0.3	1.77	2.13	0.698407	0.713102	0.73532	8.09511	7.23296	6.74339
2013	2013-10-03	276	1	0.96	2	2.33	0.694859	0.712867	0.735437	8.08797	7.25489	6.79284
2013	2013-10-03	276	2	1.22	1.92	2	0.689344	0.712666	0.735215	8.09897	7.28456	6.84846
2013	2013-10-03	276	3	1.97	2.09	2	0.686248	0.712545	0.734995	8.11169	7.31507	6.90123
2013	2013-10-03	276	4	1.22	2.14	2	0.684134	0.712475	0.734861	8.12078	7.34147	6.94698
2013	2013-10-03	276	5	1.29	2	2	0.683335	0.712534	0.734929	8.14287	7.37701	6.99753
2013	2013-10-03	276	6	1.69	2	2.06	0.682633	0.712537	0.734923	8.17055	7.41722	7.05176
2013	2013-10-03	276	7	1.28	1.94	2	0.682132	0.712531	0.734903	8.18109	7.44469	7.09231
2013	2013-10-03	276	8	0.99	2.36	2.69	0.68282	0.712689	0.735149	8.18368	7.46286	7.12264
2013	2013-10-03	276	9	0.99	2.27	2.93	0.685805	0.71278	0.735381	8.20427	7.48729	7.15856
2013	2013-10-03	276	10	1.27	3.05	3.19	0.685975	0.712725	0.735293	8.23371	7.49678	7.18266
2013	2013-10-03	276	11	1.5	2.25	2	0.684794	0.712655	0.73516	8.33957	7.54261	7.23578
2013	2013-10-03	276	12	1.33	2.6	2.68	0.684387	0.712733	0.735229	8.51426	7.63655	7.32369
2013	2013-10-03	276	13	1.21	2.42	2.13	0.685639	0.712872	0.735489	8.65736	7.7039	7.38383
2013	2013-10-03	276	14	1.48	2.39	2.68	0.685995	0.71283	0.735488	8.8491	7.79566	7.48189
2013	2013-10-03	276	15	1.68	2.33	2.02	0.684877	0.712732	0.735319	9.04444	7.90889	7.59179
2013	2013-10-03	276	16	1.82	2.15	2.46	0.683683	0.712659	0.735173	9.19157	7.9852	7.67302
2013	2013-10-03	276	17	1.84	3.11	2.25	0.682601	0.712603	0.735052	9.38523	8.09368	7.80033
2013	2013-10-03	276	18	1.87	2.35	2.72	0.681546	0.712559	0.73493	9.52848	8.19207	7.91534
2013	2013-10-03	276	19	1.87	3.27	2	0.680702	0.71252	0.734818	9.63834	8.2927	8.01961
2013	2013-10-03	276	20	1.78	2	2.76	0.6799	0.712493	0.734703	9.65856	8.34907	8.07863
2013	2013-10-03	276	21	1.96	2.67	3.66	0.679145	0.712464	0.734592	9.63317	8.37714	8.11506
2013	2013-10-03	276	22	1.89	2.46	2.74	0.678508	0.712437	0.734486	9.6092	8.40681	8.1508
2013	2013-10-03	276	23	2	2.34	2.93	0.677957	0.712409	0.734391	9.57302	8.42766	8.17625
2013	2013-10-04	277	0	2.31	2	2	0.6775	0.712383	0.734312	9.52394	8.434	8.19065
2013	2013-10-04	277	1	2	2	3.16	0.677082	0.71236	0.734235	9.47497	8.43344	8.19987
2013	2013-10-04	277	2	2.42	2.19	3.22	0.676721	0.712341	0.734161	9.43189	8.43503	8.20965
2013	2013-10-04	277	3	2.15	2	3.03	0.676414	0.712323	0.73409	9.39657	8.43743	8.22025
2013	2013-10-04	277	4	2.06	2	2.7	0.676131	0.712307	0.734021	9.35995	8.43669	8.22647
2013	2013-10-04	277	5	1.96	3	3.21	0.675763	0.712291	0.733951	9.32407	8.431	8.2307
2013	2013-10-04	277	6	2.15	2.69	4	0.675462	0.712276	0.73389	9.29782	8.43168	8.23851
2013	2013-10-04	277	7	2.09	3.23	2.58	0.675211	0.712264	0.733834	9.2683	8.42838	8.24259
2013	2013-10-04	277	8	1.9	2	3.54	0.674989	0.712248	0.733777	9.23	8.41663	8.23865
2013	2013-10-04	277	9	1.89	2.29	3.8	0.674772	0.712234	0.733725	9.21029	8.41034	8.24177
2013	2013-10-04	277	10	1.86	2.71	2.9	0.674588	0.712229	0.733705	9.19628	8.40229	8.24058
2013	2013-10-04	277	11	1.94	2.33	3.28	0.674409	0.71223	0.733693	9.18601	8.38528	8.2298
2013	2013-10-04	277	12	2.13	2.52	3.49	0.674217	0.712228	0.733669	9.17086	8.34062	8.18395
2013	2013-10-04	277	13	2.29	2.57	2.84	0.674038	0.712218	0.733658	9.36723	8.43024	8.2646
2013	2013-10-04	277	14	2.15	2.74	2.71	0.673848	0.712202	0.733625	9.68306	8.57253	8.39823
2013	2013-10-04	277	15	2.19	2.51	2.62	0.673625	0.712192	0.733592	9.85982	8.63881	8.45509
2013	2013-10-04	277	16	2.07	2.45	2.74	0.673392	0.712188	0.733556	9.92714	8.66812	8.47173
2013	2013-10-04	277	17	2.06	2.36	3.1	0.733344	0.712179	0.733525	10.0106	8.72546	8.51993
2013	2013-10-04	277	18	2.14	2.46	3.21	0.765068	0.712168	0.733492	10.0839	8.7737	8.56846
2013	2013-10-04	277	19	2.49	2.61	2.42	0.763684	0.712156	0.733455	10.1895	8.88893	8.66122
2013	2013-10-04	277	20	2.24	2.76	1.98	0.763411	0.712147	0.733418	10.1845	8.95253	8.70728
2013	2013-10-04	277	21	1.99	2.39	2.77	0.764097	0.71214	0.73338	10.0839	8.94161	8.69128
2013	2013-10-04	277	22	1.96	2.15	1.78	0.686783	0.712132	0.733343	9.94352	8.90575	8.6395
2013	2013-10-04	277	23	1.82	2.5	1.77	0.671997	0.712112	0.73329	9.76333	8.83851	8.55628
2013	2013-10-05	278	0	1.69	2.3	1.27	0.67186	0.712091	0.733242	9.56433	8.74923	8.44838
2013	2013-10-05	278	1	1.69	2.34	1.35	0.671734	0.711986	0.733207	9.35894	8.64489	8.32826
2013	2013-10-05	278	2	1.82	2.07	1.48	0.671621	0.71195	0.733177	9.14249	8.52598	8.18727
2013	2013-10-05	278	3	1.82	2.08	1.11	0.671524	0.711936	0.733145	8.90645	8.38262	8.01662
2013	2013-10-05	278	4	1.53	1.94	1.17	0.671436	0.71192	0.733107	8.70252	8.26119	7.86906
2013	2013-10-05	278	5	1.6	1.94	0.98	0.671343	0.711905	0.733073	8.47906	8.11648	7.69543
2013	2013-10-05	278	6	1.6	2.07	0.94	0.671268	0.71189	0.733034	8.27259	7.97997	7.53354
2013	2013-10-05	278	7	1.53	2.2	1.03	0.67119	0.711877	0.732996	8.04093	7.82356	7.33866
2013	2013-10-05	278	8	1.43	2.08	1.14	0.6711	0.711862	0.732961	7.80279	7.63934	7.13422
2013	2013-10-05	278	9	1.53	2.02	1.76	0.671034	0.711852	0.732933	7.55969	7.42736	6.92542
2013	2013-10-05	278	10	1.72	2.01	2.22	0.670981	0.711843	0.7329	7.34105	7.19932	6.72899
2013	2013-10-05	278	11	1.76	2.62	2.37	0.670917	0.711835	0.732861	7.3898	7.17096	6.68261
2013	2013-10-05	278	12	2.13	2.57	2.6	0.670807	0.711822	0.732831	7.5581	7.19226	6.70265
2013	2013-10-05	278	13	2.19	2.39	2.27	0.670657	0.711802	0.732799	7.78374	7.29893	6.76965
2013	2013-10-05	278	14	2.01	2.47	2.86	0.670497	0.71178	0.732813	8.22135	7.46073	6.91558
2013	2013-10-05	278	15	2.14	2.35	3.13	0.670335	0.71176	0.732789	8.61985	7.59631	7.04101
2013	2013-10-05	278	16	2.23	2.2	2.74	0.670148	0.711744	0.732776	8.87898	7.64755	7.06682
2013	2013-10-05	278	17	2.16	2.56	2.82	0.669963	0.711722	0.73275	9.14514	7.77703	7.2627
2013	2013-10-05	278	18	2.19	5.78	2.66	0.669776	0.711701	0.732715	9.42176	7.95146	7.47522
2013	2013-10-05	278	19	2.39	2.97	3.66	0.6696	0.711695	0.732685	9.57653	8.0818	7.61612
2013	2013-10-05	278	20	2.08	2.75	3.15	0.669453	0.711693	0.73266	9.62369	8.16991	7.70196
2013	2013-10-05	278	21	2.23	2.89	2.06	0.669319	0.711689	0.732633	9.57103	8.20939	7.74275
2013	2013-10-05	278	22	1.96	3.01	2.54	0.669209	0.711684	0.732594	9.45239	8.19684	7.73737
2013	2013-10-05	278	23	1.86	2.27	2.04	0.669104	0.711681	0.732577	9.35348	8.19297	7.73798
2013	2013-10-06	279	0	1.79	2.79	1.74	0.66901	0.711675	0.732565	9.2256	8.16266	7.70867
2013	2013-10-06	279	1	1.93	2.86	1.65	0.668931	0.711666	0.732542	9.08186	8.12084	7.66632
2013	2013-10-06	279	2	1.96	2.93	1.62	0.668851	0.711661	0.732526	8.95351	8.09061	7.62872
2013	2013-10-06	279	3	1.71	2.23	1.36	0.668771	0.711655	0.732512	8.80699	8.03696	7.57273
2013	2013-10-06	279	4	1.73	2.12	1.32	0.668702	0.711647	0.732485	8.6637	7.98122	7.51435
2013	2013-10-06	279	5	1.77	2.03	1.15	0.668637	0.71164	0.732464	8.48821	7.90038	7.41941
2013	2013-10-06	279	6	1.71	2.65	1.32	0.668581	0.711631	0.732446	8.28918	7.79342	7.29785
2013	2013-10-06	279	7	1.72	2.31	1.2	0.668544	0.711622	0.73242	8.11191	7.69302	7.18663
2013	2013-10-06	279	8	1.7	1.97	1.44	0.668497	0.711614	0.732389	7.91951	7.5547	7.05438
2013	2013-10-06	279	9	1.63	2.46	1.72	0.668465	0.711607	0.732357	7.72234	7.39077	6.91102
2013	2013-10-06	279	10	1.88	2.22	2.08	0.668424	0.711602	0.732331	7.53678	7.21191	6.76665
2013	2013-10-06	279	11	1.91	2.15	2	0.668358	0.711589	0.732308	7.20393	6.86848	6.41339
2013	2013-10-06	279	12	2	2.27	2.9	0.668235	0.711565	0.732295	7.7084	7.22506	6.72635
2013	2013-10-06	279	13	2.71	2.5	2.73	0.668095	0.711519	0.732248	8.1423	7.39828	6.92038
2013	2013-10-06	279	14	2.37	2.54	2.77	0.667959	0.71148	0.732223	8.75002	7.54928	7.07958
2013	2013-10-06	279	15	2.5	2.77	3.79	0.667785	0.711455	0.732185	9.26151	7.7127	7.23219
2013	2013-10-06	279	16	2.49	2.7	3.68	0.667603	0.711426	0.732181	9.67828	7.86147	7.39595
2013	2013-10-06	279	17	2.3	2.92	3.84	0.696889	0.711401	0.732149	9.96463	7.99926	7.65439
2013	2013-10-06	279	18	2.22	3.12	2.87	0.755372	0.711388	0.732117	10.1342	8.13352	7.85185
2013	2013-10-06	279	19	2.42	3.18	2.58	0.754285	0.71138	0.732083	10.2235	8.25392	7.99224
2013	2013-10-06	279	20	2.95	3.34	2.61	0.754056	0.711373	0.73207	10.2263	8.34138	8.08532
2013	2013-10-06	279	21	2.05	3.58	2.29	0.754784	0.711367	0.732068	10.1287	8.37179	8.11954
2013	2013-10-06	279	22	1.93	2.44	1.9	0.711251	0.711362	0.73204	9.99744	8.36925	8.11678
2013	2013-10-06	279	23	1.94	2.36	1.83	0.666663	0.711357	0.731987	9.84216	8.34814	8.0797
2013	2013-10-07	280	0	1.79	2.59	1.41	0.66659	0.711349	0.731971	9.67383	8.30525	8.0299
2013	2013-10-07	280	1	1.81	2.24	1.39	0.666524	0.71134	0.731955	9.47463	8.24113	7.94272
2013	2013-10-07	280	2	1.73	2.27	1.41	0.666463	0.711331	0.731935	9.26011	8.15019	7.83065
2013	2013-10-07	280	3	1.84	2.4	1.22	0.66641	0.711323	0.731917	9.06923	8.06793	7.73018
2013	2013-10-07	280	4	2.04	2.36	1.29	0.666366	0.71131	0.731899	8.86718	7.97133	7.60915
2013	2013-10-07	280	5	1.64	2.49	1.25	0.666324	0.711302	0.731875	8.69399	7.88511	7.50869
2013	2013-10-07	280	6	1.73	2.53	1.16	0.666287	0.711289	0.731873	8.49307	7.77781	7.37394
2013	2013-10-07	280	7	2.01	2.27	1.07	0.666262	0.711279	0.731881	8.2851	7.65784	7.22631
2013	2013-10-07	280	8	1.9	2.24	1.3	0.666244	0.711269	0.731867	8.05922	7.50381	7.05305
2013	2013-10-07	280	9	1.63	2.24	1.57	0.666231	0.71126	0.731833	7.82392	7.30967	6.87012
2013	2013-10-07	280	10	1.98	2.48	2.17	0.666215	0.71125	0.731797	7.60779	7.10403	6.6914
2013	2013-10-07	280	11	1.94	2.45	2.35	0.666178	0.711239	0.731767	7.33748	6.81045	6.36977
2013	2013-10-07	280	12	2.07	2.45	2.2	0.666082	0.711215	0.731733	7.86872	7.11999	6.69396
2013	2013-10-07	280	13	2.59	2.4	2.91	0.665965	0.711188	0.731695	8.31789	7.36282	6.90348
2013	2013-10-07	280	14	2.48	2.52	3.18	0.665852	0.711165	0.731666	8.78536	7.50117	7.05812
2013	2013-10-07	280	15	2.52	2.76	2.89	0.665716	0.711142	0.731626	9.16328	7.61722	7.17501
2013	2013-10-07	280	16	2.43	2.72	2.58	0.665563	0.711111	0.731621	9.55934	7.80164	7.34327
2013	2013-10-07	280	17	2.46	2.56	2.73	0.665402	0.711084	0.731592	9.84406	7.94536	7.51702
2013	2013-10-07	280	18	2.29	2.66	2.63	0.725449	0.71107	0.731562	10.0244	8.07212	7.66104
2013	2013-10-07	280	19	2.48	3.06	3.16	0.752155	0.71106	0.731536	10.114	8.18312	7.78161
2013	2013-10-07	280	20	2.17	2.93	3.01	0.75205	0.711057	0.731519	10.1074	8.2428	7.84781
2013	2013-10-07	280	21	2.33	3.02	2.78	0.752468	0.711054	0.7315	10.0474	8.27011	7.88639
2013	2013-10-07	280	22	2.27	2.97	2.47	0.685481	0.711051	0.731479	9.97981	8.29374	7.9193
2013	2013-10-07	280	23	2.31	3.32	2.25	0.664785	0.711045	0.731455	9.90742	8.31232	7.94725
2013	2013-10-08	281	0	2.25	2.9	2.35	0.664707	0.711037	0.731439	9.83262	8.33392	7.97347
2013	2013-10-08	281	1	2.5	2.81	2.69	0.664636	0.71103	0.73142	9.72575	8.32778	7.97482
2013	2013-10-08	281	2	2.14	3.15	2.51	0.664582	0.711017	0.731403	9.63921	8.31519	7.97275
2013	2013-10-08	281	3	2.15	3.06	2.37	0.664553	0.710996	0.731397	9.56959	8.31405	7.97839
2013	2013-10-08	281	4	2.6	2.47	2.39	0.664578	0.710982	0.73142	9.49401	8.29669	7.96681
2013	2013-10-08	281	5	1.71	2.55	2.26	0.664767	0.710995	0.731714	9.41834	8.27619	7.95365
2013	2013-10-08	281	6	0.65	2.23	2.35	0.668522	0.711652	0.733055	9.3643	8.26169	7.94928
2013	2013-10-08	281	7	0.86	2.04	2.7	0.680515	0.712622	0.733802	9.31346	8.25641	7.95612
2013	2013-10-08	281	8	1.16	2.44	2.68	0.685376	0.712979	0.734308	9.28143	8.26225	7.97594
2013	2013-10-08	281	9	1.86	2.76	3.5	0.684329	0.712958	0.734564	9.24582	8.25622	7.98516
2013	2013-10-08	281	10	1.72	2.72	3.07	0.682729	0.712874	0.734636	9.23696	8.25396	7.99448
2013	2013-10-08	281	11	1.8	2.42	2.92	0.681529	0.71281	0.734635	9.10643	8.11278	7.85814
2013	2013-10-08	281	12	1.89	3.06	3.13	0.680391	0.712776	0.734598	9.42389	8.31553	8.05183
2013	2013-10-08	281	13	2.03	2.77	3.03	0.679335	0.712728	0.734548	9.64238	8.40775	8.13246
2013	2013-10-08	281	14	2.02	3.01	2.83	0.705081	0.712678	0.734493	9.91901	8.54111	8.24971
2013	2013-10-08	281	15	1.75	2.73	3.32	0.772856	0.712661	0.734569	10.1261	8.63618	8.33618
2013	2013-10-08	281	16	2.06	2.49	2.97	0.771943	0.712744	0.734695	10.2147	8.67295	8.36938
2013	2013-10-08	281	17	2.09	2.41	3.03	0.770453	0.712774	0.734674	10.3214	8.74766	8.43355
2013	2013-10-08	281	18	2.03	2.64	2.75	0.768792	0.712748	0.734622	10.4038	8.81572	8.49643
2013	2013-10-08	281	19	2.29	2.37	2.43	0.767464	0.712714	0.734548	10.4501	8.88207	8.55478
2013	2013-10-08	281	20	1.94	2.43	2.56	0.767307	0.712682	0.734537	10.4085	8.9086	8.57812
2013	2013-10-08	281	21	1.57	2.18	2.36	0.767807	0.712665	0.73454	10.3365	8.92086	8.58589
2013	2013-10-08	281	22	1.96	2.4	2.33	0.769004	0.712655	0.734526	10.2025	8.86943	8.54897
2013	2013-10-08	281	23	1.92	2.45	2.16	0.770012	0.712642	0.734478	10.0742	8.82996	8.51312
2013	2013-10-09	282	0	1.8	2.3	2.23	0.691211	0.712627	0.73442	9.98293	8.81391	8.49365
2013	2013-10-09	282	1	1.87	2.52	2.09	0.675445	0.712611	0.734363	9.87951	8.79116	8.46053
2013	2013-10-09	282	2	1.73	2.67	1.8	0.675173	0.712597	0.734316	9.757	8.7565	8.42095
2013	2013-10-09	282	3	1.92	2.33	1.64	0.674891	0.71258	0.734243	9.6193	8.70228	8.36736
2013	2013-10-09	282	4	1.66	2.12	1.4	0.674627	0.712562	0.734192	9.49534	8.65293	8.32172
2013	2013-10-09	282	5	1.56	2.08	1.19	0.674374	0.712533	0.734139	9.33096	8.57728	8.23168
2013	2013-10-09	282	6	1.66	2.31	1.13	0.674133	0.712506	0.734058	9.13296	8.4696	8.10972
2013	2013-10-09	282	7	1.61	2.24	1.29	0.673966	0.712493	0.734057	8.90864	8.3296	7.9518
2013	2013-10-09	282	8	1.48	2.17	1.63	0.673898	0.712483	0.734099	8.72473	8.19158	7.80873
2013	2013-10-09	282	9	1.76	2.27	1.97	0.673874	0.712507	0.734119	8.53958	8.02548	7.65859
2013	2013-10-09	282	10	1.74	2.43	2.19	0.673839	0.712552	0.73413	8.49245	7.94469	7.5768
2013	2013-10-09	282	11	1.94	2.68	2.22	0.673754	0.712564	0.734123	8.56224	7.93294	7.54947
2013	2013-10-09	282	12	2.16	2.58	2.05	0.673621	0.712555	0.734118	8.74855	7.99813	7.61153
2013	2013-10-09	282	13	2.15	2.5	2.16	0.673439	0.712539	0.734119	9.02682	8.12232	7.73242
2013	2013-10-09	282	14	2.17	2.53	2.04	0.673241	0.712526	0.734101	9.23593	8.19839	7.80199
2013	2013-10-09	282	15	2.21	2.63	1.98	0.67309	0.712521	0.734106	9.4062	8.2702	7.87038
2013	2013-10-09	282	16	1.69	2.5	1.9	0.673111	0.712538	0.73426	9.54943	8.34899	7.942
2013	2013-10-09	282	17	1.33	2.25	1.83	0.673524	0.71274	0.734612	9.62691	8.4046	7.99472
2013	2013-10-09	282	18	1.23	2.13	1.89	0.676235	0.713172	0.735337	9.65035	8.44188	8.03319
2013	2013-10-09	282	19	0.97	2.13	1.93	0.681973	0.713338	0.735714	9.64576	8.46794	8.06738
2013	2013-10-09	282	20	0.92	2.62	1.9	0.68584	0.713417	0.735904	9.61784	8.4836	8.0949
2013	2013-10-09	282	21	0.78	2.32	1.85	0.690287	0.713504	0.736106	9.57856	8.49336	8.12124
2013	2013-10-09	282	22	0.86	2.36	1.94	0.694149	0.713506	0.736102	9.54456	8.50238	8.15097
2013	2013-10-09	282	23	1.02	2.33	1.99	0.695805	0.71351	0.736099	9.52597	8.51848	8.19054
2013	2013-10-10	283	0	0.68	2.33	1.83	0.700938	0.71364	0.7363	9.52034	8.54326	8.23558
2013	2013-10-10	283	1	1.12	2.63	2.26	0.701431	0.713529	0.736215	9.53115	8.57376	8.29565
2013	2013-10-10	283	2	1.51	2.37	2.39	0.695703	0.713349	0.735929	9.5495	8.61215	8.35745
2013	2013-10-10	283	3	1.73	2.52	2.37	0.692757	0.713289	0.735747	9.55313	8.63823	8.40342
2013	2013-10-10	283	4	1.54	2.68	3.01	0.691096	0.713266	0.735617	9.55123	8.66026	8.43994
2013	2013-10-10	283	5	1.42	3.37	2.43	0.689747	0.71327	0.73554	9.55259	8.68144	8.47373
2013	2013-10-10	283	6	2.02	3.38	2.44	0.688759	0.713228	0.735438	9.55127	8.69877	8.50141
2013	2013-10-10	283	7	1.89	2.78	2.71	0.687801	0.713176	0.735343	9.53031	8.69675	8.51393
2013	2013-10-10	283	8	1.64	2.56	2.84	0.686815	0.713128	0.735234	9.49651	8.67505	8.51522
2013	2013-10-10	283	9	1.7	4.04	2.82	0.685881	0.713081	0.735133	9.50038	8.66954	8.5284
2013	2013-10-10	283	10	1.82	2.81	2.99	0.68504	0.713039	0.735039	9.54807	8.68004	8.55167
2013	2013-10-10	283	11	1.89	2.35	2.68	0.684112	0.713006	0.734953	9.63399	8.70881	8.5849
2013	2013-10-10	283	12	2.11	2.33	2.72	0.68346	0.712978	0.734879	9.724	8.73165	8.60509
2013	2013-10-10	283	13	2.17	2.35	2.5	0.682761	0.712949	0.734827	9.84316	8.75576	8.62522
2013	2013-10-10	283	14	2.14	3.11	2.51	0.763623	0.71292	0.734786	10.1104	8.8628	8.72867
2013	2013-10-10	283	15	2.12	2.77	2.5	0.775977	0.712894	0.7347	10.3366	8.96178	8.80269
2013	2013-10-10	283	16	2.18	2.61	2.56	0.773803	0.712867	0.734607	10.4631	9.01894	8.84329
2013	2013-10-10	283	17	2.21	2.57	4.88	0.771843	0.712841	0.734519	10.5807	9.08907	8.8966
2013	2013-10-10	283	18	2.18	2.52	4.53	0.769753	0.712819	0.734435	10.7134	9.17057	8.96877
2013	2013-10-10	283	19	2.24	2.6	3.11	0.767721	0.712788	0.734341	10.8432	9.28152	9.06243
2013	2013-10-10	283	20	2.01	2.61	2.39	0.766778	0.712766	0.734264	10.8779	9.3474	9.11792
2013	2013-10-10	283	21	1.93	2.85	2.35	0.766778	0.712749	0.734204	10.8115	9.36965	9.13576
2013	2013-10-10	283	22	1.97	2.66	2.06	0.767248	0.712726	0.73415	10.6985	9.34887	9.12038
2013	2013-10-10	283	23	2.01	2.38	1.7	0.767851	0.712702	0.734093	10.5551	9.30516	9.07531
2013	2013-10-11	284	0	1.84	2.46	1.36	0.768895	0.712679	0.734039	10.39	9.24826	9.0168
2013	2013-10-11	284	1	1.94	2.26	1.29	0.770359	0.712656	0.733987	10.1951	9.16242	8.92249
2013	2013-10-11	284	2	1.75	2.38	1.27	0.726877	0.712636	0.733933	10.0022	9.06729	8.82023
2013	2013-10-11	284	3	1.66	2.27	1.12	0.676258	0.712615	0.733876	9.8214	8.97283	8.72136
2013	2013-10-11	284	4	1.67	2.54	1.14	0.675926	0.71259	0.733819	9.62184	8.86197	8.60095
2013	2013-10-11	284	5	1.62	2.49	1.15	0.675623	0.712555	0.733785	9.3959	8.71955	8.44688
2013	2013-10-11	284	6	1.67	2.49	1.47	0.675364	0.712535	0.733744	9.21344	8.60106	8.31319
2013	2013-10-11	284	7	1.9	2.31	1.38	0.675136	0.712516	0.733692	9.07348	8.51372	8.20754
2013	2013-10-11	284	8	1.71	2.08	1.55	0.674938	0.712501	0.73363	8.87491	8.35461	8.05636
2013	2013-10-11	284	9	1.78	2.37	2.23	0.674784	0.712488	0.733571	8.70263	8.19364	7.9162
2013	2013-10-11	284	10	1.93	2.64	2.38	0.674622	0.712477	0.733523	8.67826	8.12742	7.85479
2013	2013-10-11	284	11	2.06	2.78	2.44	0.674418	0.712464	0.733485	8.81658	8.15792	7.88385
2013	2013-10-11	284	12	2.2	3.94	2.52	0.674197	0.712445	0.733449	8.90141	8.09963	7.82653
2013	2013-10-11	284	13	2.72	2.82	2.35	0.673936	0.712421	0.733419	9.16392	8.21877	7.8834
2013	2013-10-11	284	14	2.65	2.92	2.96	0.673637	0.712403	0.733395	9.69507	8.38139	8.03524
2013	2013-10-11	284	15	2.84	3.2	2.95	0.758844	0.712382	0.733345	10.2413	8.54969	8.16887
2013	2013-10-11	284	16	2.6	2.83	2.8	0.758552	0.712362	0.733371	10.7633	8.66641	8.26385
2013	2013-10-11	284	17	2.41	2.65	2.65	0.754597	0.712349	0.733339	11.1154	8.78804	8.49162
2013	2013-10-11	284	18	2.41	3.17	2.98	0.752417	0.712334	0.733302	11.2891	8.90081	8.66677
2013	2013-10-11	284	19	2.35	2.88	2.87	0.75141	0.712323	0.733275	11.3503	9.00059	8.79099
2013	2013-10-11	284	20	2.15	2.88	2.16	0.751519	0.712316	0.733239	11.3006	9.05948	8.86508
2013	2013-10-11	284	21	2.18	2.49	2.35	0.752521	0.712313	0.733215	11.1626	9.0538	8.86975
2013	2013-10-11	284	22	2.04	2.45	2.07	0.75368	0.712306	0.7332	11.0143	9.04563	8.8614
2013	2013-10-11	284	23	2.05	2.41	1.69	0.754946	0.712301	0.733173	10.8536	9.02254	8.83111
2013	2013-10-12	285	0	1.93	2.43	1.76	0.756446	0.712294	0.733148	10.6703	8.98044	8.78394
2013	2013-10-12	285	1	1.85	2.43	1.55	0.758173	0.712284	0.733115	10.4685	8.91884	8.7109
2013	2013-10-12	285	2	1.71	2.47	1.47	0.759906	0.712275	0.733088	10.2686	8.84967	8.62959
2013	2013-10-12	285	3	1.81	2.48	1.35	0.748876	0.712263	0.733067	10.0705	8.77419	8.54109
2013	2013-10-12	285	4	1.54	2.22	1.14	0.670621	0.712251	0.733034	9.87479	8.68431	8.44762
2013	2013-10-12	285	5	1.58	2.41	1.09	0.670524	0.712239	0.73301	9.66434	8.58389	8.32945
2013	2013-10-12	285	6	1.54	2.67	1.04	0.670458	0.712226	0.732985	9.43977	8.46098	8.18806
2013	2013-10-12	285	7	1.61	2.42	1.09	0.670367	0.712215	0.732962	9.1876	8.31934	8.01046
2013	2013-10-12	285	8	1.51	2.4	1.41	0.67029	0.712203	0.73294	8.95941	8.16141	7.83621
2013	2013-10-12	285	9	1.67	2.29	1.9	0.670216	0.712193	0.732939	8.73491	7.98089	7.66278
2013	2013-10-12	285	10	1.72	2.32	2.14	0.670131	0.712185	0.732911	8.43167	7.702	7.39834
2013	2013-10-12	285	11	1.9	2.53	1.97	0.670017	0.71216	0.732865	8.20584	7.45662	7.13831
2013	2013-10-12	285	12	1.92	2.57	2.63	0.669872	0.712119	0.732837	8.68922	7.773	7.44198
2013	2013-10-12	285	13	2.24	2.55	2.74	0.669728	0.712082	0.732802	9.08965	7.97114	7.58735
2013	2013-10-12	285	14	2.23	2.63	3.37	0.669563	0.712055	0.732765	9.67942	8.07888	7.74955
2013	2013-10-12	285	15	2.3	2.77	2.85	0.748571	0.712034	0.732716	10.2026	8.23731	7.88354
2013	2013-10-12	285	16	2.37	3.08	3.18	0.752725	0.712004	0.732724	10.7407	8.35653	7.98638
2013	2013-10-12	285	17	2.42	3.65	3.24	0.748734	0.711976	0.732698	11.1242	8.50055	8.23488
2013	2013-10-12	285	18	2.39	3.42	3.07	0.746503	0.711964	0.732667	11.326	8.64246	8.44054
2013	2013-10-12	285	19	2.31	3.36	4.65	0.745446	0.711956	0.732631	11.4082	8.76454	8.59851
2013	2013-10-12	285	20	2.3	3.24	2.91	0.745385	0.711952	0.732584	11.3897	8.8477	8.70076
2013	2013-10-12	285	21	2.3	2.88	3.2	0.746338	0.711947	0.732548	11.2656	8.86936	8.73546
2013	2013-10-12	285	22	2.34	2.99	2.47	0.74761	0.711942	0.732522	11.1114	8.85976	8.73933
2013	2013-10-12	285	23	2.23	3.11	4.06	0.748757	0.71194	0.732501	10.9717	8.84917	8.7368
2013	2013-10-13	286	0	2.12	4.18	2.81	0.74963	0.711936	0.732484	10.8623	8.84747	8.74071
2013	2013-10-13	286	1	2.26	3.2	3.34	0.750165	0.711933	0.73248	10.7901	8.86818	8.75916
2013	2013-10-13	286	2	2.28	3.58	3.79	0.751133	0.71193	0.732464	10.674	8.84739	8.74325
2013	2013-10-13	286	3	2.64	4.09	3.55	0.752031	0.711928	0.732445	10.5658	8.83132	8.72998
2013	2013-10-13	286	4	2.32	3.54	3.17	0.752663	0.711924	0.732429	10.4876	8.82936	8.72816
2013	2013-10-13	286	5	2.29	3.34	3.54	0.753297	0.711922	0.732416	10.4079	8.82061	8.71998
2013	2013-10-13	286	6	2.71	3.59	3.68	0.75394	0.71192	0.732401	10.3276	8.80718	8.70867
2013	2013-10-13	286	7	2.27	3.83	2.92	0.754515	0.711916	0.732385	10.2552	8.79098	8.69524
2013	2013-10-13	286	8	2.22	3.21	3.29	0.755025	0.711907	0.732375	10.1945	8.76794	8.67692
2013	2013-10-13	286	9	2.25	3.26	2.75	0.755416	0.711906	0.732367	10.144	8.74391	8.65762
2013	2013-10-13	286	10	2.36	2.94	2.77	0.75527	0.711907	0.732351	10.1518	8.74915	8.65724
2013	2013-10-13	286	11	2.42	3.28	2.7	0.755076	0.711904	0.732325	10.1589	8.72556	8.6231
2013	2013-10-13	286	12	2.46	3	2.61	0.753536	0.711878	0.73229	10.3093	8.78615	8.67158
2013	2013-10-13	286	13	2.39	3.27	2.65	0.750215	0.711848	0.732265	10.6436	8.97743	8.84908
2013	2013-10-13	286	14	2.42	3.29	2.49	0.747818	0.711834	0.732219	10.8789	9.08884	8.95658
2013	2013-10-13	286	15	2.43	3.98	2.24	0.745942	0.711823	0.732184	11.0587	9.19451	9.05318
2013	2013-10-13	286	16	2.49	3	2.35	0.744998	0.711806	0.732156	11.1442	9.27235	9.12441
2013	2013-10-13	286	17	2.38	3.42	2.21	0.74465	0.711786	0.73214	11.1745	9.32401	9.1736
2013	2013-10-13	286	18	1.79	3.32	2.47	0.744813	0.711783	0.732187	11.1665	9.35619	9.20849
2013	2013-10-13	286	19	2.02	3.19	2.64	0.745383	0.711797	0.732394	11.1379	9.38279	9.24002
2013	2013-10-13	286	20	1.94	2.74	2.54	0.746301	0.711828	0.732643	11.0965	9.40215	9.26712
2013	2013-10-13	286	21	1.37	2.76	2.6	0.749765	0.71234	0.733296	11.0555	9.42154	9.29778
2013	2013-10-13	286	22	1.44	2.68	2.76	0.764329	0.712834	0.733931	11.0199	9.44154	9.33166
2013	2013-10-13	286	23	0.98	2.59	2.42	0.775429	0.713343	0.734626	10.9914	9.46351	9.37331
2013	2013-10-14	287	0	1.1	2.68	2.89	0.783753	0.713582	0.735406	10.9693	9.48981	9.41993
2013	2013-10-14	287	1	1.03	2.54	2.79	0.785255	0.713589	0.735574	10.944	9.51265	9.46446
2013	2013-10-14	287	2	1.26	2.77	2.97	0.785584	0.713577	0.735627	10.9222	9.53592	9.50483
2013	2013-10-14	287	3	1.64	2.94	3.5	0.783421	0.713525	0.735552	10.8988	9.55586	9.53838
2013	2013-10-14	287	4	1.85	2.93	3.36	0.780126	0.713416	0.735425	10.8744	9.57086	9.56421
2013	2013-10-14	287	5	2.04	2.97	4.09	0.777028	0.713331	0.735265	10.8523	9.58268	9.58364
2013	2013-10-14	287	6	2.16	3.74	3.72	0.774668	0.713267	0.735136	10.8288	9.58997	9.59499
2013	2013-10-14	287	7	1.89	3.46	3.36	0.773017	0.713215	0.735002	10.8041	9.59328	9.60552
2013	2013-10-14	287	8	2.2	3.68	3.23	0.771731	0.713168	0.734883	10.7788	9.58991	9.61279
2013	2013-10-14	287	9	2.15	2.84	3.34	0.770777	0.713134	0.734788	10.7631	9.58527	9.6158
2013	2013-10-14	287	10	2.23	2.79	2.89	0.769842	0.713106	0.734716	10.7893	9.59673	9.63366
2013	2013-10-14	287	11	2.43	3	3.22	0.768721	0.713086	0.73465	10.8318	9.59447	9.64077
2013	2013-10-14	287	12	2.56	3.1	3.08	0.766334	0.71307	0.734614	10.9974	9.67299	9.71953
2013	2013-10-14	287	13	2.42	3.21	2.88	0.763627	0.713054	0.734563	11.2012	9.77236	9.81277
2013	2013-10-14	287	14	2.45	3.14	3.06	0.761962	0.713041	0.734552	11.3023	9.81759	9.85441
2013	2013-10-14	287	15	2.42	2.76	2.81	0.760292	0.713031	0.734544	11.4169	9.88696	9.9213
2013	2013-10-14	287	16	1.41	2.68	3.18	0.759966	0.713075	0.736247	11.5163	9.9459	9.97991
2013	2013-10-14	287	17	1.81	2.97	2.92	0.763416	0.726624	0.742677	11.5993	10.0058	10.0419
2013	2013-10-14	287	18	2.06	3.27	2.99	0.764301	0.734661	0.742709	11.6419	10.051	10.0928
2013	2013-10-14	287	19	1.55	2.61	2.95	0.764278	0.734655	0.742707	11.6539	10.0856	10.1344
2013	2013-10-14	287	20	1.54	2.95	2.81	0.767028	0.734866	0.742949	11.6417	10.106	10.1647
2013	2013-10-14	287	21	1.87	3.03	2.93	0.767951	0.734854	0.742919	11.6157	10.1218	10.1931
2013	2013-10-14	287	22	1.88	2.77	3.05	0.767471	0.734758	0.742782	11.5803	10.1303	10.2125
2013	2013-10-14	287	23	1.88	3.27	3.53	0.767852	0.734754	0.742758	11.5407	10.1339	10.2272
2013	2013-10-15	288	0	2.02	3.18	3.1	0.768117	0.734776	0.742713	11.5022	10.1353	10.2388
2013	2013-10-15	288	1	2.01	3.29	3.27	0.767663	0.734726	0.742615	11.463	10.1351	10.2462
2013	2013-10-15	288	2	2.18	3.66	3.93	0.767048	0.734681	0.742512	11.4267	10.1322	10.2515
2013	2013-10-15	288	3	2.07	3.72	3.53	0.766714	0.734663	0.74245	11.3925	10.1285	10.2553
2013	2013-10-15	288	4	1.89	3.75	3.57	0.766971	0.734697	0.742498	11.3603	10.125	10.2587
2013	2013-10-15	288	5	1.87	3.72	3.29	0.768368	0.734862	0.742677	11.3325	10.1215	10.2639
2013	2013-10-15	288	6	1.99	3.15	3.37	0.769298	0.734872	0.742755	11.3042	10.1186	10.2678
2013	2013-10-15	288	7	1.98	2.84	3.77	0.769698	0.734891	0.742728	11.2711	10.1081	10.267
2013	2013-10-15	288	8	2.15	3.75	3.57	0.769759	0.734936	0.742664	11.2308	10.0815	10.2557
2013	2013-10-15	288	9	2.16	3.53	4.07	0.768951	0.734884	0.742552	11.2402	10.0837	10.268
2013	2013-10-15	288	10	2.44	3.57	4.38	0.767779	0.734814	0.742423	11.2774	10.0922	10.2833
2013	2013-10-15	288	11	2.4	3.96	4.35	0.76611	0.734675	0.74226	11.3573	10.1304	10.3192
2013	2013-10-15	288	12	2.54	2.89	4.29	0.764863	0.734634	0.742136	11.3979	10.1272	10.3229
2013	2013-10-15	288	13	2.74	3.47	6.08	0.762837	0.734474	0.742004	11.519	10.1807	10.3763
2013	2013-10-15	288	14	2.7	3.47	4.63	0.760952	0.734374	0.741892	11.6238	10.2089	10.4002
2013	2013-10-15	288	15	2.93	3.58	4.45	0.758502	0.734165	0.741785	11.7932	10.2838	10.4525
2013	2013-10-15	288	16	2.93	3.46	4.19	0.75521	0.733909	0.741758	12.0442	10.378	10.493
2013	2013-10-15	288	17	2.96	4.17	4.4	0.752009	0.733595	0.741568	12.2872	10.4953	10.6905
2013	2013-10-15	288	18	2.79	3	4.54	0.749347	0.733312	0.741363	12.4608	10.5999	10.8417
2013	2013-10-15	288	19	3.09	4.43	7.11	0.747665	0.73308	0.741179	12.5584	10.6867	10.9423
2013	2013-10-15	288	20	3.05	2.7	7.68	0.747035	0.732968	0.741038	12.5626	10.7236	10.9872
2013	2013-10-15	288	21	3.19	3.56	3.74	0.74694	0.732913	0.740932	12.5159	10.736	11.0006
2013	2013-10-15	288	22	2.74	4.68	4.63	0.746948	0.732877	0.740828	12.4575	10.7384	11.0034
2013	2013-10-15	288	23	2.84	3.27	5.34	0.747157	0.73285	0.740741	12.3861	10.7272	10.995
2013	2013-10-16	289	0	2.86	3.43	5.2	0.747461	0.732831	0.74067	12.3109	10.7133	10.9798
2013	2013-10-16	289	1	2.91	6.33	5.94	0.747853	0.73284	0.740617	12.2347	10.6953	10.9634
2013	2013-10-16	289	2	2.86	5.17	4.53	0.748129	0.732843	0.740567	12.1692	10.6824	10.9495
2013	2013-10-16	289	3	2.59	3.83	3.88	0.748416	0.732834	0.740516	12.1078	10.6757	10.9396
2013	2013-10-16	289	4	2.53	4.18	3.48	0.748897	0.732852	0.740481	12.0311	10.6557	10.9211
2013	2013-10-16	289	5	2.6	4.02	3.46	0.749666	0.732942	0.740464	11.9209	10.6052	10.8781
2013	2013-10-16	289	6	2.6	4.66	3.3	0.750141	0.732993	0.740434	11.8397	10.5742	10.8446
2013	2013-10-16	289	7	2.67	3.83	3.74	0.750388	0.733019	0.740372	11.7823	10.5559	10.8252
2013	2013-10-16	289	8	2.65	3.2	4.1	0.751029	0.733152	0.740353	11.6862	10.4908	10.772
2013	2013-10-16	289	9	2.7	3.61	4.12	0.751474	0.733277	0.740339	11.6137	10.4303	10.7239
2013	2013-10-16	289	10	2.9	3.56	3.92	0.75196	0.733467	0.740332	11.5371	10.3374	10.6386
2013	2013-10-16	289	11	2.85	3.86	4.15	0.75307	0.733124	0.7404	11.3938	10.1482	10.4546
2013	2013-10-16	289	12	3.51	3.91	3.96	0.748598	0.733151	0.740154	11.8179	10.4408	10.7032
2013	2013-10-16	289	13	3.56	3.71	4.1	0.7448	0.732787	0.740041	12.1701	10.578	10.8101
2013	2013-10-16	289	14	3.71	4.12	4.38	0.740202	0.732359	0.739908	12.6101	10.7481	10.951
2013	2013-10-16	289	15	3.74	3.71	4.06	0.736467	0.732017	0.739795	12.9609	10.8836	11.0621
2013	2013-10-16	289	16	3.64	4.53	4.45	0.733144	0.731674	0.739714	13.2719	11.0231	11.1177
2013	2013-10-16	289	17	3.53	4.15	4.23	0.730304	0.731283	0.739523	13.5345	11.1839	11.3346
2013	2013-10-16	289	18	3.41	4.11	3.96	0.728271	0.730942	0.739357	13.7154	11.3296	11.5029
2013	2013-10-16	289	19	3.87	4.39	4.94	0.727417	0.730727	0.739239	13.7756	11.4221	11.6023
2013	2013-10-16	289	20	3.83	4.58	3.54	0.727143	0.730544	0.739136	13.7765	11.5015	11.6813
2013	2013-10-16	289	21	3.06	4.69	2.88	0.727717	0.730487	0.739083	13.6875	11.5238	11.7087
2013	2013-10-16	289	22	3.11	3.68	2.4	0.72894	0.730512	0.739068	13.5303	11.5071	11.686
2013	2013-10-16	289	23	2.71	4.28	2.14	0.730459	0.730609	0.739071	13.3459	11.4583	11.6228
2013	2013-10-17	290	0	2.65	3.73	1.97	0.732243	0.730771	0.739092	13.1353	11.3802	11.5355
2013	2013-10-17	290	1	2.57	3.51	1.78	0.734186	0.730958	0.739133	12.9088	11.2891	11.4262
2013	2013-10-17	290	2	2.6	3.79	2.04	0.736141	0.731156	0.73918	12.6835	11.1923	11.3088
2013	2013-10-17	290	3	2.37	3.86	1.63	0.738184	0.731383	0.73924	12.4517	11.081	11.1699
2013	2013-10-17	290	4	2.43	3.64	1.58	0.740385	0.731659	0.739318	12.204	10.9498	11.0128
2013	2013-10-17	290	5	2.32	3.55	1.5	0.742342	0.731903	0.739386	11.9799	10.8301	10.8678
2013	2013-10-17	290	6	2.2	3.41	1.44	0.744398	0.732182	0.739457	11.7475	10.6952	10.7074
2013	2013-10-17	290	7	2.22	2.86	1.62	0.746868	0.732546	0.739555	11.4742	10.5224	10.5043
2013	2013-10-17	290	8	2.26	2.95	1.89	0.749448	0.732983	0.739666	11.193	10.3173	10.2813
2013	2013-10-17	290	9	2.43	3.47	1.95	0.751556	0.733391	0.739768	10.9617	10.1256	10.0956
2013	2013-10-17	290	10	2.72	3.09	2.28	0.754409	0.715975	0.733365	10.6497	9.81526	9.8148
2013	2013-10-17	290	11	2.55	3.72	2.76	0.756659	0.712564	0.732915	10.3929	9.44419	9.51436
2013	2013-10-17	290	12	3.08	3.71	3.02	0.751662	0.714305	0.732874	10.8944	9.83358	9.80587
2013	2013-10-17	290	13	3.94	3.58	3.69	0.746442	0.731789	0.734397	11.4193	10.0497	9.9744
2013	2013-10-17	290	14	3.63	3.7	4.41	0.741513	0.733033	0.739536	11.9169	10.1625	10.0661
2013	2013-10-17	290	15	4.25	3.85	4.07	0.736314	0.732633	0.739415	12.4426	10.3221	10.1865
2013	2013-10-17	290	16	3.54	4.26	3.54	0.730437	0.732186	0.739271	13.0434	10.506	10.371
2013	2013-10-17	290	17	3.39	3.86	3.74	0.726728	0.731854	0.739089	13.4149	10.6387	10.5487
2013	2013-10-17	290	18	3.4	4.22	3.84	0.724681	0.731553	0.738948	13.6058	10.7622	10.6903
2013	2013-10-17	290	19	4.03	4.59	3.8	0.723645	0.731269	0.738848	13.6921	10.8838	10.808
2013	2013-10-17	290	20	3.37	3.62	3.07	0.723578	0.731082	0.738754	13.6762	10.9634	10.8884
2013	2013-10-17	290	21	2.78	3.65	2.77	0.724612	0.731025	0.738695	13.5421	10.9836	10.9121
2013	2013-10-17	290	22	2.9	3.46	2.67	0.726152	0.731078	0.738672	13.354	10.9547	10.8896
2013	2013-10-17	290	23	2.84	4.1	2.41	0.727878	0.731157	0.73868	13.1481	10.911	10.844
2013	2013-10-18	291	0	2.68	3.77	2.28	0.729565	0.731257	0.738697	12.9489	10.8595	10.7891
2013	2013-10-18	291	1	2.52	3.4	2.07	0.731267	0.731363	0.738722	12.7486	10.8057	10.7292
2013	2013-10-18	291	2	2.85	3.26	2.04	0.733116	0.73152	0.738751	12.5347	10.728	10.6476
2013	2013-10-18	291	3	2.87	3.26	2.28	0.734894	0.731676	0.738786	12.3299	10.6499	10.5602
2013	2013-10-18	291	4	2.61	3.74	2.19	0.736613	0.731826	0.738824	12.1335	10.5725	10.4736
2013	2013-10-18	291	5	2.54	3.17	1.82	0.738173	0.73196	0.738853	11.9552	10.5053	10.3973
2013	2013-10-18	291	6	2.41	3.55	1.78	0.739811	0.732101	0.738885	11.7687	10.4325	10.3075
2013	2013-10-18	291	7	2.31	2.98	1.67	0.741739	0.732332	0.738954	11.5518	10.3197	10.1788
2013	2013-10-18	291	8	2.52	3.73	2.11	0.743896	0.732655	0.73641	11.3127	10.1655	10.0186
2013	2013-10-18	291	9	2.5	3	2.14	0.746148	0.718253	0.732363	11.0641	9.98141	9.84875
2013	2013-10-18	291	10	2.8	3.08	2.7	0.748153	0.712203	0.732331	10.8379	9.77433	9.66047
2013	2013-10-18	291	11	2.99	3.66	3.38	0.748473	0.712176	0.732297	10.7887	9.64618	9.56621
2013	2013-10-18	291	12	3.14	3.22	3.05	0.744896	0.712123	0.732265	11.1549	9.88315	9.75449
2013	2013-10-18	291	13	4.03	3.88	2.92	0.741564	0.724636	0.732228	11.4932	10.0187	9.85103
2013	2013-10-18	291	14	3.55	4.19	3.15	0.736648	0.732374	0.734228	11.9993	10.1664	9.97297
2013	2013-10-18	291	15	4.03	3.67	3.01	0.731557	0.731988	0.737885	12.5265	10.3228	10.1028
2013	2013-10-18	291	16	3.72	4.25	2.82	0.725913	0.731568	0.737945	13.1177	10.4966	10.2166
2013	2013-10-18	291	17	3.44	4.39	3.58	0.722054	0.731233	0.738284	13.5153	10.6322	10.5731
2013	2013-10-18	291	18	3.44	3.54	3.93	0.720349	0.730984	0.738098	13.678	10.732	10.788
2013	2013-10-18	291	19	3.6	3.84	3.51	0.719537	0.730735	0.737957	13.7435	10.8345	10.933
2013	2013-10-18	291	20	3.26	3.72	3.1	0.719762	0.73054	0.737881	13.6976	10.8991	11.0066
2013	2013-10-18	291	21	3.02	3.71	2.68	0.720912	0.730472	0.737845	13.5536	10.9173	11.0159
2013	2013-10-18	291	22	3	4.2	2.39	0.722367	0.730455	0.737827	13.3775	10.9147	10.9903
2013	2013-10-18	291	23	2.73	3.22	2.14	0.724122	0.730509	0.737835	13.17	10.8769	10.9251
2013	2013-10-19	292	0	2.66	3.24	1.8	0.725957	0.730566	0.737841	12.9496	10.8357	10.8468
2013	2013-10-19	292	1	2.58	3.71	1.84	0.728182	0.730749	0.737899	12.6873	10.7402	10.7183
2013	2013-10-19	292	2	2.86	3.63	1.93	0.730512	0.731008	0.737973	12.4192	10.6097	10.5653
2013	2013-10-19	292	3	3.15	3.23	2.34	0.732516	0.731243	0.738034	12.1918	10.5031	10.4341
2013	2013-10-19	292	4	2.84	3.19	2.4	0.733741	0.731332	0.738064	12.0517	10.4463	10.3581
2013	2013-10-19	292	5	2.94	3.38	2.99	0.734736	0.731412	0.738077	11.937	10.4015	10.3068
2013	2013-10-19	292	6	2.79	3.41	2.6	0.735568	0.731457	0.738087	11.8418	10.3647	10.262
2013	2013-10-19	292	7	2.74	3.7	3.06	0.736395	0.731526	0.7381	11.752	10.324	10.2178
2013	2013-10-19	292	8	2.66	4.1	3.06	0.737159	0.731573	0.738118	11.6698	10.2845	10.1794
2013	2013-10-19	292	9	3.07	3.36	3.21	0.737792	0.731616	0.738152	11.6022	10.2478	10.1449
2013	2013-10-19	292	10	2.88	3.18	3.18	0.738073	0.731664	0.738172	11.573	10.2311	10.1294
2013	2013-10-19	292	11	2.96	3.5	3.17	0.7381	0.731661	0.738176	11.5718	10.2214	10.1172
2013	2013-10-19	292	12	2.94	3.25	3.29	0.737907	0.731643	0.738161	11.5961	10.2286	10.1226
2013	2013-10-19	292	13	2.87	3.53	2.93	0.737703	0.731615	0.738152	11.6184	10.2352	10.1256
2013	2013-10-19	292	14	2.9	3.39	2.8	0.737362	0.731574	0.738137	11.6556	10.2471	10.1357
2013	2013-10-19	292	15	2.9	3.4	2.99	0.737103	0.731567	0.737701	11.6826	10.2445	10.1241
2013	2013-10-19	292	16	3.04	3.61	2.67	0.736624	0.731503	0.738088	11.7286	10.2607	10.1372
2013	2013-10-19	292	17	2.81	3.57	3.62	0.735069	0.731302	0.73802	11.8916	10.3343	10.2213
2013	2013-10-19	292	18	2.79	3.44	3.23	0.733732	0.731005	0.737948	12.0277	10.4136	10.3011
2013	2013-10-19	292	19	2.72	3.65	2.76	0.733306	0.730831	0.737904	12.0653	10.4536	10.3315
2013	2013-10-19	292	20	2.64	3.38	2.57	0.733576	0.730545	0.737887	12.0254	10.466	10.3336
2013	2013-10-19	292	21	2.56	3.27	2.33	0.733814	0.730335	0.737879	11.9897	10.5031	10.3513
2013	2013-10-19	292	22	2.74	3.44	1.9	0.73465	0.730309	0.737872	11.89	10.4855	10.3175
2013	2013-10-19	292	23	2.57	3.21	1.76	0.736003	0.730384	0.737894	11.7342	10.4414	10.2503
2013	2013-10-20	293	0	2.47	3.59	1.73	0.737486	0.730494	0.737932	11.5648	10.3826	10.1722
2013	2013-10-20	293	1	2.4	3.19	1.89	0.739327	0.730701	0.737631	11.3586	10.2763	10.0511
2013	2013-10-20	293	2	2.6	3.63	1.84	0.740823	0.730864	0.731578	11.1925	10.1917	9.94794
2013	2013-10-20	293	3	2.41	3.55	1.89	0.741959	0.730981	0.731562	11.0665	10.128	9.87107
2013	2013-10-20	293	4	2.47	3.6	1.92	0.743091	0.731122	0.731545	10.941	10.0545	9.79238
2013	2013-10-20	293	5	2.77	3.41	2.19	0.744041	0.71638	0.731529	10.8344	9.99564	9.72467
2013	2013-10-20	293	6	2.57	3.24	2.07	0.744888	0.711169	0.731514	10.7412	9.94124	9.66595
2013	2013-10-20	293	7	2.48	2.87	2.18	0.745899	0.711159	0.731496	10.6283	9.87942	9.60182
2013	2013-10-20	293	8	2.19	3.24	1.7	0.746885	0.711146	0.731473	10.5222	9.82638	9.54916
2013	2013-10-20	293	9	2.6	3.05	2.26	0.748034	0.711135	0.731452	10.4	9.72671	9.45709
2013	2013-10-20	293	10	2.59	3	2.04	0.748877	0.711121	0.731437	10.3048	9.64877	9.35868
2013	2013-10-20	293	11	2.42	3.06	1.97	0.749366	0.711089	0.73141	10.2376	9.50504	9.27207
2013	2013-10-20	293	12	2.44	3.51	2.08	0.747231	0.711032	0.731384	10.4511	9.63255	9.36182
2013	2013-10-20	293	13	2.77	3.51	2.2	0.745373	0.710975	0.731337	10.6312	9.62756	9.35123
2013	2013-10-20	293	14	2.56	3.27	2.09	0.742101	0.710908	0.731283	10.9652	9.7308	9.42728
2013	2013-10-20	293	15	2.86	3.38	2.22	0.739347	0.710856	0.731236	11.2396	9.76642	9.45646
2013	2013-10-20	293	16	2.47	3.5	2.14	0.736267	0.710814	0.731212	11.5532	9.83996	9.51517
2013	2013-10-20	293	17	2.95	3.55	1.76	0.734258	0.710766	0.731178	11.7489	9.88315	9.69383
2013	2013-10-20	293	18	2.64	3.28	1.67	0.733455	0.7107	0.731138	11.8108	9.93182	9.82452
2013	2013-10-20	293	19	3.01	3.6	1.63	0.733586	0.710661	0.731103	11.7733	9.96557	9.86456
2013	2013-10-20	293	20	2.45	3.01	1.52	0.734491	0.710633	0.73107	11.6526	9.95327	9.82543
2013	2013-10-20	293	21	2.22	2.84	1.39	0.736021	0.710607	0.731035	11.4657	9.91155	9.74534
2013	2013-10-20	293	22	2.15	3.07	1.2	0.737767	0.710579	0.731013	11.2605	9.85655	9.6498
2013	2013-10-20	293	23	2.18	2.78	1.2	0.739666	0.710559	0.730991	11.0411	9.78225	9.53654
2013	2013-10-21	294	0	2.08	2.96	1.28	0.741783	0.710533	0.730963	10.7996	9.68479	9.38564
2013	2013-10-21	294	1	1.9	2.71	1.09	0.744173	0.710509	0.730921	10.5305	9.55646	9.19923
2013	2013-10-21	294	2	1.83	2.67	1.13	0.746665	0.71049	0.730893	10.2535	9.41449	8.99159
2013	2013-10-21	294	3	1.89	2.58	1.04	0.698062	0.710471	0.73087	9.97987	9.26796	8.77302
2013	2013-10-21	294	4	1.72	2.62	1.13	0.662451	0.71045	0.730845	9.75341	9.14504	8.58551
2013	2013-10-21	294	5	1.88	2.92	1.04	0.66245	0.71043	0.730822	9.46919	8.96594	8.34559
2013	2013-10-21	294	6	1.71	2.49	1.1	0.662455	0.710416	0.7308	9.251	8.82853	8.15286
2013	2013-10-21	294	7	1.74	2.62	1.36	0.662468	0.710403	0.730773	9.03806	8.6705	7.95526
2013	2013-10-21	294	8	1.93	2.64	1.52	0.662472	0.710389	0.730752	8.84351	8.50494	7.76796
2013	2013-10-21	294	9	1.84	2.76	1.94	0.662484	0.710379	0.730735	8.69921	8.35068	7.6081
2013	2013-10-21	294	10	2.05	3.19	2.11	0.662462	0.710357	0.730717	8.67241	8.26294	7.50949
2013	2013-10-21	294	11	2.16	2.82	2.14	0.662401	0.710324	0.730692	8.61667	8.10021	7.35535
2013	2013-10-21	294	12	2.14	3.2	2.51	0.662296	0.710341	0.730662	9.05197	8.32502	7.57446
2013	2013-10-21	294	13	2.64	3.01	2.25	0.662207	0.710258	0.730616	9.28093	8.3083	7.59922
2013	2013-10-21	294	14	2.61	2.94	2.34	0.6621	0.710228	0.73058	9.63813	8.40427	7.67317
2013	2013-10-21	294	15	2.66	3.06	2.23	0.731239	0.710193	0.730552	10.1893	8.58682	7.84892
2013	2013-10-21	294	16	2.69	2.88	2.09	0.741648	0.710154	0.730519	10.7069	8.77873	8.0367
2013	2013-10-21	294	17	3.11	2.96	2.27	0.740107	0.710148	0.730524	10.8622	8.807	8.0714
2013	2013-10-21	294	18	2.42	2.86	2.17	0.739139	0.71014	0.730521	10.9531	8.88006	8.15963
2013	2013-10-21	294	19	2.24	3	1.84	0.738698	0.710123	0.730543	10.9947	8.9611	8.24462
2013	2013-10-21	294	20	2.42	3.05	1.76	0.739353	0.710119	0.730565	10.9154	8.96936	8.25612
2013	2013-10-21	294	21	2.06	3.13	1.81	0.740501	0.710108	0.730566	10.7883	8.96023	8.24349
2013	2013-10-21	294	22	2	2.72	1.69	0.741863	0.710105	0.730574	10.6389	8.93911	8.22587
2013	2013-10-21	294	23	2.09	3.06	1.72	0.743399	0.7101	0.730579	10.4715	8.90024	8.18795
2013	2013-10-22	295	0	1.98	3.28	1.75	0.744682	0.710097	0.730581	10.3339	8.87487	8.16638
2013	2013-10-22	295	1	2.2	3.24	1.84	0.746139	0.710093	0.730581	10.1782	8.81624	8.12019
2013	2013-10-22	295	2	2.14	3.33	1.84	0.746237	0.71009	0.730582	10.0539	8.78023	8.09131
2013	2013-10-22	295	3	2.15	3.17	1.88	0.663223	0.710087	0.730582	9.94431	8.74085	8.06511
2013	2013-10-22	295	4	2.14	2.65	1.88	0.661807	0.710084	0.730579	9.84672	8.7081	8.04198
2013	2013-10-22	295	5	2.12	2.78	1.93	0.661835	0.710082	0.730576	9.75708	8.67353	8.02071
2013	2013-10-22	295	6	2.03	2.99	1.97	0.661918	0.710076	0.730622	9.67852	8.64315	8.00317
2013	2013-10-22	295	7	1.11	2.62	1.85	0.662168	0.710444	0.731132	9.60444	8.61446	7.99296
2013	2013-10-22	295	8	1.07	2.23	1.63	0.666086	0.711567	0.732226	9.55392	8.59595	7.98939
2013	2013-10-22	295	9	0.85	2.15	1.86	0.675869	0.713172	0.733173	9.50715	8.58155	7.99211
2013	2013-10-22	295	10	1.17	2.12	2.12	0.680971	0.713254	0.733593	9.38928	8.51126	7.93829
2013	2013-10-22	295	11	1.42	2.29	2.8	0.680482	0.713044	0.733714	9.40109	8.52219	7.94535
2013	2013-10-22	295	12	1.39	2.32	2.67	0.679999	0.712985	0.733931	9.43495	8.51013	7.93743
2013	2013-10-22	295	13	2.07	2.39	2.51	0.679882	0.713001	0.734104	9.57881	8.51943	7.96075
2013	2013-10-22	295	14	1.96	2.39	2.22	0.718168	0.712931	0.734171	9.97638	8.59805	8.04272
2013	2013-10-22	295	15	2.49	2.65	1.97	0.769186	0.712848	0.734172	10.4644	8.69152	8.09183
2013	2013-10-22	295	16	2.21	2.83	2.51	0.762451	0.712786	0.734226	10.9868	8.82414	8.24668
2013	2013-10-22	295	17	2.08	2.66	2.63	0.757314	0.71273	0.734143	11.3545	8.93562	8.56549
2013	2013-10-22	295	18	1.98	2.63	2.39	0.754978	0.712688	0.734022	11.4531	8.98845	8.72997
2013	2013-10-22	295	19	2.01	2.46	2.69	0.753721	0.712654	0.733913	11.4483	9.04756	8.82018
2013	2013-10-22	295	20	1.97	2.46	2.48	0.753059	0.712629	0.733837	11.4207	9.11943	8.8896
2013	2013-10-22	295	21	1.79	2.71	2.29	0.753395	0.712605	0.733743	11.3067	9.1291	8.88688
2013	2013-10-22	295	22	1.6	2.28	2.23	0.754624	0.712573	0.733674	11.1132	9.09966	8.82672
2013	2013-10-22	295	23	1.6	2.37	1.72	0.756027	0.712546	0.73362	10.9089	9.0531	8.75882
2013	2013-10-23	296	0	1.65	2.4	1.66	0.75766	0.712523	0.733563	10.6882	8.992	8.66002
2013	2013-10-23	296	1	1.64	2.28	1.85	0.75936	0.712501	0.733511	10.4688	8.91625	8.5476
2013	2013-10-23	296	2	1.61	2.33	1.82	0.760829	0.712481	0.733464	10.278	8.84435	8.45178
2013	2013-10-23	296	3	1.64	2.35	1.77	0.762316	0.712462	0.733417	10.092	8.76897	8.35132
2013	2013-10-23	296	4	1.68	2.2	1.87	0.676473	0.712447	0.733374	9.93108	8.69678	8.26085
2013	2013-10-23	296	5	1.81	2.34	1.95	0.670949	0.712433	0.733334	9.78001	8.62781	8.17145
2013	2013-10-23	296	6	1.85	2.58	2.02	0.670802	0.71242	0.7333	9.64702	8.56534	8.09435
2013	2013-10-23	296	7	1.56	2.17	2.2	0.670656	0.712408	0.733259	9.51742	8.49337	8.01295
2013	2013-10-23	296	8	1.94	2.42	2.55	0.67052	0.712398	0.73322	9.38195	8.4086	7.92383
2013	2013-10-23	296	9	2.05	2.39	3	0.670384	0.712389	0.733174	9.30939	8.3531	7.87505
2013	2013-10-23	296	10	1.84	2.68	2.96	0.670237	0.712372	0.733141	9.2206	8.28547	7.80816
2013	2013-10-23	296	11	1.9	2.71	3	0.670077	0.712348	0.733102	9.31653	8.31229	7.84366
2013	2013-10-23	296	12	1.99	2.79	3.05	0.669898	0.712323	0.733062	9.45479	8.34855	7.87865
2013	2013-10-23	296	13	2.2	2.65	3.23	0.669707	0.712294	0.733028	9.63624	8.39757	7.91216
2013	2013-10-23	296	14	2.17	2.58	2.92	0.69865	0.712271	0.732993	9.95401	8.54527	8.0459
2013	2013-10-23	296	15	2.36	2.74	3.44	0.758493	0.712253	0.732948	10.1604	8.62664	8.10611
2013	2013-10-23	296	16	2.27	2.96	2.96	0.756386	0.712235	0.732905	10.3475	8.731	8.19418
2013	2013-10-23	296	17	2.25	2.78	3.53	0.754654	0.712221	0.732863	10.4979	8.82563	8.28493
2013	2013-10-23	296	18	2.17	3.3	3.4	0.75339	0.712211	0.732823	10.6017	8.91106	8.35631
2013	2013-10-23	296	19	2.33	2.78	3.2	0.752327	0.712202	0.73279	10.6857	9.00555	8.43943
2013	2013-10-23	296	20	2.6	2.82	3.26	0.751987	0.712196	0.732759	10.6951	9.06877	8.49184
2013	2013-10-23	296	21	2.22	2.64	2.83	0.752092	0.712191	0.732735	10.66	9.1271	8.54078
2013	2013-10-23	296	22	2.2	2.6	2.63	0.752795	0.712186	0.732707	10.5646	9.12461	8.5402
2013	2013-10-23	296	23	1.96	2.63	2.2	0.753967	0.71218	0.732679	10.4222	9.09787	8.50923
2013	2013-10-24	297	0	2.17	2.64	2.11	0.755285	0.712172	0.732648	10.264	9.05392	8.46326
2013	2013-10-24	297	1	2.16	2.71	2.29	0.756618	0.712163	0.732623	10.1092	9.01242	8.4095
2013	2013-10-24	297	2	2.25	2.42	1.93	0.687691	0.712155	0.732599	9.95664	8.96503	8.35011
2013	2013-10-24	297	3	2.1	2.48	1.92	0.667704	0.712145	0.732577	9.79089	8.8966	8.27458
2013	2013-10-24	297	4	1.91	2.55	2	0.667648	0.712136	0.73255	9.62831	8.82857	8.19093
2013	2013-10-24	297	5	1.8	2.43	1.81	0.667587	0.712126	0.732529	9.47468	8.76818	8.10616
2013	2013-10-24	297	6	1.75	2.33	1.61	0.667534	0.712115	0.732504	9.32085	8.69567	8.0248
2013	2013-10-24	297	7	1.74	2.55	1.6	0.667492	0.712105	0.732439	9.12612	8.5779	7.89698
2013	2013-10-24	297	8	2.05	2.46	1.83	0.667444	0.712098	0.732526	8.92947	8.44347	7.75256
2013	2013-10-24	297	9	1.93	2.65	2.42	0.667398	0.712088	0.732485	8.77086	8.32307	7.63293
2013	2013-10-24	297	10	1.85	2.48	2.73	0.667331	0.712062	0.73244	8.64203	8.17621	7.52373
2013	2013-10-24	297	11	2.05	2.77	3.02	0.667221	0.712024	0.732392	8.2756	7.83385	7.14991
2013	2013-10-24	297	12	2.31	2.83	2.96	0.667091	0.711987	0.732341	8.87826	8.19004	7.53615
2013	2013-10-24	297	13	2.84	2.9	3.05	0.666967	0.711948	0.73229	9.39614	8.37682	7.73831
2013	2013-10-24	297	14	2.52	3.01	3.13	0.714598	0.711918	0.73225	10.0222	8.5063	7.86031
2013	2013-10-24	297	15	3.09	3.4	3.85	0.749202	0.711894	0.732134	10.6936	8.66957	7.95921
2013	2013-10-24	297	16	2.87	3.19	3.33	0.742317	0.711875	0.732267	11.4013	8.86493	8.26696
2013	2013-10-24	297	17	2.8	3.23	3.87	0.737274	0.71187	0.732224	11.9146	9.05732	8.62691
2013	2013-10-24	297	18	2.61	3.27	3.33	0.734873	0.711887	0.732177	12.1433	9.20824	8.92054
2013	2013-10-24	297	19	2.9	3.24	3.69	0.733989	0.711866	0.732139	12.2115	9.33448	9.0984
2013	2013-10-24	297	20	2.62	3.46	3.38	0.733991	0.711835	0.732109	12.1857	9.43709	9.20816
2013	2013-10-24	297	21	2.51	2.97	2.87	0.734978	0.711835	0.732081	12.0578	9.48413	9.24558
2013	2013-10-24	297	22	2.25	3.1	2.61	0.736398	0.711824	0.732055	11.885	9.48893	9.23099
2013	2013-10-24	297	23	2.35	2.95	2.05	0.738213	0.711815	0.732045	11.6715	9.46079	9.17224
2013	2013-10-25	298	0	2.11	3.29	2.05	0.740218	0.711807	0.732016	11.4385	9.41418	9.09494
2013	2013-10-25	298	1	2.28	2.7	2.11	0.742212	0.711796	0.732007	11.2108	9.36048	9.0072
2013	2013-10-25	298	2	2.03	2.53	1.77	0.744238	0.711784	0.731999	10.9796	9.29136	8.906
2013	2013-10-25	298	3	2.04	3.23	1.65	0.74634	0.711772	0.731977	10.7434	9.21449	8.79165
2013	2013-10-25	298	4	1.85	2.75	1.55	0.748347	0.711755	0.731982	10.5184	9.13238	8.67438
2013	2013-10-25	298	5	1.87	2.75	1.37	0.750368	0.711742	0.731974	10.2936	9.0403	8.54952
2013	2013-10-25	298	6	1.85	2.49	1.38	0.726478	0.711729	0.731957	10.058	8.93408	8.39901
2013	2013-10-25	298	7	1.81	2.65	1.52	0.664978	0.711715	0.731971	9.79313	8.79705	8.22031
2013	2013-10-25	298	8	1.8	2.58	1.65	0.664912	0.711704	0.731956	9.52811	8.62878	8.02557
2013	2013-10-25	298	9	1.88	2.53	2.18	0.664894	0.711692	0.7319	9.25946	8.42973	7.82238
2013	2013-10-25	298	10	2.02	2.77	2.56	0.664871	0.711678	0.731903	9.09695	8.28963	7.69209
2013	2013-10-25	298	11	2.16	3.09	3.43	0.664812	0.711652	0.731921	9.13526	8.27572	7.65776
2013	2013-10-25	298	12	2.26	2.73	3.59	0.664736	0.711622	0.73188	9.25259	8.25675	7.65907
2013	2013-10-25	298	13	2.45	2.89	2.89	0.664626	0.711577	0.731775	9.61433	8.39226	7.77944
2013	2013-10-25	298	14	2.51	3.27	3.05	0.714101	0.711544	0.731755	10.0022	8.45156	7.84442
2013	2013-10-25	298	15	2.69	3.21	3.37	0.748076	0.711509	0.73171	10.424	8.59186	7.91923
2013	2013-10-25	298	16	2.79	3.48	3.84	0.742144	0.711476	0.73167	11.0406	8.77814	8.15644
2013	2013-10-25	298	17	2.78	2.94	3.67	0.737913	0.711418	0.73163	11.4756	8.92494	8.33478
2013	2013-10-25	298	18	2.61	3.04	3.63	0.735793	0.711314	0.731626	11.6818	9.03831	8.4545
2013	2013-10-25	298	19	2.74	3.16	4.5	0.734882	0.711222	0.731634	11.7601	9.1352	8.53918
2013	2013-10-25	298	20	2.47	2.93	3.29	0.734474	0.711209	0.731623	11.7843	9.25176	8.62761
2013	2013-10-25	298	21	2.63	3.03	3.32	0.735241	0.711196	0.731612	11.6826	9.28029	8.64976
2013	2013-10-25	298	22	2.44	2.89	2.93	0.73632	0.711188	0.731622	11.5491	9.29848	8.66018
2013	2013-10-25	298	23	2.39	2.83	3.08	0.737577	0.711179	0.731591	11.397	9.28751	8.65654
2013	2013-10-26	299	0	2.35	2.81	2.67	0.739012	0.711168	0.731574	11.2282	9.26308	8.62559
2013	2013-10-26	299	1	2.35	2.84	2.68	0.740555	0.711156	0.731556	11.0488	9.21653	8.57408
2013	2013-10-26	299	2	2.46	3.23	2.94	0.741883	0.711146	0.731547	10.8949	9.18043	8.54366
2013	2013-10-26	299	3	2.26	2.9	2.89	0.742983	0.711136	0.731537	10.7659	9.14751	8.52217
2013	2013-10-26	299	4	2.25	3.08	2.19	0.743955	0.711125	0.731521	10.6523	9.11839	8.49964
2013	2013-10-26	299	5	2.27	2.83	2.33	0.744871	0.711115	0.731517	10.5445	9.08801	8.47311
2013	2013-10-26	299	6	2.21	2.83	2.05	0.745742	0.711109	0.731511	10.4444	9.0613	8.44586
2013	2013-10-26	299	7	2.22	2.65	2.07	0.746758	0.7111	0.731495	10.3233	9.00274	8.40234
2013	2013-10-26	299	8	2.31	2.99	3.19	0.747737	0.711091	0.731477	10.2105	8.95108	8.35991
2013	2013-10-26	299	9	2.36	2.91	2.6	0.748283	0.711077	0.731467	10.1435	8.89917	8.31886
2013	2013-10-26	299	10	2.46	3.15	2.87	0.748155	0.711052	0.731455	10.1433	8.87578	8.30828
2013	2013-10-26	299	11	2.53	3.34	2.66	0.725491	0.711022	0.731429	10.1025	8.80326	8.22576
2013	2013-10-26	299	12	2.7	3.17	3	0.727541	0.710986	0.731393	10.3339	8.8895	8.31608
2013	2013-10-26	299	13	2.92	3.29	4.77	0.741636	0.71094	0.731335	10.802	9.09894	8.54461
2013	2013-10-26	299	14	2.86	3.4	3.56	0.738693	0.710899	0.73131	11.1036	9.21009	8.66087
2013	2013-10-26	299	15	3.1	3.41	3.3	0.735978	0.710866	0.7313	11.3802	9.31583	8.75023
2013	2013-10-26	299	16	2.96	3.47	3.44	0.732914	0.71084	0.731254	11.6975	9.44563	8.90451
2013	2013-10-26	299	17	2.94	3.78	3.22	0.730295	0.710815	0.731219	11.9651	9.54987	9.03123
2013	2013-10-26	299	18	2.77	3.69	4	0.728826	0.710774	0.731201	12.107	9.67016	9.21619
2013	2013-10-26	299	19	2.9	3.26	3.45	0.728315	0.710756	0.731176	12.1433	9.76686	9.34278
2013	2013-10-26	299	20	2.65	3.53	2.75	0.72855	0.710745	0.731152	12.1002	9.84324	9.42064
2013	2013-10-26	299	21	2.53	2.95	2.19	0.729455	0.710735	0.73112	11.9846	9.87437	9.4441
2013	2013-10-26	299	22	2.49	2.99	2.16	0.730936	0.710727	0.731084	11.8048	9.83631	9.40911
2013	2013-10-26	299	23	2.55	3.04	2.35	0.732336	0.710719	0.731077	11.6322	9.81451	9.3587
2013	2013-10-27	300	0	2.69	3.63	1.87	0.733621	0.71071	0.731085	11.4789	9.80692	9.32973
2013	2013-10-27	300	1	2.37	3	1.67	0.735127	0.710698	0.73108	11.3024	9.7724	9.27045
2013	2013-10-27	300	2	2.32	2.86	1.69	0.736808	0.710687	0.73107	11.1079	9.71619	9.18876
2013	2013-10-27	300	3	2.28	3.44	1.6	0.738589	0.710675	0.731033	10.9032	9.64448	9.09486
2013	2013-10-27	300	4	2.38	2.81	1.53	0.740535	0.710659	0.731021	10.6804	9.53175	8.98052
2013	2013-10-27	300	5	2.26	2.85	1.77	0.74218	0.710647	0.731032	10.4945	9.46188	8.8934
2013	2013-10-27	300	6	2.23	2.98	1.71	0.743665	0.710644	0.731055	10.3236	9.38616	8.80665
2013	2013-10-27	300	7	2.13	3.53	1.42	0.74539	0.710639	0.731016	10.1292	9.28435	8.69518
2013	2013-10-27	300	8	2.09	2.91	1.71	0.66786	0.710627	0.731001	9.91073	9.14856	8.55405
2013	2013-10-27	300	9	2.29	2.93	1.99	0.660964	0.710616	0.730982	9.72134	9.01519	8.42784
2013	2013-10-27	300	10	2.28	2.91	2.43	0.660934	0.710603	0.730946	9.61744	8.92915	8.36425
2013	2013-10-27	300	11	2.48	3.76	2.64	0.3693	0.6539	0.6873
2013	2013-10-27	300	12	2.78	3.54	2.9	0.743698	0.710487	0.730843	10.2691	9.20371	8.76292
2013	2013-10-27	300	13	3.64	3.48	2.89	0.743185	0.710444	0.730815	10.3132	8.99398	8.48241
2013	2013-10-27	300	14	3.19	3.61	3.78	0.73708	0.710405	0.730752	10.9697	9.12182	8.60322
2013	2013-10-27	300	15	3.9	4.07	4.1	0.730569	0.710376	0.730698	11.677	9.28639	8.78778
2013	2013-10-27	300	16	3.4	3.89	3.58	0.723523	0.710351	0.730699	12.4468	9.45126	8.98631
2013	2013-10-27	300	17	3.47	3.69	3.87	0.718501	0.710333	0.730698	12.9875	9.64091	9.34036
2013	2013-10-27	300	18	3.42	3.52	4.43	0.716115	0.710317	0.730647	13.2343	9.81155	9.7324
2013	2013-10-27	300	19	3.32	3.44	5.22	0.71526	0.712651	0.731233	13.3074	9.9537	9.94256
2013	2013-10-27	300	20	3.3	3.63	2.99	0.715432	0.729598	0.7367	13.2633	10.0581	10.0531
2013	2013-10-27	300	21	2.65	3.56	2.54	0.716653	0.729514	0.736657	13.1045	10.098	10.0708
2013	2013-10-27	300	22	2.62	3.28	1.97	0.718342	0.729481	0.735735	12.8922	10.1005	10.0281
2013	2013-10-27	300	23	2.51	3.82	1.82	0.720357	0.729525	0.730532	12.6481	10.0681	9.94706
2013	2013-10-28	301	0	2.3	3.15	1.59	0.722453	0.729028	0.730512	12.3952	10.0377	9.85553
2013	2013-10-28	301	1	2.3	3.05	1.37	0.724659	0.715832	0.730536	12.1349	9.99053	9.74548
2013	2013-10-28	301	2	2.17	3.38	1.28	0.727033	0.71022	0.730515	11.8499	9.91576	9.60243
2013	2013-10-28	301	3	2.07	2.91	1.08	0.729424	0.710205	0.730515	11.5614	9.83034	9.43947
2013	2013-10-28	301	4	2.14	2.71	1.13	0.732303	0.710183	0.730501	11.2292	9.6727	9.22438
2013	2013-10-28	301	5	2.12	3.03	1.23	0.735038	0.710166	0.730481	10.9147	9.52366	9.00702
2013	2013-10-28	301	6	2.23	2.97	1.14	0.737124	0.710152	0.730424	10.6747	9.44392	8.8422
2013	2013-10-28	301	7	1.92	2.69	1.18	0.73972	0.710135	0.730363	10.3797	9.26526	8.62292
2013	2013-10-28	301	8	2.06	3.09	1.54	0.717999	0.710118	0.730308	10.0667	9.06233	8.38352
2013	2013-10-28	301	9	2.24	2.95	1.93	0.658776	0.710101	0.730317	9.78318	8.8513	8.1632
2013	2013-10-28	301	10	2.6	2.88	2.66	0.65873	0.710079	0.7303	9.62821	8.70172	8.02593
2013	2013-10-28	301	11	2.41	3.09	3.24	0.658677	0.710046	0.730288	9.29669	8.32011	7.65591
2013	2013-10-28	301	12	2.98	3.28	2.36	0.684938	0.710012	0.7303	9.80809	8.60574	7.9542
2013	2013-10-28	301	13	3.25	3.47	3.6	0.739051	0.709974	0.730289	10.4008	8.81456	8.18428
2013	2013-10-28	301	14	3.11	3.41	3.93	0.733831	0.709946	0.730274	10.97	8.90517	8.29908
2013	2013-10-28	301	15	3.39	3.63	4.02	0.728736	0.709921	0.730166	11.5251	9.017	8.41616
2013	2013-10-28	301	16	3.92	3.58	3.17	0.722797	0.709888	0.730137	12.179	9.18717	8.6102
2013	2013-10-28	301	17	3.49	3.61	3.43	0.718042	0.70986	0.730114	12.6979	9.39889	8.95594
2013	2013-10-28	301	18	3	3.56	3.68	0.715225	0.70975	0.730062	12.9968	9.61644	9.37797
2013	2013-10-28	301	19	3.15	3.64	3.34	0.714393	0.709688	0.730032	13.0661	9.75286	9.59208
2013	2013-10-28	301	20	2.79	3.45	3.07	0.714867	0.70967	0.730007	12.9849	9.82516	9.67379
2013	2013-10-28	301	21	2.9	3.37	3.25	0.716331	0.709657	0.729981	12.7982	9.82866	9.66532
2013	2013-10-28	301	22	2.68	3.75	3.28	0.718095	0.709647	0.72996	12.5802	9.80593	9.61957
2013	2013-10-28	301	23	2.65	3.52	3.34	0.719386	0.709635	0.729938	12.4184	9.80963	9.59879
2013	2013-10-29	302	0	2.73	3.3	3.22	0.720416	0.709623	0.729919	12.2885	9.82252	9.58572
2013	2013-10-29	302	1	2.95	3.32	3.13	0.721452	0.709612	0.729902	12.1575	9.82075	9.56347
2013	2013-10-29	302	2	2.73	3.31	2.83	0.722619	0.709598	0.729885	12.0145	9.80287	9.52795
2013	2013-10-29	302	3	2.8	3.7	3.15	0.723604	0.709587	0.729866	11.8853	9.78694	9.49552
2013	2013-10-29	302	4	2.62	3.48	3.13	0.724496	0.709576	0.729847	11.774	9.77459	9.46888
2013	2013-10-29	302	5	2.98	3.41	3.41	0.72527	0.709566	0.729828	11.6771	9.7705	9.44821
2013	2013-10-29	302	6	2.91	3.27	3.32	0.726097	0.709556	0.729808	11.5758	9.75394	9.42172
2013	2013-10-29	302	7	2.54	4.09	3.4	0.727167	0.709546	0.729792	11.4474	9.70688	9.37266
2013	2013-10-29	302	8	2.8	3.27	3.72	0.728249	0.709538	0.729773	11.3167	9.63697	9.30995
2013	2013-10-29	302	9	2.72	3.54	3.92	0.728754	0.709522	0.729754	11.2509	9.58562	9.26957
2013	2013-10-29	302	10	2.81	3.31	4.74	0.72839	0.709504	0.729733	11.2709	9.58109	9.27216
2013	2013-10-29	302	11	3.19	3.46	3.67	0.727669	0.709481	0.729713	11.2994	9.55303	9.24759
2013	2013-10-29	302	12	2.89	3.66	4.6	0.726583	0.709447	0.729693	11.4051	9.54391	9.25268
2013	2013-10-29	302	13	3.06	3.68	3.54	0.723227	0.709408	0.729678	11.7724	9.7143	9.42989
2013	2013-10-29	302	14	3.12	4.01	3.22	0.72055	0.709366	0.729635	12.0586	9.77351	9.4847
2013	2013-10-29	302	15	3.38	3.91	2.99	0.715985	0.711538	0.729574	12.5654	9.93316	9.62228
2013	2013-10-29	302	16	3.2	4.28	3.17	0.712052	0.7234	0.729555	12.9972	10.0376	9.70497
2013	2013-10-29	302	17	3.13	4.32	3.12	0.709333	0.727516	0.732427	13.2897	10.2142	9.994
2013	2013-10-29	302	18	3.06	3.93	3.34	0.708185	0.72721	0.735128	13.3979	10.3445	10.2674
2013	2013-10-29	302	19	2.96	3.94	3.3	0.708235	0.727006	0.734987	13.3677	10.428	10.3907
2013	2013-10-29	302	20	2.93	4.24	2.76	0.708738	0.726815	0.734916	13.2881	10.5046	10.4598
2013	2013-10-29	302	21	2.89	3.63	3.54	0.71022	0.726843	0.734906	13.0963	10.4751	10.4099
2013	2013-10-29	302	22	2.85	3.76	2.85	0.711424	0.72679	0.734892	12.9409	10.4894	10.3806
2013	2013-10-29	302	23	2.82	3.8	2.63	0.712808	0.726817	0.734893	12.765	10.4647	10.3225
2013	2013-10-30	303	0	2.59	3.8	2.3	0.714243	0.726864	0.73491	12.5789	10.4304	10.2436
2013	2013-10-30	303	1	2.62	3.75	2.23	0.715898	0.726876	0.734934	12.3723	10.3712	10.1484
2013	2013-10-30	303	2	2.62	3.38	2.27	0.717651	0.726921	0.733952	12.1589	10.2911	10.0378
2013	2013-10-30	303	3	2.67	3.46	2.3	0.719182	0.72702	0.729235	11.9723	10.2198	9.9361
2013	2013-10-30	303	4	2.58	4.05	2.41	0.720441	0.727148	0.729217	11.8195	10.1564	9.85406
2013	2013-10-30	303	5	2.63	3.52	2.83	0.721374	0.727142	0.729199	11.7021	10.1179	9.80596
2013	2013-10-30	303	6	2.51	3.85	2.6	0.722096	0.727178	0.729175	11.6101	10.0911	9.76693
[truncated: 6,761 more rows]

## Sheet: Data description
Name	Unit	Description
Year	-
Date	-
DOY	-
Hour	-
RS_C1	micromol m-2 s-1	Soil flux Chamber 1
RS_C2	micromol m-2 s-1	Soil flux Chamber 2
RS_C3	micromol m-2 s-1	Soil flux Chamber 3
SWC_1	m3 m-3	Soil water content sensor 1
SWC_2	m3 m-3	Soil water content sensor 2
SWC_3	m3 m-3	Soil water content sensor 3
Tsoil_1	°C	Soil temperature sensor 1
Tsoil_2	°C	Soil temperature sensor 2
Tsoil_3	°C	Soil temperature sensor 3
